# Supplementary material for: Prognostic Value of Copy Number Alteration Burden in Early-Stage Breast Cancer and the Construction of an 11-Gene Copy Number Alteration Model
Source: MDPI journal article supplement (doi:10.3390/cancers14174145), 2022-08-27
Supplement: s1 [file s1]

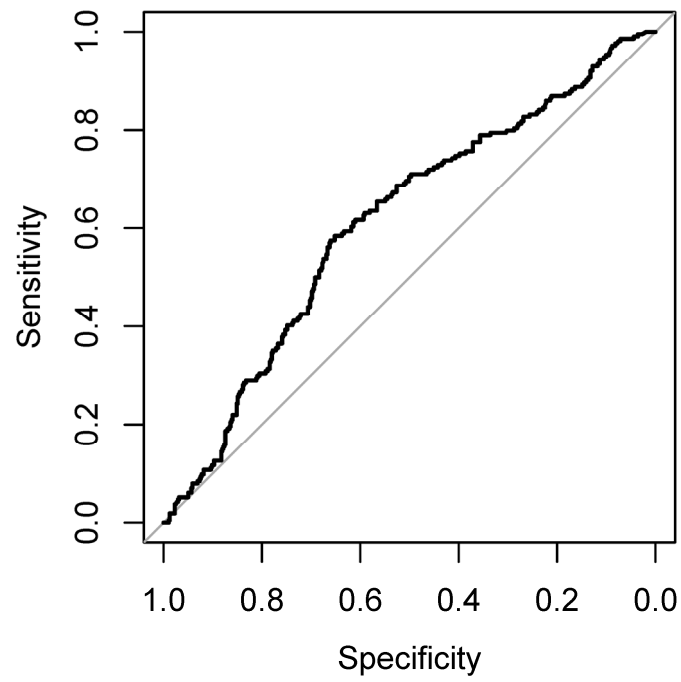

**Supplementary Figure S1** Receiver operating characteristic curve of the 5-year relapse-free survival of patients in the METABRIC cohort

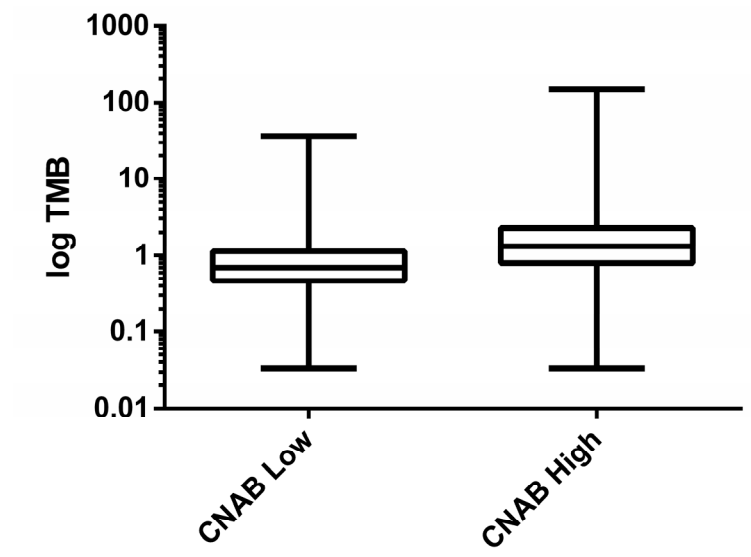

**Supplementary Figure S2** Tumor mutational burden of patients in different copy number alteration burden groups

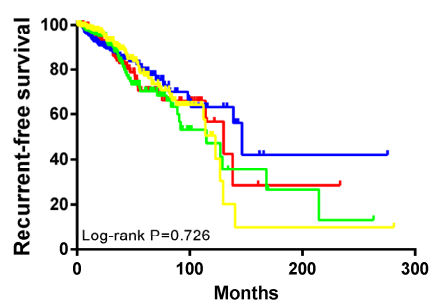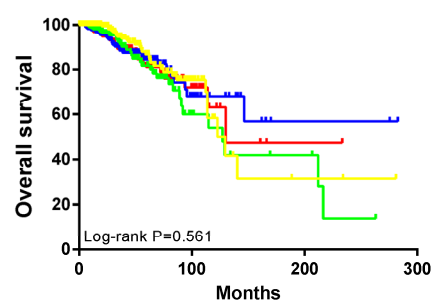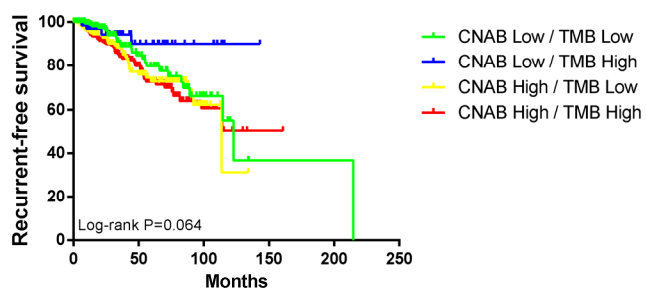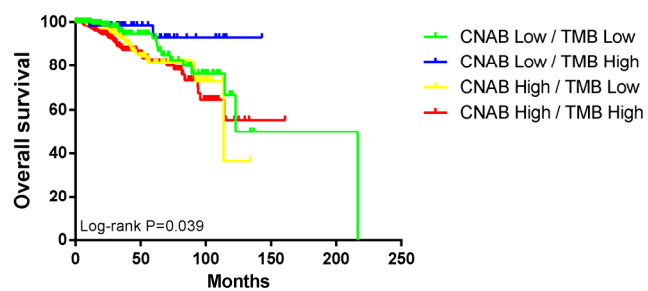

**Supplementary Figure S3** Survival analysis for different tumor mutational burden groups and combined survival analysis of tumor mutational burden and copy number alteration burden of patients in TCGA cohort.

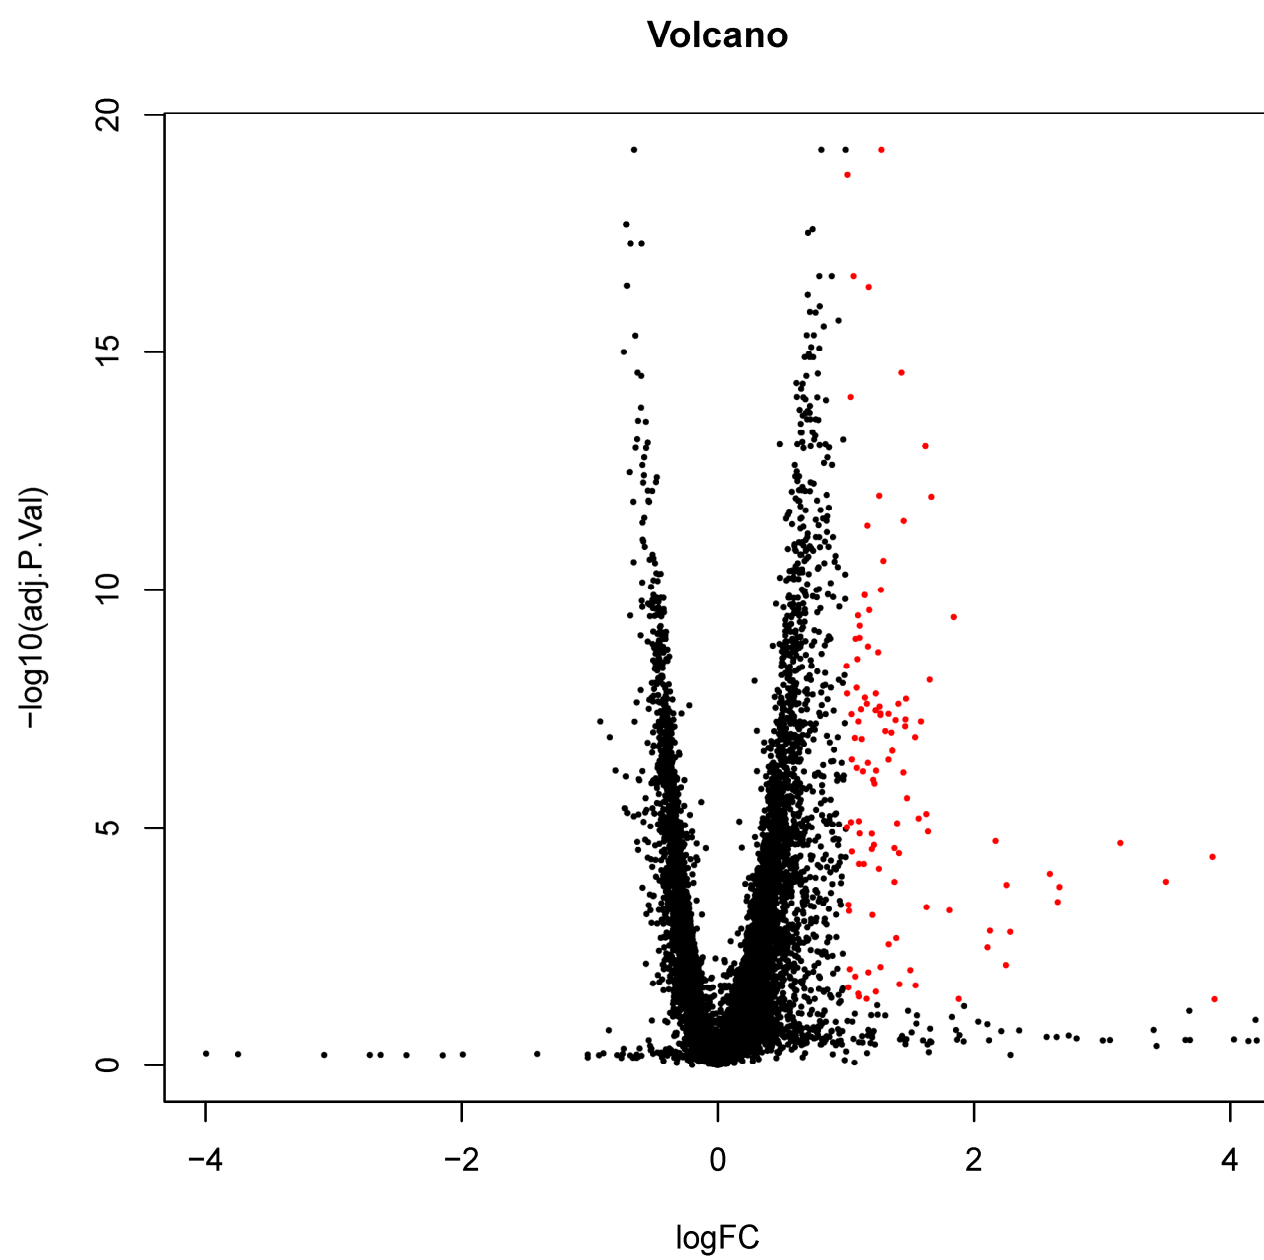

**Supplementary Figure S4** Volcano plot of the expression profile difference between the CNAB11 high group and the CNAB11 low group.
