# Supplementary material for: Prognostic Value of Copy Number Alteration Burden in Early-Stage Breast Cancer and the Construction of an 11-Gene Copy Number Alteration Model
Source: MDPI journal article supplement (doi:10.3390/cancers14174145), 2022-08-27
Supplement: s1 [file s1]

**Supplementary Table S1** Clinical characteristics differences between the high and low CNAB groups of the METABRIC cohort

|                 | Training Cohort |       |           |       |        | Test Cohort |       |           |       |        |
|-----------------|-----------------|-------|-----------|-------|--------|-------------|-------|-----------|-------|--------|
|                 | CNAB Low        |       | CNAB High |       | P      | CNAB Low    |       | CNAB High |       | P      |
|                 | Cases           | %     | Cases     | %     |        | Cases       | %     | Cases     | %     |        |
| Overall         | 416             |       | 298       |       |        | 418         |       | 295       |       |        |
| Age             |                 |       |           |       | 0.276  |             |       |           |       | 0.753  |
| <50             | 173             | 41.59 | 137       | 45.97 |        | 195         | 46.65 | 142       | 48.14 |        |
| ≥50             | 243             | 58.41 | 161       | 54.03 |        | 223         | 53.35 | 153       | 51.86 |        |
| Subtype         |                 |       |           |       | <0.001 |             |       |           |       | <0.001 |
| HR+HER2-        | 339             | 81.49 | 176       | 59.06 |        | 341         | 81.58 | 169       | 57.29 |        |
| HER2+           | 33              | 7.93  | 52        | 17.45 |        | 34          | 8.13  | 58        | 19.66 |        |
| TNBC            | 44              | 10.58 | 70        | 23.49 |        | 43          | 10.29 | 68        | 23.05 |        |
| Grade           |                 |       |           |       | <0.001 |             |       |           |       | <0.001 |
| I               | 51              | 12.26 | 8         | 2.68  |        | 53          | 12.68 | 4         | 1.36  |        |
| II              | 208             | 50    | 74        | 24.83 |        | 195         | 46.65 | 72        | 24.41 |        |
| III             | 139             | 33.41 | 211       | 70.81 |        | 151         | 36.12 | 214       | 72.54 |        |
| Stage           |                 |       |           |       | 0.018  |             |       |           |       | <0.001 |
| I               | 163             | 39.18 | 92        | 30.87 |        | 165         | 39.47 | 76        | 25.76 |        |
| II              | 219             | 52.64 | 174       | 58.39 |        | 233         | 55.74 | 190       | 64.41 |        |
| III             | 34              | 8.17  | 32        | 10.74 |        | 20          | 4.78  | 29        | 9.83  |        |
| Radiotherapy    |                 |       |           |       | 0.088  |             |       |           |       | 0.007  |
| No              | 145             | 34.86 | 85        | 28.52 |        | 167         | 39.95 | 88        | 29.83 |        |
| Yes             | 271             | 65.14 | 213       | 71.48 |        | 251         | 60.05 | 207       | 70.17 |        |
| Chemotherapy    |                 |       |           |       | <0.001 |             |       |           |       | 0.002  |
| No              | 355             | 85.34 | 213       | 71.48 |        | 349         | 83.49 | 202       | 68.47 |        |
| Yes             | 61              | 14.66 | 85        | 28.52 |        | 69          | 16.51 | 93        | 31.53 |        |
| Hormone Therapy |                 |       |           |       | 0.154  |             |       |           |       | 0.186  |
| No              | 150             | 36.06 | 124       | 41.61 |        | 154         | 36.84 | 124       | 42.03 |        |
| Yes             | 266             | 63.94 | 174       | 58.39 |        | 264         | 63.16 | 171       | 57.97 |        |
| Surgery         |                 |       |           |       | 0.389  |             |       |           |       | 0.818  |

|            |     |       |     |       |     |       |     |    |
|------------|-----|-------|-----|-------|-----|-------|-----|----|
| Lumpectomy | 192 | 46.15 | 127 | 42.62 | 172 | 41.15 | 118 | 40 |
| Mastectomy | 224 | 53.85 | 171 | 57.38 | 246 | 58.85 | 177 | 60 |

---

**Supplementary Table S2** Baseline differences between the high and low CNAB groups of TCGA cohort

|              | CNAB Low |       | CNAB High |       | P      |
|--------------|----------|-------|-----------|-------|--------|
|              | Cases    | %     | Cases     | %     |        |
| Overall      | 251      |       | 586       |       |        |
| Age          |          |       |           |       | 0.369  |
| <50          | 127      | 50.6  | 318       | 54.27 |        |
| ≥50          | 124      | 49.4  | 268       | 45.73 |        |
| Subtype      |          |       |           |       | <0.001 |
| HR+HER2-     | 213      | 84.86 | 314       | 53.58 |        |
| HER2+        | 27       | 10.76 | 147       | 25.09 |        |
| TNBC         | 11       | 4.38  | 125       | 21.33 |        |
| Stage        |          |       |           |       | 0.006  |
| I            | 61       | 24.3  | 86        | 14.68 |        |
| II           | 138      | 54.98 | 356       | 60.75 |        |
| III          | 52       | 20.72 | 144       | 24.57 |        |
| Radiotherapy |          |       |           |       | 0.982  |
| No           | 120      | 47.81 | 278       | 47.44 |        |
| Yes          | 131      | 52.19 | 308       | 52.56 |        |
| Drug therapy |          |       |           |       | 0.158  |
| No           | 226      | 90.04 | 546       | 93.17 |        |
| Yes          | 25       | 9.96  | 40        | 6.83  |        |
| Surgery      |          |       |           |       | 0.596  |
| Lumpectomy   | 68       | 27.09 | 126       | 21.5  |        |
| Mastectomy   | 124      | 49.4  | 258       | 44.03 |        |

**Supplementary Table S3** Univariate and multivariate Cox regression model on METABRIC test cohort

|                 | Recurrent-free survival   |          |                             |          | Overall survival          |          |                             |          |
|-----------------|---------------------------|----------|-----------------------------|----------|---------------------------|----------|-----------------------------|----------|
|                 | Univariate Cox regression |          | Multivariate Cox regression |          | Univariate Cox regression |          | Multivariate Cox regression |          |
|                 | HR                        | <i>P</i> | HR                          | <i>P</i> | HR                        | <i>P</i> | HR                          | <i>P</i> |
| CNAB            |                           |          |                             |          |                           |          |                             |          |
| Low             | 1 (reference)             |          | 1 (reference)               |          | 1 (reference)             |          | 1 (reference)               |          |
| High            | 1.44 (1.19-1.74)          | <0.001   | 1.33 (1.08-1.63)            | 0.008    | 1.46 (1.2-1.79)           | <0.001   | 1.25 (1.01-1.56)            | 0.042    |
| Age             |                           |          |                             |          |                           |          |                             |          |
| <60             | 1 (reference)             |          | 1 (reference)               |          | 1 (reference)             |          | 1 (reference)               |          |
| ≥60             | 1.69 (1.39-2.06)          | <0.001   | 1.62 (1.32-1.99)            | <0.001   | 2.15 (1.74-2.66)          | <0.001   | 2.09 (1.68-2.6)             | <0.001   |
| Subtype         |                           |          |                             |          |                           |          |                             |          |
| HER2+           | 1 (reference)             |          | 1 (reference)               |          | 1 (reference)             |          | 1 (reference)               |          |
| HR+HER2-        | 0.63 (0.48-0.83)          | <0.001   | 0.64 (0.48-0.86)            | 0.003    | 0.56 (0.42-0.73)          | <0.001   | 0.56 (0.42-0.75)            | <0.001   |
| TNBC            | 0.57 (0.4-0.82)           | 0.002    | 0.57 (0.39-0.81)            | 0.002    | 0.62 (0.43-0.88)          | 0.009    | 0.6 (0.42-0.87)             | 0.007    |
| Grade           |                           |          |                             |          |                           |          |                             |          |
| I               | 1 (reference)             |          | 1 (reference)               |          | 1 (reference)             |          | 1 (reference)               |          |
| II              | 1.4 (0.92-2.12)           | 0.115    | 1.05 (0.69-1.6)             | 0.819    | 1.46 (0.93-2.3)           | 0.096    | 1.01 (0.64-1.6)             | 0.958    |
| III             | 1.63 (1.08-2.44)          | 0.019    | 1.02 (0.66-1.57)            | 0.941    | 1.82 (1.17-2.83)          | 0.008    | 0.99 (0.62-1.59)            | 0.973    |
| Stage           |                           |          |                             |          |                           |          |                             |          |
| I               | 1 (reference)             |          | 1 (reference)               |          | 1 (reference)             |          | 1 (reference)               |          |
| II              | 1.59 (1.28-1.97)          | <0.001   | 1.45 (1.16-1.82)            | 0.001    | 1.81 (1.44-2.28)          | <0.001   | 1.62 (1.27-2.06)            | <0.001   |
| III             | 3.04 (2.1-4.38)           | <0.001   | 2.82 (1.94-4.1)             | <0.001   | 3.62 (2.48-5.28)          | <0.001   | 3.2 (2.17-4.71)             | <0.001   |
| Radiotherapy    |                           |          |                             |          |                           |          |                             |          |
| No              | 1 (reference)             |          |                             |          | 1 (reference)             |          |                             |          |
| Yes             | 0.89 (0.73-1.08)          | 0.239    |                             |          | 0.93 (0.76-1.13)          | 0.455    |                             |          |
| Chemotherapy    |                           |          |                             |          |                           |          |                             |          |
| No              | 1 (reference)             |          |                             |          | 1 (reference)             |          |                             |          |
| Yes             | 1.11 (0.88-1.41)          | 0.382    |                             |          | 1.17 (0.91-1.5)           | 0.211    |                             |          |
| Hormone Therapy |                           |          |                             |          |                           |          |                             |          |
| No              | 1 (reference)             |          |                             |          | 1 (reference)             |          |                             |          |

|            |                  |        |                  |        |                  |        |                  |        |
|------------|------------------|--------|------------------|--------|------------------|--------|------------------|--------|
| Yes        | 1.06 (0.87-1.28) | 0.575  |                  |        | 1.21 (0.98-1.48) | 0.072  |                  |        |
| Surgery    |                  |        |                  |        |                  |        |                  |        |
| Lumpectomy | 1 (reference)    |        | 1 (reference)    |        | 1 (reference)    |        | 1 (reference)    |        |
| Mastectomy | 1.57 (1.29-1.92) | <0.001 | 1.45 (1.18-1.79) | <0.001 | 1.63 (1.32-2.01) | <0.001 | 1.45 (1.17-1.81) | <0.001 |

---

**Supplementary Table S4** Univariate and multivariate Cox regression model on TCGA cohort

|              | Recurrent-free survival   |          |                             |          | Overall survival          |          |                             |          |
|--------------|---------------------------|----------|-----------------------------|----------|---------------------------|----------|-----------------------------|----------|
|              | Univariate Cox regression |          | Multivariate Cox regression |          | Univariate Cox regression |          | Multivariate Cox regression |          |
|              | HR                        | <i>P</i> | HR                          | <i>P</i> | HR                        | <i>P</i> | HR                          | <i>P</i> |
| CNAB         |                           |          |                             |          |                           |          |                             |          |
| Low          | 1 (reference)             |          | 1 (reference)               |          | 1 (reference)             |          | 1 (reference)               |          |
| High         | 1.62 (1.08-2.46)          | 0.021    | 1.68 (1.11-2.54)            | 0.015    | 1.94 (1.15-3.28)          | 0.013    | 2.28 (1.19-4.4)             | 0.014    |
| Age          |                           |          |                             |          |                           |          |                             |          |
| <60          | 1 (reference)             |          | 1 (reference)               |          | 1 (reference)             |          | 1 (reference)               |          |
| ≥60          | 1.95 (1.36-2.78)          | <0.001   | 2.07 (1.44-2.97)            | <0.001   | 2.41 (1.55-3.75)          | <0.001   | 2.39 (1.35-4.25)            | 0.003    |
| Subtype      |                           |          |                             |          |                           |          |                             |          |
| HER2+        | 1 (reference)             |          |                             |          | 1 (reference)             |          |                             |          |
| HR+HER2-     | 0.75 (0.47-1.17)          | 0.205    |                             |          | 0.6 (0.35-1.03)           | 0.065    |                             |          |
| TNBC         | 1.25 (0.74-2.11)          | 0.408    |                             |          | 1.17 (0.63-2.18)          | 0.61     |                             |          |
| Stage        |                           |          |                             |          |                           |          |                             |          |
| I            | 1 (reference)             |          | 1 (reference)               |          | 1 (reference)             |          | 1 (reference)               |          |
| II           | 1.42 (0.83-2.42)          | 0.206    | 1.39 (0.81-2.39)            | 0.233    | 1.39 (0.71-2.72)          | 0.331    | 1.84 (0.63-5.42)            | 0.268    |
| III          | 3.42 (1.95-6.01)          | <0.001   | 4.84 (2.71-8.62)            | <0.001   | 3.61 (1.81-7.17)          | <0.001   | 10.65 (3.41-33.21)          | <0.001   |
| Radiotherapy |                           |          |                             |          |                           |          |                             |          |
| No           | 1 (reference)             |          | 1 (reference)               |          | 1 (reference)             |          | 1 (reference)               |          |
| Yes          | 0.52 (0.37-0.75)          | <0.001   | 0.41 (0.28-0.59)            | <0.001   | 0.31 (0.2-0.49)           | <0.001   | 0.25 (0.13-0.48)            | <0.001   |
| Drug therapy |                           |          |                             |          |                           |          |                             |          |
| No           | 1 (reference)             |          |                             |          | 1 (reference)             |          |                             |          |
| Yes          | 1.14 (0.6-2.18)           | 0.696    |                             |          | 1.05 (0.46-2.41)          | 0.914    |                             |          |
| Surgery      |                           |          |                             |          |                           |          |                             |          |
| Lumpectomy   | 1 (reference)             |          |                             |          | 1 (reference)             |          | 1 (reference)               |          |
| Mastectomy   | 1.31 (0.82-2.1)           | 0.261    |                             |          | 1.92 (1-3.67)             | 0.048    | 1.01 (0.5-2.07)             | 0.973    |

**Supplementary Table S5** Sensitivity Analysis

|                      | Recurrent-free survival |          | Overall survival |          |
|----------------------|-------------------------|----------|------------------|----------|
|                      | HR                      | <i>P</i> | HR               | <i>P</i> |
| METABRIC test cohort |                         |          |                  |          |
| Cut-off=1            | 1.26 (1.00-1.59)        | 0.052    | 1.40 (1.09-1.80) | 0.009    |
| Cut-off=1.4          | 1.26 (1.03-1.54)        | 0.028    | 1.27 (1.03-1.57) | 0.028    |
| Cut-off=1.8          | 1.34 (1.11-1.62)        | 0.002    | 1.40 (1.15-1.71) | <0.001   |
| Cut-off=2.2          | 1.44 (1.19-1.74)        | <0.001   | 1.46 (1.20-1.79) | <0.001   |
| Cut-off=2.6          | 1.40 (1.15-1.70)        | <0.001   | 1.43 (1.16-1.76) | <0.001   |
| Cut-off=3            | 1.21 (0.97-1.5)         | 0.090    | 1.25 (1.00-1.57) | 0.053    |
| TCGA                 |                         |          |                  |          |
| Cut-off=1            | 1.34 (0.70-2.55)        | 0.379    | 1.51 (0.66-3.46) | 0.334    |
| Cut-off=1.4          | 1.38 (0.84-2.28)        | 0.203    | 2.32 (1.12-4.80) | 0.024    |
| Cut-off=1.8          | 1.46 (0.94-2.26)        | 0.094    | 1.75 (1.00-3.08) | 0.051    |
| Cut-off=2.2          | 1.62 (1.08-2.46)        | 0.021    | 1.94 (1.15-3.28) | 0.013    |
| Cut-off=2.6          | 1.50 (1.02-2.20)        | 0.041    | 2.06 (1.25-3.42) | 0.005    |
| Cut-off=3            | 1.44 (0.99-2.09)        | 0.054    | 2.17 (1.33-3.54) | 0.002    |

**Supplementary Table S6** Subgroup survival analysis on RFS

|                 | Cases | Events | Univariate Cox regression |          | Multivariate Cox regression |          |
|-----------------|-------|--------|---------------------------|----------|-----------------------------|----------|
|                 |       |        | HR                        | <i>P</i> | HR                          | <i>P</i> |
| <b>METABRIC</b> |       |        |                           |          |                             |          |
| Overall         | 713   | 431    | 1.44 (1.19-1.74)          | <0.001   | 1.33 (1.08-1.63)            | 0.008    |
| Age             |       |        |                           |          |                             |          |
| <60             | 337   | 157    | 2.04 (1.49-2.79)          | <0.001   | 1.83 (1.3-2.59)             | <0.001   |
| ≥60             | 376   | 274    | 1.12 (0.88-1.43)          | 0.355    | 1.11 (0.85-1.46)            | 0.439    |
| Subtype         |       |        |                           |          |                             |          |
| HR+HER2-        | 510   | 309    | 1.44 (1.14-1.82)          | 0.002    | 1.29 (1-1.66)               | 0.047    |
| HER2+           | 92    | 66     | 1.55 (0.92-2.59)          | 0.097    | 1.44 (0.82-2.52)            | 0.2      |
| TNBC            | 111   | 56     | 1.22 (0.71-2.12)          | 0.473    | 1.08 (0.6-1.96)             | 0.796    |
| Stage           |       |        |                           |          |                             |          |
| I               | 241   | 119    | 1.15 (0.78-1.69)          | 0.485    | 1.11 (0.72-1.71)            | 0.634    |
| II              | 423   | 274    | 1.39 (1.1-1.76)           | 0.007    | 1.37 (1.05-1.78)            | 0.019    |
| III             | 49    | 38     | 1.55 (0.79-3.04)          | 0.199    | 1.89 (0.89-4.04)            | 0.098    |
| <b>TCGA</b>     |       |        |                           |          |                             |          |
| Overall         | 837   | 124    | 1.62 (1.08-2.46)          | 0.021    | 1.68 (1.11-2.54)            | 0.015    |
| Age             |       |        |                           |          |                             |          |
| <60             | 445   | 55     | 1.48 (0.79-2.77)          | 0.215    | 1.57 (0.84-2.95)            | 0.156    |
| ≥60             | 392   | 69     | 1.93 (1.1-3.37)           | 0.021    | 1.74 (0.99-3.06)            | 0.52     |
| Stage           |       |        |                           |          |                             |          |
| I               | 147   | 17     | 1.51 (0.52-4.35)          | 0.448    | 1.6 (0.55-4.61)             | 0.386    |
| II              | 494   | 62     | 1.37 (0.76-2.45)          | 0.293    | 1.44 (0.8-2.59)             | 0.218    |
| III             | 196   | 45     | 2.12 (1.02-4.442)         | 0.044    | 1.86 (0.89-3.9)             | 0.098    |



**Supplementary Table S7** Subgroup survival analysis on OS

|                 | Cases | Events | Univariate Cox regression |          | Multivariate Cox regression |          |
|-----------------|-------|--------|---------------------------|----------|-----------------------------|----------|
|                 |       |        | HR                        | <i>P</i> | HR                          | <i>P</i> |
| <b>METABRIC</b> |       |        |                           |          |                             |          |
| Overall         | 713   | 392    | 1.46 (1.2-1.79)           | <0.001   | 1.25 (1.01-1.56)            | 0.042    |
| Age             |       |        |                           |          |                             |          |
| <60             | 337   | 128    | 2.22 (1.57-3.15)          | <0.001   | 1.77 (1.21-2.58)            | 0.003    |
| ≥60             | 376   | 264    | 1.14 (0.89-1.46)          | 0.286    | 1.08 (0.82-1.43)            | 0.577    |
| Subtype         |       |        |                           |          |                             |          |
| HR+HER2-        | 510   | 274    | 1.4 (1.1-1.79)            | 0.007    | 1.21 (0.93-1.58)            | 0.164    |
| HER2+           | 92    | 63     | 1.45 (0.85-2.45)          | 0.169    | 1.39 (0.78-2.47)            | 0.265    |
| TNBC            | 111   | 55     | 1.33 (0.76-2.33)          | 0.316    | 1.16 (0.63-2.11)            | 0.638    |
| Stage           |       |        |                           |          |                             |          |
| I               | 241   | 104    | 1.31 (0.87-1.97)          | 0.196    | 1.26 (0.79-1.98)            | 0.329    |
| II              | 423   | 251    | 1.33 (1.04-1.7)           | 0.024    | 1.23 (0.94-1.61)            | 0.13     |
| III             | 49    | 37     | 1.48 (0.75-2.91)          | 0.255    | 1.46 (0.7-3.07)             | 0.314    |
| <b>TCGA</b>     |       |        |                           |          |                             |          |
| Overall         | 837   | 84     | 1.94 (1.15-3.28)          | 0.013    | 2.28 (1.19-4.4)             | 0.014    |
| Age             |       |        |                           |          |                             |          |
| <60             | 445   | 34     | 1.78 (0.77-4.11)          | 0.175    | 1.88 (0.81-4.36)            | 0.144    |
| ≥60             | 392   | 50     | 2.4 (1.2-4.79)            | 0.013    | 2.26 (1.11-4.62)            | 0.025    |
| Stage           |       |        |                           |          |                             |          |
| I               | 147   | 11     | 1.03 (0.29-3.66)          | 0.965    | 1.06 (0.3-3.78)             | 0.92     |
| II              | 494   | 41     | 2.08 (0.92-4.7)           | 0.078    | 2.24 (0.98-5.09)            | 0.055    |
| III             | 196   | 32     | 2.38 (0.97-5.8)           | 0.058    | 2.07 (0.84-5.09)            | 0.114    |
