# Supplementary material for: Prognostic Value of Copy Number Alteration Burden in Early-Stage Breast Cancer and the Construction of an 11-Gene Copy Number Alteration Model
Source: Cancers (Basel). 2022 Aug 27;14(17):4145. doi: 10.3390/cancers14174145 (PMC9454926; doi:10.3390/cancers14174145)
Supplement: Supplementary file 1 [file cancers-14-04145-s001.zip]

Archive with 4 entries (4 files):
- Supplementary Figures.pdf
- Supplementary Method.pdf
- Supplementary Tables S1-S7.pdf
- Supplementary Tables S8-S10.xlsx
