# Supplementary material for: Prognostic Value of Copy Number Alteration Burden in Early-Stage Breast Cancer and the Construction of an 11-Gene Copy Number Alteration Model
Source: Cancers (Basel). 2022 Aug 27;14(17):4145. doi: 10.3390/cancers14174145 (PMC9454926; doi:10.3390/cancers14174145)
Supplement: Supplementary file 1 [file cancers-14-04145-s001.zip › Supplementary Tables S8-S10.xlsx]

## Sheet: Supplementary Table S8
Supplementary Table S8 Chi-Square test of METABRIC training cohort between relapse group and non-relapse group
Gene	normalRatio	tumorRatio	Stat	Pvalue	adjPvalue
A1BG	0.819959	0.776156	3.28205	0.0700415	1
A1BG-AS1	0.819959	0.776156	3.28205	0.0700415	1
A1CF	0.84465	0.778589	8.28061	0.00400706	1
A2M	0.814815	0.720195	14.8529	0.000116232	1
A2M-AS1	0.815844	0.720195	15.2213	9.56167e-05	1
A2ML1	0.8107	0.722628	12.7385	0.00035821	1
A2MP1	0.816872	0.725061	14.1084	0.000172572	1
A3GALT2	0.809671	0.710462	16.0046	6.31893e-05	1
A4GALT	0.646091	0.593674	3.18539	0.0742993	1
A4GNT	0.845679	0.817518	1.48125	0.22358	1
AAAS	0.869342	0.815085	6.36344	0.0116496	1
AACS	0.823045	0.793187	1.51044	0.219071	1
AACSP1	0.798354	0.725061	8.52578	0.00350151	1
AADAC	0.84465	0.781022	7.69115	0.00554922	1
AADACL2	0.843621	0.788321	5.7988	0.0160371	1
AADACL3	0.751029	0.671533	8.80967	0.00299639	1
AADACL4	0.752058	0.6691	9.61149	0.00193364	1
AADAT	0.811728	0.773723	2.37949	0.122938	1
AAED1	0.795267	0.722628	8.29473	0.00397602	1
AAGAB	0.82716	0.759124	8.1518	0.00430185	1
AAK1	0.903292	0.858881	5.37882	0.0203827	1
AAMDC	0.692387	0.642336	3.08682	0.0789288	1
AAMP	0.868313	0.841849	1.47153	0.225105	1
AANAT	0.697531	0.652068	2.55595	0.10988	1
AAR2	0.77572	0.73236	2.76693	0.0962305	1
AARD	0.532922	0.430657	11.6784	0.000632308	1
AARS	0.371399	0.440389	5.48325	0.0191995	1
AARS2	0.835391	0.822384	0.262152	0.608645	1
AARSD1	0.700617	0.540146	32.12	1.44935e-08	0.000321379
AASDH	0.86214	0.80292	7.27147	0.00700583	1
AASDHPPT	0.601852	0.564477	1.51798	0.217926	1
AASS	0.789095	0.751825	2.11245	0.146105	1
AATF	0.69856	0.56691	21.7099	3.17147e-06	0.0703243
AATK	0.703704	0.603406	12.7701	0.000352195	1
AATK-AS1	0.703704	0.600973	13.3931	0.000252553	1
ABAT	0.563786	0.647202	7.95936	0.00478393	1
ABCA1	0.790123	0.737226	4.32866	0.0374758	1
ABCA10	0.708848	0.620438	10.0166	0.00155137	1
ABCA11P	0.8107	0.720195	13.4339	0.000247121	1
ABCA12	0.87037	0.836983	2.41074	0.120505	1
ABCA13	0.8107	0.781022	1.42007	0.233391	1
ABCA17P	0.569959	0.63017	4.07744	0.0434595	1
ABCA2	0.794239	0.737226	5.09953	0.0239323	1
ABCA3	0.566872	0.622871	3.50039	0.0613543	1
ABCA4	0.762346	0.73236	1.24133	0.265215	1
ABCA5	0.710905	0.620438	10.5235	0.00117864	1
ABCA6	0.708848	0.627737	8.43162	0.00368751	1
ABCA7	0.762346	0.6618	14.3932	0.000148335	1
ABCA8	0.704733	0.622871	8.52932	0.00349471	1
ABCA9	0.707819	0.625304	8.71111	0.00316277	1
ABCA9-AS1	0.70679	0.627737	7.9805	0.0047284	1
ABCB1	0.817901	0.756691	6.38009	0.0115407	1
ABCB10	0.411523	0.355231	3.5989	0.0578179	1
ABCB11	0.886831	0.841849	4.88901	0.0270281	1
ABCB4	0.819959	0.76399	5.37835	0.0203882	1
ABCB5	0.79321	0.756691	2.05302	0.151904	1
ABCB6	0.868313	0.839416	1.76762	0.183676	1
ABCB7	0.760288	0.708029	3.87955	0.0488777	1
ABCB8	0.771605	0.756691	0.281052	0.596012	1
ABCB9	0.783951	0.734793	3.66134	0.0556889	1
ABCC1	0.585391	0.673966	9.17203	0.00245741	1
ABCC10	0.82716	0.807786	0.61296	0.433675	1
ABCC11	0.423868	0.498783	6.2611	0.0123417	1
ABCC12	0.423868	0.498783	6.2611	0.0123417	1
ABCC13	0.816872	0.77129	3.51581	0.0607861	1
ABCC2	0.803498	0.76399	2.50019	0.113833	1
ABCC3	0.703704	0.588808	16.7196	4.33299e-05	0.960798
ABCC4	0.649177	0.603406	2.4188	0.119887	1
ABCC5	0.822016	0.778589	3.25162	0.0713529	1
ABCC5-AS1	0.822016	0.778589	3.25162	0.0713529	1
ABCC6	0.583333	0.673966	9.59884	0.001947	1
ABCC6P1	0.591564	0.673966	7.94755	0.00481525	1
ABCC6P2	0.583333	0.676399	10.1383	0.00145223	1
ABCC8	0.797325	0.734793	6.19747	0.0127933	1
ABCC9	0.816872	0.717762	16.3642	5.2264e-05	1
ABCD1	0.74177	0.712895	1.0879	0.296937	1
ABCD2	0.87963	0.827251	6.30856	0.0120156	1
ABCD3	0.76749	0.737226	1.28377	0.257199	1
ABCD4	0.744856	0.686131	4.73199	0.0296067	1
ABCE1	0.839506	0.800487	2.81903	0.0931525	1
ABCF1	0.855967	0.822384	2.24921	0.133683	1
ABCF2	0.771605	0.761557	0.112347	0.737488	1
ABCF3	0.822016	0.778589	3.25162	0.0713529	1
ABCG1	0.835391	0.798054	2.52858	0.111801	1
ABCG2	0.850823	0.781022	9.48931	0.00206673	1
ABCG4	0.595679	0.530414	4.77521	0.0288723	1
ABCG5	0.860082	0.812652	4.63003	0.031417	1
ABCG8	0.859053	0.812652	4.407	0.0357917	1
ABHD1	0.866255	0.846715	0.762954	0.382406	1
ABHD10	0.868313	0.844282	1.20146	0.27303	1
ABHD11	0.798354	0.744526	4.60436	0.0318908	1
ABHD12	0.777778	0.727494	3.76387	0.0523713	1
ABHD12B	0.786008	0.737226	3.62758	0.0568295	1
ABHD13	0.675926	0.591241	8.74614	0.00310258	1
ABHD14A	0.760288	0.683698	8.36199	0.00383152	1
ABHD14A-ACY1	0.760288	0.683698	8.36199	0.00383152	1
ABHD14B	0.760288	0.683698	8.36199	0.00383152	1
ABHD15	0.692387	0.593674	12.1606	0.000488085	1
ABHD16A	0.858025	0.836983	0.85316	0.35566	1
ABHD16B	0.680041	0.600973	7.6617	0.00564054	1
ABHD17A	0.769547	0.6691	14.6195	0.000131546	1
ABHD17B	0.80144	0.722628	9.9376	0.00161936	1
ABHD17C	0.813786	0.759124	5.01206	0.0251713	1
ABHD2	0.800412	0.725061	9.06501	0.00260547	1
ABHD3	0.782922	0.6618	21.7821	3.0543e-06	0.0677261
ABHD4	0.786008	0.756691	1.26986	0.259792	1
ABHD5	0.788066	0.727494	5.64824	0.0174729	1
ABHD6	0.761317	0.666667	12.749	0.000356192	1
ABHD8	0.841564	0.778589	7.43275	0.00640474	1
ABI1	0.835391	0.79562	2.87665	0.0898726	1
ABI2	0.81893	0.766423	4.71368	0.0299236	1
ABI3	0.70679	0.576642	21.4827	3.57029e-06	0.0791676
ABI3BP	0.876543	0.839416	3.10911	0.0778553	1
ABL1	0.808642	0.746959	6.26506	0.0123142	1
ABL2	0.440329	0.428224	0.126382	0.722214	1
ABLIM1	0.811728	0.773723	2.37949	0.122938	1
ABLIM2	0.798354	0.725061	8.52578	0.00350151	1
ABLIM3	0.790123	0.70073	12.2955	0.000454045	1
ABO	0.803498	0.739659	6.59135	0.0102476	1
ABR	0.536008	0.437956	10.7219	0.00105877	1
ABRA	0.553498	0.459854	9.78691	0.00175758	1
ABRACL	0.710905	0.671533	1.94601	0.163017	1
ABT1	0.854938	0.805353	4.92695	0.026441	1
ABTB1	0.849794	0.815085	2.33129	0.126796	1
ABTB2	0.820988	0.746959	9.40105	0.00216861	1
ACAA1	0.789095	0.744526	3.04811	0.0808313	1
ACAA2	0.759259	0.666667	12.1489	0.000491168	1
ACACA	0.693416	0.564477	20.6877	5.40635e-06	0.11988
ACACB	0.831276	0.800487	1.6679	0.19654	1
ACAD10	0.81893	0.783455	2.12343	0.145061	1
ACAD11	0.847737	0.815085	2.03466	0.153748	1
ACAD8	0.603909	0.549878	3.26115	0.0709393	1
ACAD9	0.855967	0.815085	3.35962	0.0668133	1
ACADL	0.873457	0.827251	4.73787	0.0295056	1
ACADM	0.803498	0.73236	8.17225	0.00425361	1
ACADS	0.794239	0.739659	4.67135	0.0306697	1
ACADSB	0.814815	0.776156	2.49323	0.114337	1
ACADVL	0.523663	0.394161	18.8796	1.39235e-05	0.308739
ACAN	0.791152	0.742092	3.72923	0.0534679	1
ACAP1	0.523663	0.391727	19.6072	9.51107e-06	0.210898
ACAP2	0.797325	0.756691	2.59247	0.107373	1
ACAP3	0.768519	0.708029	5.32664	0.0210018	1
ACAT1	0.58642	0.540146	2.34193	0.125934	1
ACAT2	0.720165	0.681265	1.93263	0.164471	1
ACBD3	0.404321	0.36983	1.29834	0.254517	1
ACBD4	0.705761	0.542579	33.425	7.40667e-09	0.000164235
ACBD5	0.835391	0.793187	3.24598	0.0715991	1
ACBD6	0.424897	0.420925	0.00594414	0.938545	1
ACBD7	0.838477	0.793187	3.79653	0.051359	1
ACCS	0.837449	0.790754	4.01915	0.0449864	1
ACCSL	0.837449	0.790754	4.01915	0.0449864	1
ACD	0.381687	0.447689	4.96625	0.0258466	1
ACE	0.691358	0.571776	17.7739	2.48777e-05	0.551637
ACE2	0.778807	0.703163	8.5626	0.00343138	1
ACER1	0.811728	0.73236	10.4274	0.00124157	1
ACER2	0.736626	0.586375	29.8936	4.56423e-08	0.00101207
ACER3	0.713992	0.666667	2.85907	0.0908599	1
ACHE	0.791152	0.742092	3.72923	0.0534679	1
ACIN1	0.799383	0.751825	3.59738	0.0578708	1
ACKR2	0.788066	0.73236	4.77376	0.0288966	1
ACKR3	0.843621	0.807786	2.41485	0.120189	1
ACLY	0.6893	0.542579	26.5437	2.57646e-07	0.00571304
ACMSD	0.873457	0.810219	8.79759	0.00301628	1
ACO1	0.769547	0.635036	25.8126	3.76221e-07	0.00834232
ACO2	0.640947	0.593674	2.5614	0.109501	1
ACOT11	0.800412	0.703163	14.9501	0.00011039	1
ACOT12	0.778807	0.664234	19.3491	1.08872e-05	0.241412
ACOT13	0.840535	0.800487	2.98669	0.0839518	1
ACOT2	0.72428	0.659367	5.54428	0.0185412	1
ACOT4	0.72428	0.659367	5.54428	0.0185412	1
ACOT6	0.72428	0.656934	5.97102	0.0145428	1
ACOT7	0.770576	0.693431	8.70752	0.00316901	1
ACOT8	0.764403	0.690998	7.76323	0.00533205	1
ACOT9	0.742798	0.688564	4.00903	0.0452571	1
ACOX1	0.703704	0.647202	4.02918	0.0447196	1
ACOX2	0.76749	0.688564	9.0382	0.00264396	1
ACOX3	0.796296	0.722628	8.55654	0.00344283	1
ACOXL	0.896091	0.875912	1.00482	0.316147	1
ACP1	0.848765	0.793187	5.99918	0.0143125	1
ACP2	0.820988	0.776156	3.45438	0.0630844	1
ACP5	0.81893	0.744526	9.42313	0.00214266	1
ACP6	0.452675	0.462287	0.0723412	0.787958	1
ACPP	0.849794	0.819951	1.70651	0.191438	1
ACPT	0.839506	0.805353	2.14559	0.14298	1
ACR	0.653292	0.622871	1.03742	0.308423	1
ACRBP	0.803498	0.720195	11.1552	0.000837945	1
ACRC	0.75823	0.710462	3.21462	0.0729831	1
ACRV1	0.613169	0.549878	4.5403	0.0331057	1
ACSBG1	0.807613	0.749392	5.56241	0.0183502	1
ACSBG2	0.8107	0.725061	12.06	0.000515142	1
ACSF2	0.703704	0.588808	16.7196	4.33299e-05	0.960798
ACSF3	0.378601	0.450122	5.86289	0.0154634	1
ACSL1	0.784979	0.722628	5.93013	0.0148841	1
ACSL3	0.867284	0.824818	3.85889	0.049483	1
ACSL4	0.754115	0.690998	5.59341	0.0180281	1
ACSL5	0.815844	0.776156	2.64143	0.10411	1
ACSL6	0.76749	0.690998	8.49319	0.00356478	1
ACSM1	0.583333	0.659367	6.67888	0.00975618	1
ACSM2A	0.585391	0.664234	7.21209	0.0072414	1
ACSM2B	0.587449	0.666667	7.29711	0.00690657	1
ACSM3	0.584362	0.656934	6.07102	0.0137417	1
ACSM4	0.804527	0.717762	12.1222	0.000498255	1
ACSM5	0.58642	0.6618	6.57906	0.0103185	1
ACSS1	0.730453	0.698297	1.32894	0.248994	1
ACSS2	0.790123	0.73236	5.16775	0.02301	1
ACSS3	0.853909	0.793187	7.32691	0.00679299	1
ACTA1	0.410494	0.355231	3.46667	0.0626173	1
ACTA2	0.812757	0.749392	6.70704	0.00960328	1
ACTA2-AS1	0.812757	0.749392	6.70704	0.00960328	1
ACTB	0.781893	0.744526	2.07637	0.149596	1
ACTBL2	0.788066	0.708029	9.8316	0.00171539	1
ACTC1	0.779835	0.710462	7.22989	0.00716997	1
ACTG1	0.701646	0.605839	11.6198	0.000652547	1
ACTG1P4	0.769547	0.73236	1.98242	0.159136	1
ACTG2	0.908436	0.861314	6.30311	0.0120526	1
ACTL10	0.797325	0.76399	1.7236	0.189231	1
ACTL6A	0.817901	0.766423	4.51208	0.0336562	1
ACTL6B	0.790123	0.744526	3.20363	0.0734749	1
ACTL7A	0.799383	0.751825	3.59738	0.0578708	1
ACTL7B	0.799383	0.754258	3.23345	0.0721487	1
ACTL8	0.756173	0.666667	11.2801	0.00078344	1
ACTL9	0.820988	0.744526	10.0175	0.00155058	1
ACTN1	0.756173	0.693431	5.55448	0.0184335	1
ACTN1-AS1	0.759259	0.693431	6.16363	0.0130403	1
ACTN2	0.406379	0.374696	1.08252	0.298134	1
ACTN3	0.790123	0.768856	0.650585	0.419904	1
ACTN4	0.84465	0.810219	2.23559	0.134865	1
ACTR10	0.786008	0.751825	1.7493	0.185965	1
ACTR1A	0.813786	0.761557	4.57408	0.0324593	1
ACTR1B	0.919753	0.883212	4.22711	0.039783	1
ACTR2	0.889918	0.827251	9.56474	0.0019835	1
ACTR3	0.901235	0.875912	1.69237	0.193289	1
ACTR3B	0.751029	0.744526	0.0350025	0.851591	1
ACTR3BP2	0.918724	0.890511	2.48197	0.115158	1
ACTR3BP5	0.868313	0.829684	3.20594	0.0733715	1
ACTR3C	0.776749	0.756691	0.549159	0.458662	1
ACTR5	0.770576	0.717762	4.07374	0.0435547	1
ACTR6	0.842593	0.80292	2.95824	0.0854409	1
ACTR8	0.765432	0.698297	6.51241	0.0107124	1
ACTRT1	0.740741	0.693431	3.02137	0.0821738	1
ACTRT2	0.766461	0.710462	4.5348	0.0332124	1
ACTRT3	0.820988	0.776156	3.45438	0.0630844	1
ACVR1	0.891975	0.841849	6.27517	0.0122442	1
ACVR1B	0.853909	0.800487	5.68648	0.0170961	1
ACVR1C	0.893004	0.839416	7.20505	0.00726986	1
ACVR2A	0.889918	0.827251	9.56474	0.0019835	1
ACVR2B	0.791152	0.754258	2.08265	0.148981	1
ACVR2B-AS1	0.791152	0.754258	2.08265	0.148981	1
ACVRL1	0.851852	0.80292	4.72438	0.0297378	1
ACY1	0.760288	0.683698	8.36199	0.00383152	1
ACY3	0.773663	0.756691	0.377269	0.539068	1
ACYP1	0.756173	0.693431	5.55448	0.0184335	1
ACYP2	0.867284	0.817518	5.30026	0.0213222	1
ADA	0.763374	0.695864	6.55079	0.0104838	1
ADAD1	0.839506	0.790754	4.42397	0.0354375	1
ADAD2	0.378601	0.459854	7.59403	0.00585619	1
ADAL	0.753086	0.654501	13.5541	0.000231786	1
ADAM10	0.787037	0.720195	6.85604	0.00883419	1
ADAM11	0.707819	0.547445	32.4042	1.25212e-08	0.000277646
ADAM12	0.806584	0.754258	4.47341	0.0344262	1
ADAM15	0.435185	0.403893	1.03238	0.309599	1
ADAM17	0.875514	0.822384	6.32785	0.0118856	1
ADAM18	0.59465	0.481752	14.4956	0.00014049	1
ADAM19	0.783951	0.70073	10.4931	0.00119823	1
ADAM1A	0.820988	0.788321	1.80556	0.179042	1
ADAM2	0.598765	0.474453	17.6315	2.68109e-05	0.594505
ADAM20	0.752058	0.698297	4.02526	0.0448236	1
ADAM20P1	0.752058	0.698297	4.02526	0.0448236	1
ADAM21	0.752058	0.698297	4.02526	0.0448236	1
ADAM21P1	0.756173	0.698297	4.72058	0.0298037	1
ADAM22	0.815844	0.756691	5.91437	0.0150178	1
ADAM23	0.869342	0.822384	4.77634	0.0288533	1
ADAM28	0.541152	0.430657	13.6722	0.000217649	1
ADAM29	0.816872	0.76399	4.74427	0.029396	1
ADAM30	0.816872	0.76399	4.74427	0.029396	1
ADAM32	0.597737	0.484185	14.688	0.00012685	1
ADAM33	0.782922	0.744526	2.20287	0.137754	1
ADAM5	0.592593	0.476886	15.2159	9.5891e-05	1
ADAM6	0.680041	0.649635	1.07593	0.29961	1
ADAM7	0.538066	0.430657	12.9057	0.000327589	1
ADAM8	0.8107	0.751825	5.75038	0.0164851	1
ADAM9	0.598765	0.479319	16.2714	5.48861e-05	1
ADAMDEC1	0.541152	0.430657	13.6722	0.000217649	1
ADAMTS1	0.829218	0.754258	9.94315	0.00161449	1
ADAMTS10	0.81893	0.739659	10.6709	0.00108836	1
ADAMTS12	0.81893	0.751825	7.68665	0.00556309	1
ADAMTS13	0.791152	0.727494	6.29817	0.0120863	1
ADAMTS14	0.83642	0.776156	6.66213	0.00984832	1
ADAMTS15	0.604938	0.547445	3.70717	0.0541791	1
ADAMTS16	0.797325	0.715328	10.6043	0.00112824	1
ADAMTS17	0.802469	0.734793	7.37735	0.00660505	1
ADAMTS18	0.381687	0.447689	4.96625	0.0258466	1
ADAMTS19	0.779835	0.695864	10.5585	0.00115653	1
ADAMTS2	0.797325	0.720195	9.3999	0.00216997	1
ADAMTS20	0.884774	0.819951	9.87787	0.00167279	1
ADAMTS3	0.865226	0.817518	4.81693	0.0281815	1
ADAMTS4	0.420782	0.403893	0.273234	0.601171	1
ADAMTS5	0.824074	0.746959	10.3044	0.00132715	1
ADAMTS6	0.765432	0.671533	12.6761	0.000370353	1
ADAMTS7	0.808642	0.746959	6.26506	0.0123142	1
ADAMTS7P1	0.804527	0.76399	2.645	0.103876	1
ADAMTS8	0.608025	0.545012	4.48213	0.0342511	1
ADAMTS9	0.77572	0.70073	8.34514	0.00386721	1
ADAMTS9-AS1	0.776749	0.703163	8.06017	0.0045249	1
ADAMTS9-AS2	0.762346	0.698297	5.87942	0.0153189	1
ADAMTSL1	0.745885	0.593674	31.1862	2.34423e-08	0.000519809
ADAMTSL2	0.792181	0.727494	6.52379	0.0106441	1
ADAMTSL3	0.799383	0.756691	2.88812	0.0892349	1
ADAMTSL4	0.442387	0.445255	0.00151506	0.968951	1
ADAMTSL4-AS1	0.442387	0.442822	1.393e-29	1	1
ADAMTSL5	0.76749	0.671533	13.2958	0.000266008	1
ADAP1	0.762346	0.712895	3.48637	0.0618761	1
ADAP2	0.694444	0.591241	13.327	0.000261612	1
ADAR	0.435185	0.411192	0.584738	0.444461	1
ADARB1	0.834362	0.778589	5.66156	0.0173407	1
ADARB2	0.816872	0.746959	8.27264	0.0040247	1
ADARB2-AS1	0.823045	0.766423	5.57086	0.0182618	1
ADAT1	0.376543	0.442822	5.03074	0.0249013	1
ADAT2	0.717078	0.6618	3.94887	0.046903	1
ADAT3	0.771605	0.6691	15.2905	9.21777e-05	1
ADCK1	0.745885	0.681265	5.75197	0.0164702	1
ADCK2	0.770576	0.754258	0.34264	0.558309	1
ADCK3	0.401235	0.367397	1.25032	0.263491	1
ADCK4	0.858025	0.817518	3.33334	0.0678889	1
ADCK5	0.54321	0.467153	6.39384	0.0114517	1
ADCY1	0.813786	0.768856	3.37453	0.0662115	1
ADCY10	0.427984	0.418491	0.0711923	0.789609	1
ADCY10P1	0.812757	0.812652	2.62374e-30	1	1
ADCY2	0.79321	0.712895	10.0522	0.00152166	1
ADCY3	0.832305	0.805353	1.26863	0.260023	1
ADCY4	0.825103	0.77129	5.07316	0.0242991	1
ADCY5	0.864198	0.827251	2.86043	0.0907831	1
ADCY6	0.851852	0.822384	1.67987	0.194942	1
ADCY7	0.418724	0.486618	5.13461	0.0234534	1
ADCY8	0.55144	0.452555	10.9274	0.0009475	1
ADCY9	0.570988	0.635036	4.63749	0.0312808	1
ADCYAP1	0.743827	0.673966	6.69594	0.00966325	1
ADCYAP1R1	0.805556	0.751825	4.7013	0.0301398	1
ADD1	0.8107	0.720195	13.4339	0.000247121	1
ADD2	0.909465	0.878345	2.7774	0.0956031	1
ADD3	0.819959	0.768856	4.4815	0.0342637	1
ADGB	0.720165	0.678832	2.19074	0.138843	1
ADH1A	0.849794	0.793187	6.25216	0.0124042	1
ADH1B	0.849794	0.793187	6.25216	0.0124042	1
ADH1C	0.849794	0.793187	6.25216	0.0124042	1
ADH4	0.847737	0.793187	5.75236	0.0164666	1
ADH5	0.847737	0.793187	5.75236	0.0164666	1
ADH6	0.849794	0.793187	6.25216	0.0124042	1
ADH7	0.849794	0.793187	6.25216	0.0124042	1
ADHFE1	0.623457	0.552311	5.81061	0.0159298	1
ADI1	0.863169	0.815085	4.83798	0.0278394	1
ADIG	0.770576	0.717762	4.07374	0.0435547	1
ADIPOQ	0.824074	0.781022	3.22139	0.0726819	1
ADIPOQ-AS1	0.824074	0.781022	3.22139	0.0726819	1
ADIPOR1	0.398148	0.367397	1.02354	0.311681	1
ADIPOR2	0.773663	0.70073	7.85205	0.0050763	1
ADIRF	0.813786	0.759124	5.01206	0.0251713	1
ADK	0.788066	0.73236	4.77376	0.0288966	1
ADM	0.789095	0.708029	10.1131	0.00147217	1
ADM2	0.653292	0.622871	1.03742	0.308423	1
ADM5	0.835391	0.785888	4.47949	0.034304	1
ADNP	0.743827	0.671533	7.1712	0.0074083	1
ADNP2	0.751029	0.635036	18.5682	1.63934e-05	0.363508
ADO	0.847737	0.781022	8.56166	0.00343317	1
ADORA1	0.397119	0.364964	1.12652	0.288518	1
ADORA2A	0.690329	0.642336	2.82292	0.0929271	1
ADORA2A-AS1	0.687243	0.635036	3.33747	0.0677186	1
ADORA2B	0.547325	0.399027	24.8221	6.28716e-07	0.0139411
ADORA3	0.80144	0.744526	5.20365	0.0225395	1
ADPGK	0.813786	0.749392	6.9509	0.00837769	1
ADPGK-AS1	0.813786	0.749392	6.9509	0.00837769	1
ADPRH	0.868313	0.836983	2.08943	0.148321	1
ADPRHL1	0.669753	0.574209	11.0522	0.000885805	1
ADPRHL2	0.802469	0.705596	14.933	0.000111397	1
ADPRM	0.524691	0.386861	21.4248	3.67984e-06	0.0815968
ADRA1A	0.537037	0.440389	10.4124	0.0012517	1
ADRA1B	0.790123	0.70073	12.2955	0.000454045	1
ADRA1D	0.788066	0.742092	3.23642	0.072018	1
ADRA2A	0.817901	0.781022	2.29069	0.130152	1
ADRA2B	0.923868	0.892944	3.15446	0.0757198	1
ADRA2C	0.81893	0.722628	15.5895	7.86916e-05	1
ADRB1	0.813786	0.773723	2.67166	0.10215	1
ADRB2	0.79321	0.703163	12.5863	0.000388574	1
ADRBK1	0.77572	0.759124	0.361286	0.547793	1
ADRBK2	0.682099	0.625304	3.93271	0.0473556	1
ADRM1	0.675926	0.59854	7.29583	0.00691149	1
ADSL	0.645062	0.596107	2.76512	0.0963397	1
ADSS	0.397119	0.381995	0.217282	0.641119	1
ADSSL1	0.733539	0.671533	5.1513	0.023229	1
ADTRP	0.834362	0.783455	4.71705	0.029865	1
AEBP1	0.81893	0.773723	3.48499	0.0619278	1
AEBP2	0.805556	0.710462	14.545	0.00013685	1
AEN	0.804527	0.749392	4.93384	0.0263358	1
AES	0.781893	0.681265	15.1484	9.93807e-05	1
AFAP1	0.794239	0.727494	6.98872	0.00820251	1
AFAP1-AS1	0.79321	0.727494	6.75396	0.00935397	1
AFAP1L1	0.792181	0.698297	13.6163	0.000224229	1
AFAP1L2	0.813786	0.77129	3.01331	0.0825835	1
AFF1	0.847737	0.781022	8.56166	0.00343317	1
AFF2	0.729424	0.698297	1.23862	0.265737	1
AFF3	0.903292	0.871046	2.83153	0.0924302	1
AFF4	0.771605	0.686131	10.6964	0.00107346	1
AFG3L1P	0.375514	0.450122	6.40465	0.0113822	1
AFG3L2	0.788066	0.708029	9.8316	0.00171539	1
AFM	0.863169	0.810219	5.8611	0.0154791	1
AFMID	0.703704	0.620438	8.80983	0.00299611	1
AFP	0.86214	0.812652	5.09557	0.0239871	1
AFTPH	0.898148	0.83455	10.4136	0.00125087	1
AGA	0.815844	0.761557	4.98117	0.0256246	1
AGAP1	0.842593	0.807786	2.26353	0.132452	1
AGAP1-IT1	0.847737	0.822384	1.20043	0.273235	1
AGAP11	0.813786	0.756691	5.46888	0.019358	1
AGAP2	0.868313	0.807786	7.84598	0.00509339	1
AGAP2-AS1	0.868313	0.807786	7.84598	0.00509339	1
AGAP3	0.770576	0.756691	0.238382	0.625377	1
AGAP5	0.79321	0.749392	2.98356	0.0841139	1
AGAP6	0.852881	0.781022	10.1404	0.00145051	1
AGAP9	0.848765	0.778589	9.49817	0.00205677	1
AGBL1	0.79321	0.73236	5.79198	0.0160995	1
AGBL1-AS1	0.809671	0.756691	4.63715	0.0312869	1
AGBL2	0.823045	0.776156	3.81397	0.0508269	1
AGBL3	0.778807	0.761557	0.397282	0.528496	1
AGBL4	0.751029	0.683698	6.32176	0.0119265	1
AGBL4-IT1	0.784979	0.715328	7.39662	0.00653466	1
AGBL5	0.865226	0.846715	0.674425	0.411513	1
AGBL5-AS1	0.866255	0.846715	0.762954	0.382406	1
AGER	0.861111	0.832117	1.70744	0.191318	1
AGFG1	0.853909	0.815085	2.99323	0.0836132	1
AGFG2	0.789095	0.744526	3.04811	0.0808313	1
AGGF1	0.777778	0.6618	19.7603	8.77876e-06	0.19466
AGK	0.776749	0.761557	0.297573	0.585408	1
AGL	0.756173	0.705596	3.59234	0.0580464	1
AGMAT	0.754115	0.6618	11.9337	0.00055129	1
AGMO	0.787037	0.749392	2.14242	0.143275	1
AGO1	0.798354	0.705596	13.5473	0.000232625	1
AGO2	0.554527	0.469586	8.02755	0.0046071	1
AGO3	0.799383	0.705596	13.8861	0.000194231	1
AGO4	0.798354	0.705596	13.5473	0.000232625	1
AGPAT1	0.859053	0.83455	1.18648	0.276041	1
AGPAT2	0.797325	0.739659	5.26986	0.0216977	1
AGPAT3	0.839506	0.793187	3.99099	0.0457442	1
AGPAT4	0.72428	0.676399	2.98824	0.0838714	1
AGPAT5	0.534979	0.43309	11.592	0.000662351	1
AGPS	0.891975	0.849148	4.59492	0.0320668	1
AGR2	0.795267	0.751825	2.95157	0.0857943	1
AGR3	0.795267	0.749392	3.29805	0.0693623	1
AGRN	0.770576	0.705596	6.18393	0.0128916	1
AGRP	0.382716	0.447689	4.80568	0.028366	1
AGT	0.406379	0.355231	2.96186	0.0852496	1
AGTPBP1	0.812757	0.739659	8.90038	0.00285111	1
AGTR1	0.840535	0.79562	3.76829	0.0522331	1
AGTR2	0.751029	0.690998	5.01889	0.0250723	1
AGTRAP	0.75	0.673966	8.04276	0.00456859	1
AGXT	0.847737	0.79562	5.25259	0.0219141	1
AGXT2	0.81893	0.756691	6.62065	0.0100803	1
AHCTF1	0.401235	0.399027	0.000273552	0.986804	1
AHCTF1P1	0.895062	0.854015	4.3176	0.0377201	1
AHCY	0.795267	0.751825	2.95157	0.0857943	1
AHCYL1	0.789095	0.746959	2.71794	0.0992263	1
AHCYL2	0.766461	0.754258	0.175092	0.675625	1
AHDC1	0.745885	0.63747	16.0886	6.04466e-05	1
AHI1	0.709877	0.659367	3.2415	0.0717949	1
AHNAK	0.807613	0.766423	2.76338	0.0964444	1
AHNAK2	0.733539	0.671533	5.1513	0.023229	1
AHR	0.795267	0.749392	3.29805	0.0693623	1
AHRR	0.772634	0.710462	5.69145	0.0170477	1
AHSA1	0.745885	0.681265	5.75197	0.0164702	1
AHSA2	0.839506	0.79562	3.57904	0.0585129	1
AHSG	0.823045	0.783455	2.70422	0.100083	1
AHSP	0.608025	0.6618	3.33481	0.0678281	1
AICDA	0.808642	0.722628	12.0799	0.000509682	1
AIDA	0.391975	0.367397	0.637054	0.424779	1
AIF1	0.858025	0.839416	0.654353	0.418561	1
AIF1L	0.811728	0.739659	8.62369	0.00331819	1
AIFM1	0.740741	0.698297	2.41868	0.119896	1
AIFM2	0.84465	0.781022	7.69115	0.00554922	1
AIFM3	0.701646	0.656934	2.48752	0.114753	1
AIG1	0.715021	0.659367	3.98798	0.045826	1
AIM1	0.679012	0.642336	1.59086	0.207204	1
AIM1L	0.75	0.656934	12.0145	0.000527883	1
AIM2	0.43107	0.403893	0.766325	0.381356	1
AIMP1	0.842593	0.783455	6.59407	0.0102319	1
AIMP2	0.774691	0.744526	1.30194	0.253859	1
AIP	0.774691	0.749392	0.898317	0.343233	1
AIPL1	0.531893	0.408759	17.0311	3.67726e-05	0.815396
AIRE	0.837449	0.790754	4.01915	0.0449864	1
AIRN	0.722222	0.683698	1.90216	0.167837	1
AJAP1	0.765432	0.705596	5.16906	0.0229926	1
AJUBA	0.796296	0.756691	2.45118	0.117437	1
AK1	0.799383	0.756691	2.88812	0.0892349	1
AK2	0.80144	0.703163	15.3081	9.13258e-05	1
AK3	0.733539	0.581509	30.4181	3.48266e-08	0.000772245
AK4	0.796296	0.727494	7.47212	0.00626616	1
AK5	0.794239	0.727494	6.98872	0.00820251	1
AK7	0.765432	0.683698	9.63683	0.00190714	1
AK8	0.799383	0.737226	6.16459	0.0130333	1
AK9	0.695473	0.652068	2.31541	0.128098	1
AKAP1	0.697531	0.600973	11.7269	0.000616023	1
AKAP10	0.578189	0.459854	15.8271	6.93996e-05	1
AKAP11	0.653292	0.576642	6.95946	0.00833771	1
AKAP12	0.722222	0.673966	3.02375	0.0820537	1
AKAP13	0.80144	0.754258	3.56493	0.0590122	1
AKAP14	0.742798	0.678832	5.59637	0.0179978	1
AKAP2	0.788066	0.734793	4.36281	0.0367317	1
AKAP3	0.814815	0.720195	14.8529	0.000116232	1
AKAP4	0.766461	0.710462	4.5348	0.0332124	1
AKAP5	0.761317	0.698297	5.67644	0.0171942	1
AKAP6	0.813786	0.76399	4.15506	0.0415103	1
AKAP7	0.704733	0.664234	2.03949	0.153261	1
AKAP8	0.832305	0.754258	10.8924	0.000965595	1
AKAP8L	0.831276	0.754258	10.5701	0.00114929	1
AKAP9	0.796296	0.754258	2.76949	0.0960766	1
AKIP1	0.791152	0.708029	10.6902	0.00107703	1
AKIRIN1	0.798354	0.717762	10.2829	0.00134269	1
AKIRIN2	0.705761	0.656934	3.00202	0.0831607	1
AKNA	0.807613	0.742092	7.03944	0.00797339	1
AKNAD1	0.788066	0.756691	1.47321	0.22484	1
AKR1A1	0.788066	0.70073	11.6759	0.000633137	1
AKR1B1	0.781893	0.749392	1.55494	0.212408	1
AKR1B10	0.778807	0.749392	1.25028	0.263498	1
AKR1B15	0.778807	0.749392	1.25028	0.263498	1
AKR1C1	0.824074	0.761557	6.81239	0.00905278	1
AKR1C2	0.826132	0.761557	7.32279	0.00680858	1
AKR1C3	0.823045	0.761557	6.56525	0.0103989	1
AKR1C4	0.825103	0.759124	7.61044	0.00580312	1
AKR1C6P	0.825103	0.761557	7.06488	0.00786095	1
AKR1D1	0.760288	0.749392	0.131931	0.716438	1
AKR1E2	0.822016	0.761557	6.32341	0.0119154	1
AKR7A2	0.759259	0.673966	10.3285	0.0013099	1
AKR7A2P1	0.796296	0.734793	5.97555	0.0145056	1
AKR7A3	0.759259	0.676399	9.75272	0.00179058	1
AKR7L	0.760288	0.676399	10.0191	0.00154925	1
AKT1	0.733539	0.671533	5.1513	0.023229	1
AKT1S1	0.834362	0.788321	3.85378	0.0496341	1
AKT2	0.852881	0.812652	3.20034	0.073623	1
AKT3	0.398148	0.379562	0.344125	0.557458	1
AKTIP	0.415638	0.484185	5.24422	0.0220198	1
ALAD	0.776749	0.744526	1.50364	0.220112	1
ALAS1	0.760288	0.683698	8.36199	0.00383152	1
ALAS2	0.754115	0.695864	4.75847	0.0291545	1
ALB	0.86214	0.812652	5.09557	0.0239871	1
ALCAM	0.869342	0.846715	1.06422	0.302254	1
ALDH16A1	0.835391	0.790754	3.63635	0.0565308	1
ALDH18A1	0.825103	0.781022	3.39379	0.0654424	1
ALDH1A1	0.814815	0.73236	11.3583	0.000751098	1
ALDH1A2	0.804527	0.727494	9.59642	0.00194957	1
ALDH1A3	0.803498	0.746959	5.17098	0.0229672	1
ALDH1B1	0.790123	0.681265	18.0603	2.1402e-05	0.474567
ALDH1L1	0.843621	0.800487	3.5227	0.0605338	1
ALDH1L1-AS1	0.855967	0.812652	3.77595	0.0519945	1
ALDH1L1-AS2	0.841564	0.800487	3.15981	0.075472	1
ALDH1L2	0.846708	0.800487	4.10956	0.0426414	1
ALDH2	0.81893	0.783455	2.12343	0.145061	1
ALDH3A1	0.574074	0.462287	14.0891	0.000174353	1
ALDH3A2	0.573045	0.462287	13.8236	0.000200794	1
ALDH3B1	0.763374	0.742092	0.600324	0.438454	1
ALDH3B2	0.773663	0.756691	0.377269	0.539068	1
ALDH4A1	0.75823	0.676399	9.49045	0.00206545	1
ALDH5A1	0.840535	0.798054	3.36677	0.066524	1
ALDH6A1	0.729424	0.652068	7.96596	0.00476652	1
ALDH7A1	0.756173	0.690998	5.9957	0.0143407	1
ALDH8A1	0.712963	0.652068	4.76879	0.0289803	1
ALDH9A1	0.412551	0.391727	0.436515	0.508809	1
ALDOA	0.602881	0.656934	3.35294	0.067085	1
ALDOB	0.79321	0.734793	5.33724	0.0208745	1
ALDOC	0.720165	0.596107	19.9741	7.85002e-06	0.174066
ALG1	0.565844	0.644769	7.11205	0.00765676	1
ALG10	0.867284	0.788321	13.0737	0.000299472	1
ALG10B	0.880658	0.810219	11.3075	0.000771934	1
ALG11	0.665638	0.583942	8.03023	0.00460029	1
ALG12	0.649177	0.620438	0.915222	0.338733	1
ALG13	0.756173	0.693431	5.55448	0.0184335	1
ALG14	0.764403	0.739659	0.831744	0.361769	1
ALG1L	0.854938	0.812652	3.57801	0.0585491	1
ALG1L2	0.822016	0.793187	1.39778	0.237096	1
ALG1L9P	0.752058	0.710462	2.38409	0.122576	1
ALG2	0.800412	0.725061	9.06501	0.00260547	1
ALG3	0.823045	0.778589	3.42398	0.064256	1
ALG5	0.68107	0.591241	9.91259	0.00164152	1
ALG6	0.790123	0.722628	7.0557	0.00790134	1
ALG8	0.688272	0.647202	2.04118	0.153091	1
ALG9	0.590535	0.542579	2.52771	0.111862	1
ALK	0.858025	0.83455	1.07736	0.299289	1
ALKBH1	0.743827	0.678832	5.79232	0.0160964	1
ALKBH2	0.833333	0.798054	2.23037	0.135321	1
ALKBH3	0.834362	0.776156	6.16384	0.0130388	1
ALKBH3-AS1	0.838477	0.781022	6.11431	0.0134092	1
ALKBH4	0.796296	0.749392	3.46183	0.0628006	1
ALKBH5	0.566872	0.440389	18.0441	2.1585e-05	0.478625
ALKBH6	0.856996	0.815085	3.55193	0.0594763	1
ALKBH7	0.8107	0.734793	9.51824	0.0020344	1
ALKBH8	0.600823	0.552311	2.60643	0.106431	1
ALLC	0.86214	0.812652	5.09557	0.0239871	1
ALMS1	0.908436	0.868613	4.52109	0.0334795	1
ALMS1-IT1	0.907407	0.868613	4.25388	0.0391608	1
ALOX12	0.524691	0.406326	15.725	7.32505e-05	1
ALOX12B	0.521605	0.396594	17.5774	2.75854e-05	0.61168
ALOX12P2	0.52572	0.406326	16.0027	6.3253e-05	1
ALOX15	0.536008	0.418491	15.4903	8.29318e-05	1
ALOX15B	0.521605	0.394161	18.2797	1.90729e-05	0.422922
ALOX5	0.867284	0.817518	5.30026	0.0213222	1
ALOX5AP	0.707819	0.632603	7.23478	0.00715048	1
ALOXE3	0.519547	0.394161	17.6897	2.60032e-05	0.576594
ALPI	0.838477	0.807786	1.71186	0.190744	1
ALPK1	0.841564	0.793187	4.39669	0.0360088	1
ALPK2	0.762346	0.647202	18.7688	1.4756e-05	0.327199
ALPK3	0.80144	0.751825	3.94703	0.0469542	1
ALPL	0.748971	0.676399	7.31077	0.00685426	1
ALPP	0.838477	0.805353	2.00484	0.156798	1
ALPPL2	0.839506	0.807786	1.84185	0.174734	1
ALS2	0.853909	0.790754	7.91577	0.00490057	1
ALS2CL	0.764403	0.695864	6.76981	0.00927128	1
ALS2CR11	0.853909	0.788321	8.52532	0.00350239	1
ALS2CR12	0.853909	0.783455	9.80566	0.00173976	1
ALX1	0.843621	0.785888	6.31663	0.0119611	1
ALX3	0.789095	0.749392	2.40601	0.12087	1
ALX4	0.806584	0.768856	2.29976	0.129394	1
ALYREF	0.704733	0.615572	10.1178	0.00146844	1
AMACR	0.81893	0.751825	7.68665	0.00556309	1
AMBN	0.863169	0.832117	1.99107	0.158229	1
AMBP	0.799383	0.754258	3.23345	0.0721487	1
AMBRA1	0.832305	0.776156	5.68806	0.0170808	1
AMD1	0.686214	0.622871	4.93971	0.0262465	1
AMDHD1	0.830247	0.776156	5.23434	0.0221452	1
AMDHD2	0.569959	0.63017	4.07744	0.0434595	1
AMELX	0.768519	0.70073	6.69355	0.00967621	1
AMER1	0.753086	0.720195	1.47003	0.225341	1
AMER2	0.705761	0.647202	4.34858	0.0370399	1
AMER3	0.893004	0.849148	4.85295	0.0275988	1
AMFR	0.404321	0.484185	7.20279	0.00727903	1
AMHR2	0.87037	0.817518	6.07741	0.0136922	1
AMIGO1	0.791152	0.742092	3.72923	0.0534679	1
AMIGO2	0.878601	0.812652	9.83536	0.00171189	1
AMIGO3	0.75	0.676399	7.53717	0.00604388	1
AMMECR1	0.754115	0.693431	5.16786	0.0230086	1
AMMECR1L	0.883745	0.83455	5.72106	0.0167626	1
AMN	0.764403	0.703163	5.40149	0.0201196	1
AMN1	0.782922	0.717762	6.43722	0.0111753	1
AMOT	0.753086	0.690998	5.39807	0.020159	1
AMOTL1	0.622428	0.593674	0.889919	0.345499	1
AMOTL2	0.843621	0.810219	2.08982	0.148283	1
AMPD1	0.812757	0.749392	6.70704	0.00960328	1
AMPD2	0.790123	0.739659	3.93572	0.047271	1
AMPD3	0.784979	0.70073	10.7818	0.00102501	1
AMPH	0.81893	0.768856	4.28467	0.0384576	1
AMT	0.752058	0.676399	8.00168	0.0046734	1
AMTN	0.865226	0.832117	2.29923	0.129438	1
AMY2B	0.769547	0.73236	1.98242	0.159136	1
AMZ1	0.780864	0.744526	1.95389	0.162169	1
AMZ2	0.693416	0.608273	9.06368	0.00260737	1
AMZ2P1	0.6893	0.588808	12.5456	0.00039714	1
ANAPC1	0.896091	0.871046	1.5866	0.207813	1
ANAPC10	0.839506	0.798054	3.18832	0.0741662	1
ANAPC11	0.703704	0.615572	9.86945	0.00168045	1
ANAPC13	0.845679	0.812652	2.06217	0.150995	1
ANAPC15	0.760288	0.705596	4.25426	0.039152	1
ANAPC16	0.80144	0.751825	3.94703	0.0469542	1
ANAPC1P1	0.914609	0.873479	5.09035	0.0240593	1
ANAPC2	0.795267	0.739659	4.86634	0.0273855	1
ANAPC4	0.809671	0.708029	16.7739	4.21076e-05	0.933694
ANAPC5	0.789095	0.744526	3.04811	0.0808313	1
ANAPC7	0.823045	0.798054	1.03927	0.30799	1
ANG	0.811728	0.759124	4.60548	0.03187	1
ANGEL1	0.759259	0.690998	6.62853	0.0100358	1
ANGEL2	0.408436	0.399027	0.0706397	0.790408	1
ANGPT1	0.552469	0.459854	9.56764	0.00198037	1
ANGPT2	0.534979	0.430657	12.1618	0.000487793	1
ANGPT4	0.762346	0.703163	5.01562	0.0251197	1
ANGPTL1	0.437243	0.425791	0.111134	0.738857	1
ANGPTL2	0.795267	0.756691	2.31419	0.128198	1
ANGPTL3	0.794239	0.703163	12.9091	0.000326984	1
ANGPTL4	0.81893	0.744526	9.42313	0.00214266	1
ANGPTL5	0.596708	0.569343	0.783826	0.375974	1
ANGPTL6	0.819959	0.751825	7.95192	0.00480365	1
ANGPTL7	0.744856	0.671533	7.39371	0.00654522	1
ANK1	0.618313	0.513382	12.691	0.000367419	1
ANK2	0.830247	0.773723	5.71496	0.0168209	1
ANK3	0.84465	0.768856	10.8352	0.000995911	1
ANKAR	0.888889	0.839416	5.98624	0.0144179	1
ANKDD1A	0.81893	0.749392	8.24728	0.00408131	1
ANKDD1B	0.776749	0.666667	17.8066	2.44537e-05	0.542236
ANKEF1	0.776749	0.729927	3.24627	0.0715864	1
ANKFN1	0.696502	0.610706	9.24712	0.00235866	1
ANKFY1	0.537037	0.423358	14.4811	0.000141576	1
ANKH	0.80144	0.717762	11.18	0.000826831	1
ANKHD1	0.788066	0.681265	17.3031	3.18669e-05	0.706616
ANKHD1-EIF4EBP3	0.788066	0.681265	17.3031	3.18669e-05	0.706616
ANKIB1	0.799383	0.754258	3.23345	0.0721487	1
ANKK1	0.58642	0.537713	2.60365	0.106618	1
ANKLE1	0.841564	0.776156	8.00943	0.00465344	1
ANKLE2	0.822016	0.773723	4.03158	0.0446561	1
ANKMY1	0.842593	0.80292	2.95824	0.0854409	1
ANKMY2	0.79321	0.754258	2.34463	0.125715	1
ANKRA2	0.778807	0.6691	17.7827	2.47629e-05	0.549092
ANKRD1	0.814815	0.766423	3.93706	0.0472331	1
ANKRD10	0.669753	0.586375	8.40948	0.0037327	1
ANKRD11	0.375514	0.450122	6.40465	0.0113822	1
ANKRD12	0.772634	0.681265	12.2323	0.000469684	1
ANKRD13A	0.824074	0.79562	1.37164	0.24153	1
ANKRD13B	0.691358	0.596107	11.308	0.000771756	1
ANKRD13C	0.799383	0.734793	6.65525	0.00988641	1
ANKRD13D	0.77572	0.759124	0.361286	0.547793	1
ANKRD16	0.822016	0.746959	9.69665	0.00184604	1
ANKRD17	0.86214	0.810219	5.60624	0.0178966	1
ANKRD18A	0.792181	0.681265	18.8374	1.42345e-05	0.315636
ANKRD18B	0.773663	0.659367	19.0087	1.30123e-05	0.288534
ANKRD18DP	0.794239	0.756691	2.18149	0.139679	1
ANKRD19P	0.805556	0.727494	9.88405	0.00166718	1
ANKRD2	0.819959	0.781022	2.58148	0.108121	1
ANKRD20A1	0.799383	0.734793	6.65525	0.00988641	1
ANKRD20A11P	0.824074	0.768856	5.31969	0.0210857	1
ANKRD20A19P	0.70679	0.647202	4.5132	0.0336343	1
ANKRD20A2	0.779835	0.690998	11.7981	0.000592904	1
ANKRD20A3	0.770576	0.676399	12.9148	0.000325995	1
ANKRD20A4	0.798354	0.729927	7.4401	0.00637865	1
ANKRD20A5P	0.787037	0.698297	12.0121	0.000528575	1
ANKRD20A8P	0.919753	0.885645	3.68318	0.054964	1
ANKRD20A9P	0.699588	0.63017	6.07149	0.0137381	1
ANKRD22	0.813786	0.744526	8.03054	0.00459951	1
ANKRD23	0.921811	0.885645	4.22722	0.0397807	1
ANKRD24	0.799383	0.70073	15.3249	9.05169e-05	1
ANKRD26	0.835391	0.793187	3.24598	0.0715991	1
ANKRD26P1	0.429012	0.49635	5.02557	0.0249758	1
ANKRD26P3	0.701646	0.63017	6.46163	0.0110228	1
ANKRD27	0.865226	0.810219	6.39125	0.0114684	1
ANKRD28	0.824074	0.773723	4.42115	0.0354961	1
ANKRD29	0.784979	0.673966	18.4971	1.7016e-05	0.377313
ANKRD30A	0.86214	0.822384	3.28156	0.0700622	1
ANKRD30B	0.787037	0.698297	12.0121	0.000528575	1
ANKRD30BL	0.886831	0.836983	5.99257	0.0143662	1
ANKRD30BP2	0.817901	0.754258	6.89411	0.00864802	1
ANKRD30BP3	0.865226	0.817518	4.81693	0.0281815	1
ANKRD31	0.778807	0.664234	19.3491	1.08872e-05	0.241412
ANKRD33	0.859053	0.80292	6.43859	0.0111667	1
ANKRD33B	0.798354	0.710462	12.1918	0.000480009	1
ANKRD34A	0.462963	0.476886	0.172489	0.677909	1
ANKRD34B	0.770576	0.671533	14.258	0.00015938	1
ANKRD34C	0.8107	0.754258	5.28479	0.0215124	1
ANKRD35	0.465021	0.474453	0.0688091	0.793079	1
ANKRD36	0.906379	0.871046	3.49633	0.0615052	1
ANKRD36B	0.915638	0.878345	4.23114	0.0396889	1
ANKRD36BP1	0.427984	0.418491	0.0711923	0.789609	1
ANKRD36BP2	0.918724	0.868613	7.77864	0.00528675	1
ANKRD36C	0.919753	0.892944	2.25863	0.132872	1
ANKRD37	0.79321	0.729927	6.26425	0.0123198	1
ANKRD39	0.921811	0.885645	4.22722	0.0397807	1
ANKRD40	0.704733	0.593674	15.6574	7.59169e-05	1
ANKRD42	0.673868	0.627737	2.53823	0.11112	1
ANKRD44	0.866255	0.829684	2.83455	0.0922566	1
ANKRD44-IT1	0.868313	0.83455	2.43663	0.118531	1
ANKRD45	0.42284	0.399027	0.579855	0.446369	1
ANKRD46	0.56893	0.476886	9.48995	0.002066	1
ANKRD49	0.619342	0.600973	0.337327	0.561376	1
ANKRD50	0.842593	0.793187	4.60804	0.0318224	1
ANKRD52	0.861111	0.817518	3.93053	0.047417	1
ANKRD53	0.911523	0.878345	3.22152	0.0726761	1
ANKRD54	0.65535	0.596107	4.13559	0.0419904	1
ANKRD55	0.766461	0.695864	7.22007	0.0072093	1
ANKRD6	0.696502	0.647202	3.01312	0.082593	1
ANKRD60	0.685185	0.639903	2.48466	0.114962	1
ANKRD61	0.77572	0.744526	1.40086	0.236579	1
ANKRD62	0.787037	0.70073	11.3732	0.000745101	1
ANKRD62P1-PARP4P3	0.673868	0.63017	2.27001	0.131899	1
ANKRD63	0.765432	0.6691	13.3306	0.00026111	1
ANKRD65	0.770576	0.705596	6.18393	0.0128916	1
ANKRD66	0.832305	0.827251	0.0226907	0.880264	1
ANKRD7	0.790123	0.76399	1.01017	0.314861	1
ANKRD9	0.764403	0.70073	5.84124	0.0156548	1
ANKS1A	0.848765	0.827251	0.851472	0.356136	1
ANKS1B	0.807613	0.778589	1.3398	0.24707	1
ANKS3	0.572016	0.63747	4.85411	0.0275803	1
ANKS4B	0.592593	0.664234	5.95608	0.0146666	1
ANKS6	0.796296	0.722628	8.55654	0.00344283	1
ANKUB1	0.840535	0.790754	4.63479	0.03133	1
ANKZF1	0.868313	0.839416	1.76762	0.183676	1
ANLN	0.817901	0.768856	4.09283	0.0430655	1
ANO1	0.685185	0.654501	1.10568	0.293024	1
ANO1-AS2	0.688272	0.656934	1.16159	0.281137	1
ANO10	0.787037	0.722628	6.36701	0.0116261	1
ANO2	0.79321	0.710462	10.6609	0.00109422	1
ANO3	0.80144	0.759124	2.85667	0.0909957	1
ANO4	0.845679	0.79562	4.79938	0.0284699	1
ANO5	0.822016	0.766423	5.34885	0.020736	1
ANO6	0.873457	0.817518	6.91938	0.00852667	1
ANO7	0.848765	0.800487	4.5299	0.0333076	1
ANO8	0.842593	0.781022	7.14165	0.00753138	1
ANO9	0.777778	0.676399	15.2027	9.6567e-05	1
ANP32A	0.823045	0.761557	6.56525	0.0103989	1
ANP32AP1	0.777778	0.710462	6.76904	0.00927526	1
ANP32B	0.798354	0.720195	9.68018	0.00186266	1
ANP32C	0.826132	0.77129	5.29089	0.0214373	1
ANP32D	0.861111	0.827251	2.35232	0.125097	1
ANP32E	0.447531	0.452555	0.0126605	0.910412	1
ANPEP	0.794239	0.729927	6.49017	0.0108472	1
ANTXR1	0.903292	0.861314	4.8108	0.0282819	1
ANTXR2	0.86214	0.790754	10.4768	0.00120883	1
ANTXRL	0.792181	0.749392	2.8328	0.0923573	1
ANTXRLP1	0.792181	0.751825	2.51292	0.112916	1
ANXA1	0.814815	0.739659	9.46934	0.00208934	1
ANXA10	0.815844	0.773723	2.98261	0.0841636	1
ANXA11	0.834362	0.778589	5.66156	0.0173407	1
ANXA13	0.558642	0.447689	13.8203	0.000201156	1
ANXA2	0.804527	0.742092	6.32753	0.0118878	1
ANXA2P1	0.82716	0.783455	3.36381	0.0666439	1
ANXA2P2	0.773663	0.6618	18.2287	1.95903e-05	0.434396
ANXA2P3	0.846708	0.778589	8.87673	0.00288829	1
ANXA2R	0.832305	0.783455	4.3038	0.0380274	1
ANXA3	0.863169	0.793187	10.1335	0.001456	1
ANXA4	0.904321	0.858881	5.674	0.0172181	1
ANXA5	0.839506	0.790754	4.42397	0.0354375	1
ANXA6	0.794239	0.695864	15.0076	0.00010708	1
ANXA7	0.794239	0.744526	3.86876	0.0491929	1
ANXA8	0.848765	0.778589	9.49817	0.00205677	1
ANXA8L1	0.809671	0.759124	4.21827	0.039991	1
ANXA9	0.446502	0.435523	0.100109	0.751699	1
AOAH	0.816872	0.77129	3.51581	0.0607861	1
AOAH-IT1	0.817901	0.77129	3.69298	0.0546421	1
AOC1	0.772634	0.759124	0.225342	0.634999	1
AOC2	0.700617	0.540146	32.12	1.44935e-08	0.000321379
AOC3	0.700617	0.540146	32.12	1.44935e-08	0.000321379
AOC4P	0.700617	0.540146	32.12	1.44935e-08	0.000321379
AOX1	0.876543	0.817518	7.82885	0.00514189	1
AOX2P	0.86214	0.800487	7.87016	0.00502573	1
AP1AR	0.842593	0.793187	4.60804	0.0318224	1
AP1B1	0.666667	0.622871	2.25767	0.132954	1
AP1B1P1	0.658436	0.622871	1.44946	0.228615	1
AP1G1	0.38786	0.445255	3.71448	0.0539424	1
AP1G2	0.823045	0.761557	6.56525	0.0103989	1
AP1M1	0.843621	0.773723	9.20833	0.00240917	1
AP1M2	0.814815	0.754258	6.1742	0.0129627	1
AP1S1	0.786008	0.742092	2.92911	0.0869955	1
AP1S2	0.776749	0.705596	7.5386	0.00603911	1
AP1S3	0.864198	0.815085	5.07511	0.0242718	1
AP2A1	0.834362	0.785888	4.27517	0.0386732	1
AP2A2	0.779835	0.676399	15.8975	6.68665e-05	1
AP2B1	0.69856	0.562044	23.319	1.37236e-06	0.0304307
AP2M1	0.820988	0.778589	3.08422	0.0790549	1
AP2S1	0.851852	0.79562	6.23181	0.0125476	1
AP3B1	0.777778	0.659367	20.573	5.73988e-06	0.127276
AP3B2	0.807613	0.76399	3.10653	0.077979	1
AP3D1	0.770576	0.671533	14.258	0.00015938	1
AP3M1	0.791152	0.744526	3.36343	0.0666593	1
AP3M2	0.624486	0.518248	13.0706	0.000299972	1
AP3S1	0.780864	0.681265	14.806	0.000119155	1
AP3S2	0.789095	0.727494	5.86043	0.015485	1
AP4B1	0.807613	0.744526	6.52899	0.010613	1
AP4B1-AS1	0.807613	0.742092	7.03944	0.00797339	1
AP4E1	0.772634	0.703163	7.10707	0.00767807	1
AP4M1	0.789095	0.751825	2.11245	0.146105	1
AP4S1	0.802469	0.742092	5.87702	0.0153398	1
AP5B1	0.794239	0.785888	0.0767705	0.781723	1
AP5M1	0.789095	0.756691	1.58094	0.208625	1
AP5S1	0.784979	0.744526	2.46808	0.11618	1
AP5Z1	0.777778	0.751825	0.957137	0.327909	1
APAF1	0.837449	0.788321	4.45157	0.0348691	1
APBA1	0.806584	0.734793	8.40789	0.00373596	1
APBA2	0.784979	0.712895	7.91927	0.00489111	1
APBA3	0.796296	0.70073	14.2703	0.00015834	1
APBB1	0.79321	0.703163	12.5863	0.000388574	1
APBB1IP	0.838477	0.798054	3.01533	0.0824806	1
APBB2	0.765432	0.673966	12.0371	0.000521521	1
APBB3	0.789095	0.681265	17.6792	2.61469e-05	0.579782
APC	0.773663	0.676399	13.8682	0.000196084	1
APC2	0.765432	0.671533	12.6761	0.000370353	1
APCDD1	0.784979	0.695864	12.0415	0.0005203	1
APCDD1L	0.688272	0.635036	3.47883	0.0621585	1
APCDD1L-AS1	0.688272	0.63017	4.15788	0.0414412	1
APCS	0.427984	0.403893	0.592522	0.441445	1
APEH	0.75	0.676399	7.53717	0.00604388	1
APEX1	0.814815	0.759124	5.22273	0.0222936	1
APEX2	0.756173	0.70073	4.32807	0.0374887	1
APH1A	0.446502	0.454988	0.0532736	0.817462	1
APH1B	0.813786	0.739659	9.18225	0.00244373	1
API5	0.830247	0.781022	4.33271	0.0373867	1
APIP	0.816872	0.742092	9.44589	0.00211622	1
APITD1	0.746914	0.659367	10.5725	0.00114784	1
APITD1-CORT	0.746914	0.659367	10.5725	0.00114784	1
APLF	0.90535	0.863747	4.80546	0.0283697	1
APLN	0.74177	0.695864	2.8475	0.0915164	1
APLNR	0.794239	0.77129	0.776912	0.378087	1
APLP1	0.856996	0.817518	3.14673	0.0760792	1
APLP2	0.610082	0.549878	4.08957	0.0431485	1
APMAP	0.726337	0.695864	1.17679	0.278011	1
APOA1	0.591564	0.53528	3.51741	0.0607271	1
APOA1-AS	0.591564	0.53528	3.51741	0.0607271	1
APOA1BP	0.4393	0.413625	0.675045	0.411298	1
APOA2	0.420782	0.403893	0.273234	0.601171	1
APOA4	0.591564	0.53528	3.51741	0.0607271	1
APOA5	0.590535	0.53528	3.38451	0.0658119	1
APOB	0.87037	0.839416	2.06337	0.150876	1
APOBEC1	0.788066	0.705596	10.43	0.00123987	1
APOBEC2	0.808642	0.812652	0.00974317	0.921371	1
APOBEC3A	0.657407	0.605839	3.12188	0.0772475	1
APOBEC3B-AS1	0.656379	0.600973	3.61154	0.05738	1
APOBEC3C	0.658436	0.605839	3.25502	0.0712049	1
APOBEC3D	0.658436	0.605839	3.25502	0.0712049	1
APOBEC3F	0.657407	0.605839	3.12188	0.0772475	1
APOBEC3G	0.657407	0.605839	3.12188	0.0772475	1
APOBEC3H	0.657407	0.605839	3.12188	0.0772475	1
APOBEC4	0.420782	0.411192	0.073335	0.786541	1
APOBR	0.599794	0.6691	5.6008	0.0179523	1
APOC1	0.842593	0.805353	2.59986	0.106873	1
APOC1P1	0.842593	0.80292	2.95824	0.0854409	1
APOC2	0.842593	0.80292	2.95824	0.0854409	1
APOC3	0.591564	0.53528	3.51741	0.0607271	1
APOC4	0.842593	0.80292	2.95824	0.0854409	1
APOC4-APOC2	0.842593	0.80292	2.95824	0.0854409	1
APOE	0.842593	0.805353	2.59986	0.106873	1
APOF	0.86214	0.815085	4.6075	0.0318323	1
APOH	0.69856	0.593674	13.8468	0.000198335	1
APOL1	0.658436	0.59854	4.24488	0.0393689	1
APOL2	0.658436	0.59854	4.24488	0.0393689	1
APOL3	0.658436	0.605839	3.25502	0.0712049	1
APOL4	0.659465	0.603406	3.71317	0.0539847	1
APOL5	0.65535	0.603406	3.16069	0.0754314	1
APOL6	0.659465	0.600973	4.04958	0.0441824	1
APOLD1	0.790123	0.688564	15.7795	7.11678e-05	1
APOM	0.858025	0.836983	0.85316	0.35566	1
APOO	0.743827	0.688564	4.17459	0.0410345	1
APOOL	0.762346	0.698297	5.87942	0.0153189	1
APOOP5	0.399177	0.479319	7.27652	0.00698618	1
APOPT1	0.763374	0.703163	5.20657	0.0225017	1
APP	0.820988	0.756691	7.11739	0.00763397	1
APPBP2	0.677984	0.554745	18.5411	1.66281e-05	0.368711
APPL1	0.742798	0.6618	8.97797	0.00273254	1
APPL2	0.843621	0.79562	4.36972	0.0365829	1
APRT	0.381687	0.457421	6.56881	0.0103781	1
APTX	0.773663	0.652068	21.4386	3.65334e-06	0.0810092
AQP1	0.805556	0.751825	4.7013	0.0301398	1
AQP10	0.432099	0.418491	0.166417	0.683316	1
AQP11	0.696502	0.652068	2.43411	0.118721	1
AQP12A	0.84465	0.798054	4.13641	0.04197	1
AQP12B	0.84465	0.798054	4.13641	0.04197	1
AQP2	0.849794	0.805353	3.85441	0.0496154	1
AQP3	0.774691	0.659367	19.3927	1.06411e-05	0.235956
AQP4	0.783951	0.676399	17.3438	3.11919e-05	0.691648
AQP4-AS1	0.780864	0.6691	18.5368	1.66658e-05	0.369547
AQP5	0.849794	0.805353	3.85441	0.0496154	1
AQP6	0.849794	0.807786	3.44003	0.0636346	1
AQP7	0.77572	0.656934	20.5928	5.68097e-06	0.12597
AQP7P1	0.799383	0.734793	6.65525	0.00988641	1
AQP7P3	0.779835	0.690998	11.7981	0.000592904	1
AQP8	0.591564	0.652068	4.19247	0.0406038	1
AQP9	0.815844	0.749392	7.4539	0.00632992	1
AQR	0.779835	0.710462	7.22989	0.00716997	1
AR	0.762346	0.717762	2.82232	0.0929617	1
ARAF	0.770576	0.705596	6.18393	0.0128916	1
ARAP1	0.751029	0.690998	5.01889	0.0250723	1
ARAP2	0.817901	0.727494	13.7414	0.000209779	1
ARAP3	0.783951	0.690998	13.0427	0.000304462	1
ARCN1	0.595679	0.53528	4.07546	0.0435103	1
AREG	0.865226	0.815085	5.31896	0.0210946	1
AREL1	0.757202	0.693431	5.75361	0.0164548	1
ARF1	0.406379	0.360097	2.4041	0.121018	1
ARF3	0.849794	0.815085	2.33129	0.126796	1
ARF4	0.737654	0.652068	9.90995	0.00164388	1
ARF5	0.783951	0.754258	1.2957	0.255	1
ARF6	0.778807	0.734793	2.87879	0.0897536	1
ARFGAP1	0.682099	0.608273	6.6923	0.009683	1
ARFGAP2	0.822016	0.776156	3.63167	0.0566899	1
ARFGAP3	0.645062	0.591241	3.35893	0.0668415	1
ARFGEF1	0.622428	0.557178	4.86861	0.0273495	1
ARFGEF2	0.74177	0.686131	4.2125	0.0401273	1
ARFIP1	0.831276	0.781022	4.53624	0.0331845	1
ARFIP2	0.794239	0.703163	12.9091	0.000326984	1
ARFRP1	0.682099	0.605839	7.14427	0.00752037	1
ARG1	0.70679	0.666667	2.00811	0.15646	1
ARG2	0.760288	0.686131	7.84119	0.00510691	1
ARGFX	0.860082	0.832117	1.57463	0.209536	1
ARGFXP2	0.6893	0.588808	12.5456	0.00039714	1
ARGLU1	0.677984	0.593674	8.69234	0.00319551	1
ARHGAP1	0.829218	0.776156	5.01562	0.0251196	1
ARHGAP10	0.840535	0.783455	6.09028	0.0135928	1
ARHGAP11A	0.781893	0.703163	9.3493	0.00223071	1
ARHGAP11B	0.776749	0.715328	5.6183	0.0177739	1
ARHGAP12	0.845679	0.807786	2.734	0.0982331	1
ARHGAP15	0.882716	0.829684	6.59101	0.0102495	1
ARHGAP17	0.593621	0.652068	3.9093	0.0480196	1
ARHGAP18	0.715021	0.671533	2.40806	0.120712	1
ARHGAP19	0.817901	0.776156	2.95209	0.0857668	1
ARHGAP19-SLIT1	0.815844	0.768856	3.72396	0.0536371	1
ARHGAP20	0.589506	0.542579	2.41536	0.12015	1
ARHGAP21	0.846708	0.798054	4.55559	0.0328114	1
ARHGAP22	0.843621	0.778589	7.99188	0.00469875	1
ARHGAP23	0.677984	0.537713	23.9568	9.85238e-07	0.0218467
ARHGAP24	0.847737	0.781022	8.56166	0.00343317	1
ARHGAP25	0.901235	0.861314	4.28181	0.0385223	1
ARHGAP26	0.790123	0.688564	15.7795	7.11678e-05	1
ARHGAP26-AS1	0.79321	0.688564	16.8751	3.99218e-05	0.885225
ARHGAP26-IT1	0.79321	0.690998	16.1204	5.94413e-05	1
ARHGAP27	0.702675	0.552311	28.3567	1.00898e-07	0.00223731
ARHGAP28	0.780864	0.695864	10.846	0.000990099	1
ARHGAP29	0.76749	0.734793	1.50898	0.219295	1
ARHGAP30	0.419753	0.403893	0.237522	0.626001	1
ARHGAP31	0.865226	0.839416	1.3711	0.241623	1
ARHGAP31-AS1	0.869342	0.839416	1.9123	0.166708	1
ARHGAP32	0.609053	0.559611	2.72739	0.0986401	1
ARHGAP33	0.858025	0.817518	3.33334	0.0678889	1
ARHGAP35	0.849794	0.793187	6.25216	0.0124042	1
ARHGAP36	0.74177	0.698297	2.54671	0.110524	1
ARHGAP39	0.54321	0.472019	5.5854	0.0181108	1
ARHGAP4	0.74177	0.710462	1.28946	0.256148	1
ARHGAP40	0.771605	0.717762	4.24796	0.0392976	1
ARHGAP42	0.576132	0.532847	2.0276	0.154464	1
ARHGAP44	0.539095	0.389294	25.3354	4.81796e-07	0.0106833
ARHGAP5	0.819959	0.76399	5.37835	0.0203882	1
ARHGAP5-AS1	0.819959	0.76399	5.37835	0.0203882	1
ARHGAP6	0.766461	0.70073	6.25925	0.0123547	1
ARHGAP8	0.656379	0.600973	3.61154	0.05738	1
ARHGAP9	0.87037	0.819951	5.53555	0.0186339	1
ARHGDIA	0.703704	0.615572	9.86945	0.00168045	1
ARHGDIB	0.808642	0.710462	15.6316	7.69558e-05	1
ARHGDIG	0.546296	0.600973	3.2905	0.0696819	1
ARHGEF1	0.856996	0.807786	4.90402	0.0267943	1
ARHGEF10	0.520576	0.440389	7.11239	0.00765531	1
ARHGEF10L	0.759259	0.664234	12.7865	0.000349137	1
ARHGEF11	0.435185	0.411192	0.584738	0.444461	1
ARHGEF12	0.596708	0.545012	2.96294	0.0851931	1
ARHGEF15	0.520576	0.394161	17.9835	2.22832e-05	0.494108
ARHGEF16	0.764403	0.70073	5.84124	0.0156548	1
ARHGEF17	0.734568	0.678832	4.16085	0.0413687	1
ARHGEF18	0.797325	0.722628	8.8231	0.00297441	1
ARHGEF19	0.761317	0.6691	12.111	0.000501247	1
ARHGEF2	0.441358	0.411192	0.951616	0.329308	1
ARHGEF25	0.868313	0.819951	5.0358	0.0248286	1
ARHGEF26	0.842593	0.785888	6.06673	0.0137751	1
ARHGEF26-AS1	0.843621	0.785888	6.31663	0.0119611	1
ARHGEF28	0.772634	0.664234	17.1007	3.54491e-05	0.786048
ARHGEF3	0.742798	0.656934	10.0827	0.0014967	1
ARHGEF3-AS1	0.748971	0.673966	7.80865	0.00519968	1
ARHGEF33	0.87963	0.829684	5.74277	0.0165566	1
ARHGEF37	0.794239	0.695864	15.0076	0.00010708	1
ARHGEF38	0.838477	0.783455	5.60983	0.01786	1
ARHGEF38-IT1	0.839506	0.788321	4.87779	0.0272044	1
ARHGEF39	0.772634	0.673966	14.2261	0.000162104	1
ARHGEF4	0.890947	0.844282	5.4095	0.0200274	1
ARHGEF40	0.811728	0.754258	5.49973	0.0190195	1
ARHGEF5	0.778807	0.749392	1.25028	0.263498	1
ARHGEF6	0.744856	0.703163	2.35404	0.124959	1
ARHGEF7	0.669753	0.581509	9.42459	0.00214095	1
ARHGEF7-AS1	0.671811	0.583942	9.36858	0.00220736	1
ARHGEF7-AS2	0.671811	0.583942	9.36858	0.00220736	1
ARHGEF9	0.757202	0.717762	2.16482	0.141201	1
ARHGEF9-IT1	0.759259	0.715328	2.71622	0.0993329	1
ARID1A	0.740741	0.632603	15.8392	6.89573e-05	1
ARID1B	0.708848	0.683698	0.756356	0.384471	1
ARID2	0.875514	0.812652	8.79985	0.00301255	1
ARID3A	0.760288	0.659367	14.4289	0.000145551	1
ARID3B	0.809671	0.742092	7.53862	0.00603904	1
ARID3C	0.766461	0.652068	18.71	1.52186e-05	0.337457
ARID4A	0.786008	0.751825	1.7493	0.185965	1
ARID4B	0.41358	0.374696	1.65862	0.197789	1
ARID5A	0.921811	0.888078	3.67796	0.0551364	1
ARID5B	0.846708	0.781022	8.26523	0.00404115	1
ARIH1	0.813786	0.751825	6.43844	0.0111677	1
ARIH2	0.748971	0.676399	7.31077	0.00685426	1
ARIH2OS	0.748971	0.676399	7.31077	0.00685426	1
ARL1	0.835391	0.798054	2.52858	0.111801	1
ARL10	0.792181	0.727494	6.52379	0.0106441	1
ARL11	0.640947	0.564477	6.8363	0.00893238	1
ARL13A	0.761317	0.686131	8.07996	0.00447573	1
ARL13B	0.869342	0.851582	0.631863	0.426673	1
ARL14	0.837449	0.781022	5.87204	0.0153832	1
ARL14EP	0.81893	0.761557	5.62927	0.017663	1
ARL14EPL	0.780864	0.683698	14.1064	0.00017275	1
ARL15	0.795267	0.708029	11.9016	0.000560862	1
ARL16	0.702675	0.610706	10.728	0.00105526	1
ARL2	0.805556	0.77129	1.87869	0.170483	1
ARL2BP	0.404321	0.479319	6.33898	0.0118113	1
ARL3	0.806584	0.761557	3.30109	0.0692338	1
ARL4A	0.790123	0.761557	1.21874	0.269608	1
ARL4C	0.849794	0.827251	0.945863	0.330775	1
ARL4D	0.705761	0.545012	32.458	1.21798e-08	0.000270075
ARL5A	0.897119	0.832117	10.7806	0.0010257	1
ARL5B	0.850823	0.800487	4.97413	0.0257292	1
ARL5C	0.668724	0.513382	29.007	7.21164e-08	0.00159911
ARL6	0.877572	0.841849	2.89364	0.0889297	1
ARL6IP1	0.591564	0.673966	7.94755	0.00481525	1
ARL6IP4	0.783951	0.734793	3.66134	0.0556889	1
ARL6IP5	0.776749	0.705596	7.5386	0.00603911	1
ARL6IP6	0.901235	0.841849	9.33467	0.00224858	1
ARL8A	0.402263	0.374696	0.807531	0.368851	1
ARL8B	0.812757	0.778589	1.91839	0.166034	1
ARL9	0.860082	0.798054	7.88019	0.00499793	1
ARMC1	0.623457	0.559611	4.66156	0.0308451	1
ARMC10	0.790123	0.754258	1.95795	0.161733	1
ARMC12	0.849794	0.839416	0.166415	0.683318	1
ARMC2	0.695473	0.656934	1.81068	0.178427	1
ARMC2-AS1	0.695473	0.6618	1.36695	0.242337	1
ARMC3	0.84465	0.800487	3.71259	0.0540036	1
ARMC4	0.837449	0.785888	4.90465	0.0267844	1
ARMC5	0.609053	0.659367	2.90592	0.0882548	1
ARMC6	0.851852	0.77129	12.5993	0.000385894	1
ARMC7	0.705761	0.652068	3.64502	0.056237	1
ARMC8	0.845679	0.817518	1.48125	0.22358	1
ARMC9	0.838477	0.807786	1.71186	0.190744	1
ARMCX2	0.762346	0.693431	6.80844	0.00907282	1
ARMCX3	0.760288	0.693431	6.37457	0.0115767	1
ARMCX4	0.757202	0.688564	6.66788	0.0098166	1
ARMCX5	0.762346	0.688564	7.80202	0.00521879	1
ARMCX6	0.760288	0.693431	6.37457	0.0115767	1
ARMS2	0.816872	0.77129	3.51581	0.0607861	1
ARNT	0.445473	0.442822	0.000989903	0.974901	1
ARNT2	0.8107	0.759124	4.40947	0.0357399	1
ARNTL	0.809671	0.725061	11.7374	0.000612553	1
ARNTL2	0.831276	0.746959	12.6106	0.000383571	1
ARPC1A	0.788066	0.744526	2.89682	0.0887544	1
ARPC1B	0.788066	0.744526	2.89682	0.0887544	1
ARPC2	0.868313	0.841849	1.47153	0.225105	1
ARPC3	0.823045	0.798054	1.03927	0.30799	1
ARPC4	0.816872	0.77129	3.51581	0.0607861	1
ARPC4-TTLL3	0.814815	0.768856	3.54684	0.0596591	1
ARPC5	0.419753	0.411192	0.055418	0.81389	1
ARPC5L	0.788066	0.754258	1.72094	0.189572	1
ARPP19	0.798354	0.725061	8.52578	0.00350151	1
ARPP21	0.80144	0.746959	4.76652	0.0290185	1
ARR3	0.763374	0.720195	2.65057	0.103513	1
ARRB1	0.725309	0.666667	4.52438	0.0334152	1
ARRB2	0.534979	0.418491	15.2161	9.58806e-05	1
ARRDC1	0.797325	0.742092	4.8328	0.0279232	1
ARRDC2	0.851852	0.785888	8.53652	0.0034809	1
ARRDC3	0.781893	0.673966	17.3657	3.08338e-05	0.683708
ARRDC4	0.807613	0.749392	5.56241	0.0183502	1
ARRDC5	0.808642	0.715328	14.1609	0.000167826	1
ARSA	0.654321	0.622871	1.11417	0.291177	1
ARSB	0.771605	0.654501	19.8272	8.47678e-06	0.187964
ARSD	0.718107	0.639903	7.96737	0.00476281	1
ARSE	0.720165	0.642336	7.92108	0.00488621	1
ARSF	0.719136	0.644769	7.21677	0.00722255	1
ARSG	0.691358	0.605839	9.11567	0.00253429	1
ARSH	0.721193	0.647202	7.17154	0.0074069	1
ARSI	0.794239	0.688564	17.2503	3.27646e-05	0.726522
ARSJ	0.837449	0.781022	5.87204	0.0153832	1
ARSK	0.787037	0.686131	15.4471	8.48484e-05	1
ART1	0.780864	0.690998	12.1024	0.000503577	1
ART3	0.86214	0.810219	5.60624	0.0178966	1
ART4	0.804527	0.708029	14.9169	0.00011235	1
ART5	0.780864	0.690998	12.1024	0.000503577	1
ARTN	0.797325	0.708029	12.5364	0.00039909	1
ARV1	0.407407	0.355231	3.08444	0.0790444	1
ARVCF	0.69856	0.647202	3.28743	0.0698122	1
ARX	0.771605	0.710462	5.48848	0.0191422	1
AS3MT	0.807613	0.761557	3.46882	0.062536	1
ASAH1	0.546296	0.418491	18.3703	1.81871e-05	0.403281
ASAH2	0.847737	0.778589	9.18425	0.00244107	1
ASAH2B	0.847737	0.776156	9.82664	0.00172002	1
ASAP1	0.556584	0.459854	10.4601	0.00121981	1
ASAP2	0.876543	0.822384	6.61226	0.0101279	1
ASAP3	0.751029	0.671533	8.80967	0.00299639	1
ASB1	0.845679	0.798054	4.34309	0.0371595	1
ASB10	0.771605	0.759124	0.187288	0.665184	1
ASB11	0.776749	0.703163	8.06017	0.0045249	1
ASB12	0.752058	0.722628	1.16154	0.281146	1
ASB13	0.819959	0.749392	8.5223	0.00350822	1
ASB14	0.743827	0.6618	9.227	0.00238473	1
ASB15	0.792181	0.749392	2.8328	0.0923573	1
ASB16	0.710905	0.542579	35.7715	2.21873e-09	4.91981e-05
ASB16-AS1	0.710905	0.542579	35.7715	2.21873e-09	4.91981e-05
ASB17	0.802469	0.73236	7.91283	0.00490856	1
ASB18	0.846708	0.812652	2.2078	0.137314	1
ASB2	0.763374	0.695864	6.55079	0.0104838	1
ASB4	0.798354	0.754258	3.07439	0.0795342	1
ASB5	0.813786	0.761557	4.57408	0.0324593	1
ASB6	0.799383	0.756691	2.88812	0.0892349	1
ASB7	0.806584	0.744526	6.29611	0.0121003	1
ASB8	0.867284	0.817518	5.30026	0.0213222	1
ASB9	0.776749	0.703163	8.06017	0.0045249	1
ASB9P1	0.797325	0.746959	4.01276	0.0451571	1
ASCC1	0.80144	0.751825	3.94703	0.0469542	1
ASCC2	0.665638	0.618005	2.68054	0.101581	1
ASCC3	0.696502	0.649635	2.71607	0.0993422	1
ASCL1	0.846708	0.79562	5.02301	0.0250127	1
ASCL2	0.772634	0.695864	8.67062	0.00323381	1
ASCL3	0.791152	0.708029	10.6902	0.00107703	1
ASCL4	0.849794	0.80292	4.2908	0.0383191	1
ASCL5	0.40535	0.381995	0.563528	0.452842	1
ASF1A	0.715021	0.639903	7.30825	0.00686387	1
ASF1B	0.828189	0.754258	9.6383	0.00190562	1
ASGR1	0.524691	0.399027	17.7583	2.50814e-05	0.556156
ASGR2	0.524691	0.399027	17.7583	2.50814e-05	0.556156
ASH1L	0.438272	0.411192	0.757163	0.384218	1
ASH1L-AS1	0.4393	0.416058	0.544607	0.46053	1
ASH2L	0.57716	0.469586	13.0507	0.00030317	1
ASIC1	0.846708	0.805353	3.28252	0.0700214	1
ASIC2	0.626543	0.510949	15.5073	8.21887e-05	1
ASIC3	0.771605	0.756691	0.281052	0.596012	1
ASIC4	0.866255	0.832117	2.46271	0.116577	1
ASIC5	0.831276	0.776156	5.45847	0.0194737	1
ASIP	0.795267	0.751825	2.95157	0.0857943	1
ASL	0.814815	0.754258	6.1742	0.0129627	1
ASNA1	0.826132	0.754258	9.04561	0.00263326	1
ASNS	0.788066	0.746959	2.57536	0.108539	1
ASNSD1	0.888889	0.839416	5.98624	0.0144179	1
ASPA	0.538066	0.425791	14.1207	0.000171448	1
ASPDH	0.839506	0.800487	2.81903	0.0931525	1
ASPG	0.751029	0.695864	4.23066	0.0397001	1
ASPH	0.628601	0.56691	4.36637	0.0366549	1
ASPHD1	0.600823	0.659367	3.95032	0.0468626	1
ASPHD2	0.680041	0.63747	2.17048	0.140683	1
ASPM	0.40535	0.384428	0.443576	0.505401	1
ASPN	0.808642	0.725061	11.4201	0.000726544	1
ASPRV1	0.90535	0.871046	3.26548	0.0707523	1
ASPSCR1	0.702675	0.615572	9.62453	0.00191996	1
ASRGL1	0.813786	0.766423	3.75516	0.0526447	1
ASS1	0.80144	0.746959	4.76652	0.0290185	1
ASTE1	0.850823	0.824818	1.28669	0.256658	1
ASTL	0.923868	0.892944	3.15446	0.0757198	1
ASTN1	0.40535	0.391727	0.170008	0.680105	1
ASTN2	0.791152	0.739659	4.11305	0.0425536	1
ASUN	0.82716	0.749392	10.6002	0.00113073	1
ASXL1	0.803498	0.756691	3.53269	0.0601702	1
ASXL2	0.835391	0.815085	0.704215	0.401371	1
ASXL3	0.780864	0.686131	13.4226	0.000248611	1
ASZ1	0.789095	0.76399	0.924576	0.336276	1
ATAD1	0.803498	0.749392	4.73377	0.0295759	1
ATAD2	0.563786	0.445255	15.8142	6.98752e-05	1
ATAD2B	0.835391	0.817518	0.533607	0.465094	1
ATAD3A	0.770576	0.705596	6.18393	0.0128916	1
ATAD3B	0.770576	0.705596	6.18393	0.0128916	1
ATAD3C	0.770576	0.705596	6.18393	0.0128916	1
ATAD5	0.691358	0.593674	11.8915	0.000563912	1
ATAT1	0.854938	0.824818	1.78686	0.18131	1
ATCAY	0.796296	0.695864	15.7206	7.34186e-05	1
ATE1	0.814815	0.768856	3.54684	0.0596591	1
ATE1-AS1	0.814815	0.77129	3.17602	0.0747267	1
ATF1	0.835391	0.800487	2.20196	0.137836	1
ATF2	0.893004	0.849148	4.85295	0.0275988	1
ATF3	0.40535	0.396594	0.0592665	0.807659	1
ATF4	0.654321	0.59854	3.6527	0.0559785	1
ATF5	0.835391	0.788321	4.04758	0.0442347	1
ATF6	0.40535	0.391727	0.170008	0.680105	1
ATF6B	0.860082	0.83455	1.30135	0.253967	1
ATF7	0.868313	0.815085	6.09178	0.0135812	1
ATF7IP	0.802469	0.703163	15.6712	7.5364e-05	1
ATF7IP2	0.569959	0.647202	6.82404	0.00899388	1
ATG10	0.782922	0.6691	19.31	1.1112e-05	0.246398
ATG12	0.780864	0.681265	14.806	0.000119155	1
ATG13	0.831276	0.776156	5.45847	0.0194737	1
ATG14	0.782922	0.737226	3.14633	0.0760981	1
ATG16L1	0.842593	0.812652	1.65793	0.197883	1
ATG16L2	0.752058	0.695864	4.40281	0.0358797	1
ATG2A	0.803498	0.76399	2.50019	0.113833	1
ATG2B	0.765432	0.683698	9.63683	0.00190714	1
ATG3	0.867284	0.844282	1.08841	0.296824	1
ATG4A	0.75	0.686131	5.67213	0.0172365	1
ATG4B	0.847737	0.80292	3.88115	0.048831	1
ATG4C	0.795267	0.710462	11.2587	0.000792527	1
ATG4D	0.814815	0.754258	6.1742	0.0129627	1
ATG5	0.686214	0.642336	2.33228	0.126716	1
ATG7	0.824074	0.77129	4.86066	0.0274758	1
ATG9A	0.868313	0.839416	1.76762	0.183676	1
ATG9B	0.771605	0.756691	0.281052	0.596012	1
ATHL1	0.777778	0.678832	14.4969	0.000140392	1
ATIC	0.871399	0.839416	2.22092	0.136152	1
ATL1	0.776749	0.734793	2.59434	0.107246	1
ATL2	0.880658	0.827251	6.59705	0.0102148	1
ATL3	0.800412	0.778589	0.712721	0.398542	1
ATM	0.585391	0.542579	1.99204	0.158128	1
ATMIN	0.375514	0.450122	6.40465	0.0113822	1
ATN1	0.806584	0.722628	11.4423	0.000717917	1
ATOH1	0.849794	0.793187	6.25216	0.0124042	1
ATOH7	0.796296	0.727494	7.47212	0.00626616	1
ATOH8	0.914609	0.861314	8.44167	0.0036672	1
ATOX1	0.796296	0.705596	12.8848	0.000331261	1
ATP10A	0.786008	0.727494	5.23708	0.0221103	1
ATP10B	0.787037	0.693431	13.3381	0.000260061	1
ATP10D	0.851852	0.79562	6.23181	0.0125476	1
ATP11A	0.670782	0.576642	10.743	0.00104673	1
ATP11A-AS1	0.670782	0.579075	10.1939	0.00140903	1
ATP11B	0.820988	0.768856	4.68337	0.030456	1
ATP11C	0.742798	0.698297	2.67829	0.101725	1
ATP12A	0.703704	0.652068	3.3535	0.0670625	1
ATP13A1	0.845679	0.77129	10.4952	0.00119686	1
ATP13A2	0.759259	0.664234	12.7865	0.000349137	1
ATP13A3	0.814815	0.776156	2.49323	0.114337	1
ATP13A4	0.814815	0.749392	7.19984	0.00729101	1
ATP13A4-AS1	0.817901	0.754258	6.89411	0.00864802	1
ATP13A5	0.816872	0.756691	6.14468	0.0131808	1
ATP13A5-AS1	0.816872	0.756691	6.14468	0.0131808	1
ATP1A1	0.825103	0.754258	8.75767	0.00308303	1
ATP1A2	0.421811	0.394161	0.800121	0.371057	1
ATP1A3	0.856996	0.807786	4.90402	0.0267943	1
ATP1A4	0.418724	0.394161	0.621885	0.430348	1
ATP1B1	0.427984	0.420925	0.0335371	0.854695	1
ATP1B2	0.520576	0.389294	19.4186	1.04982e-05	0.232787
ATP1B3	0.811728	0.783455	1.28804	0.256409	1
ATP1B4	0.75	0.693431	4.44054	0.0350952	1
ATP2A1	0.602881	0.666667	4.73025	0.0296365	1
ATP2A2	0.823045	0.798054	1.03927	0.30799	1
ATP2A3	0.534979	0.43309	11.592	0.000662351	1
ATP2B1	0.845679	0.788321	6.29458	0.0121108	1
ATP2B2	0.804527	0.749392	4.93384	0.0263358	1
ATP2B2-IT2	0.809671	0.751825	5.5309	0.0186835	1
ATP2B3	0.740741	0.708029	1.40999	0.235058	1
ATP2B4	0.388889	0.372263	0.270949	0.602696	1
ATP2C1	0.850823	0.824818	1.28669	0.256658	1
ATP2C2	0.37963	0.452555	6.09391	0.0135649	1
ATP4A	0.865226	0.822384	3.88241	0.0487944	1
ATP4B	0.667695	0.576642	10.0106	0.00155644	1
ATP5A1	0.763374	0.671533	12.0738	0.000511367	1
ATP5B	0.865226	0.815085	5.31896	0.0210946	1
ATP5C1	0.82716	0.76399	7.03939	0.00797364	1
ATP5D	0.764403	0.671533	12.3728	0.000435634	1
ATP5E	0.685185	0.63017	3.70267	0.0543254	1
ATP5EP2	0.702675	0.639903	4.97972	0.0256461	1
ATP5F1	0.802469	0.744526	5.41268	0.0199911	1
ATP5G1	0.710905	0.574209	23.8083	1.06421e-06	0.0235977
ATP5G2	0.867284	0.815085	5.82721	0.0157801	1
ATP5G3	0.893004	0.849148	4.85295	0.0275988	1
ATP5H	0.705761	0.649635	3.98926	0.0457912	1
ATP5I	0.815844	0.717762	15.9806	6.39952e-05	1
ATP5J	0.82716	0.76399	7.03939	0.00797364	1
ATP5J2	0.789095	0.746959	2.71794	0.0992263	1
ATP5J2-PTCD1	0.789095	0.746959	2.71794	0.0992263	1
ATP5L	0.595679	0.53528	4.07546	0.0435103	1
ATP5L2	0.646091	0.588808	3.82023	0.0506372	1
ATP5O	0.848765	0.785888	7.65707	0.00565504	1
ATP5S	0.773663	0.729927	2.7995	0.0942938	1
ATP5SL	0.86214	0.810219	5.60624	0.0178966	1
ATP6AP1	0.742798	0.708029	1.60899	0.204634	1
ATP6AP1L	0.783951	0.671533	18.9019	1.37615e-05	0.305147
ATP6AP2	0.76749	0.698297	6.95472	0.00835986	1
ATP6V0A1	0.694444	0.540146	29.5002	5.59095e-08	0.00123974
ATP6V0A2	0.789095	0.73236	4.96856	0.0258121	1
ATP6V0A4	0.760288	0.744526	0.307971	0.578928	1
ATP6V0B	0.799383	0.712895	11.8508	0.000576371	1
ATP6V0C	0.569959	0.63017	4.07744	0.0434595	1
ATP6V0CP3	0.817901	0.80292	0.334216	0.563187	1
ATP6V0D1	0.381687	0.447689	4.96625	0.0258466	1
ATP6V0D2	0.570988	0.513382	3.64961	0.0560822	1
ATP6V0E1	0.787037	0.729927	5.00317	0.025301	1
ATP6V0E2	0.777778	0.759124	0.470316	0.492842	1
ATP6V0E2-AS1	0.777778	0.759124	0.470316	0.492842	1
ATP6V1A	0.866255	0.844282	0.981413	0.32185	1
ATP6V1B1	0.910494	0.878345	2.99458	0.0835438	1
ATP6V1B2	0.538066	0.418491	16.046	6.18211e-05	1
ATP6V1C1	0.566872	0.493917	5.90967	0.015058	1
ATP6V1C2	0.873457	0.827251	4.73787	0.0295056	1
ATP6V1D	0.75823	0.688564	6.8867	0.00868396	1
ATP6V1E1	0.66358	0.613139	3.00711	0.0829002	1
ATP6V1E2	0.884774	0.829684	7.19667	0.00730391	1
ATP6V1F	0.76749	0.749392	0.426809	0.513559	1
ATP6V1G1	0.807613	0.744526	6.52899	0.010613	1
ATP6V1G2	0.858025	0.839416	0.654353	0.418561	1
ATP6V1G2-DDX39B	0.858025	0.836983	0.85316	0.35566	1
ATP6V1G3	0.40535	0.379562	0.697908	0.403487	1
ATP6V1H	0.63786	0.586375	3.04313	0.0810795	1
ATP7A	0.759259	0.710462	3.36615	0.0665491	1
ATP7B	0.662551	0.583942	7.40273	0.00651251	1
ATP8A1	0.839506	0.746959	15.6066	7.79831e-05	1
ATP8A2	0.700617	0.622871	7.63937	0.00571078	1
ATP8B1	0.757202	0.649635	16.2371	5.58874e-05	1
ATP8B2	0.43107	0.418491	0.138893	0.709384	1
ATP8B3	0.76749	0.6691	13.9663	0.000186119	1
ATP8B4	0.771605	0.725061	3.16035	0.0754469	1
ATP8B5P	0.772634	0.6691	15.6328	7.69098e-05	1
ATP9A	0.709877	0.6618	2.93009	0.0869427	1
ATP9B	0.746914	0.642336	15.0205	0.000106349	1
ATPAF1	0.802469	0.712895	12.8168	0.000343512	1
ATPAF2	0.570988	0.437956	19.9987	7.74968e-06	0.171841
ATPIF1	0.742798	0.639903	14.4235	0.000145973	1
ATR	0.815844	0.773723	2.98261	0.0841636	1
ATRAID	0.866255	0.846715	0.762954	0.382406	1
ATRIP	0.752058	0.678832	7.49628	0.00618265	1
ATRN	0.779835	0.734793	3.02708	0.0818854	1
ATRNL1	0.802469	0.766423	2.06294	0.150918	1
ATRX	0.756173	0.710462	2.92289	0.0873313	1
ATXN1	0.832305	0.776156	5.68806	0.0170808	1
ATXN10	0.65535	0.605839	2.86432	0.0905638	1
ATXN1L	0.38786	0.445255	3.71448	0.0539424	1
ATXN2	0.81893	0.788321	1.56419	0.211053	1
ATXN2L	0.601852	0.666667	4.88475	0.0270949	1
ATXN3	0.754115	0.686131	6.49271	0.0108318	1
ATXN3L	0.771605	0.703163	6.8794	0.00871946	1
ATXN7	0.779835	0.70073	9.38349	0.00218948	1
ATXN7L1	0.786008	0.749392	2.01682	0.155565	1
ATXN7L2	0.791152	0.746959	3.01574	0.0824596	1
ATXN7L3	0.709877	0.542579	35.2945	2.83436e-09	6.2849e-05
ATXN7L3B	0.850823	0.798054	5.46525	0.0193982	1
ATXN8OS	0.66358	0.605839	3.96473	0.0464631	1
AUH	0.813786	0.729927	11.6978	0.000625727	1
AUNIP	0.75823	0.6691	11.2408	0.000800198	1
AUP1	0.91358	0.863747	7.34621	0.00672042	1
AURKA	0.728395	0.681265	2.91788	0.087603	1
AURKAIP1	0.770576	0.708029	5.72847	0.0166921	1
AURKAPS1	0.396091	0.377129	0.360339	0.548318	1
AURKB	0.522634	0.394161	18.5784	1.63057e-05	0.361563
AURKC	0.81893	0.773723	3.48499	0.0619278	1
AUTS2	0.791152	0.722628	7.29429	0.0069174	1
AVEN	0.778807	0.698297	9.68833	0.00185442	1
AVIL	0.867284	0.810219	6.94924	0.0083855	1
AVL9	0.80144	0.77129	1.41867	0.233623	1
AVP	0.776749	0.737226	2.29485	0.129803	1
AVPI1	0.81893	0.781022	2.43369	0.118753	1
AVPR1A	0.855967	0.817518	2.96623	0.08502	1
AVPR1B	0.388889	0.357664	1.06695	0.301636	1
AVPR2	0.742798	0.710462	1.3831	0.239574	1
AWAT1	0.762346	0.720195	2.51576	0.112713	1
AWAT2	0.764403	0.722628	2.48365	0.115035	1
AXDND1	0.43107	0.425791	0.0148421	0.903035	1
AXIN1	0.545267	0.59854	3.116	0.0775269	1
AXIN2	0.693416	0.581509	15.6292	7.70551e-05	1
AXL	0.863169	0.810219	5.8611	0.0154791	1
AZGP1	0.788066	0.754258	1.72094	0.189572	1
AZGP1P1	0.788066	0.754258	1.72094	0.189572	1
AZI2	0.81893	0.776156	3.11463	0.077592	1
AZIN1	0.567901	0.49635	5.68198	0.01714	1
AZU1	0.762346	0.6618	14.3932	0.000148335	1
B2M	0.760288	0.664234	13.0923	0.000296512	1
B3GALNT1	0.838477	0.781022	6.11431	0.0134092	1
B3GALNT2	0.41358	0.379562	1.25114	0.263336	1
B3GALT1	0.895062	0.851582	4.84262	0.0277646	1
B3GALT2	0.410494	0.386861	0.575695	0.448005	1
B3GALT4	0.848765	0.822384	1.31209	0.252017	1
B3GALT5	0.838477	0.788321	4.66187	0.0308395	1
B3GALT6	0.771605	0.708029	5.93553	0.0148386	1
B3GAT1	0.603909	0.542579	4.22839	0.0397531	1
B3GAT2	0.760288	0.693431	6.37457	0.0115767	1
B3GAT3	0.807613	0.768856	2.43951	0.118313	1
B3GNT2	0.846708	0.805353	3.28252	0.0700214	1
B3GNT3	0.845679	0.788321	6.29458	0.0121108	1
B3GNT4	0.786008	0.739659	3.26939	0.0705838	1
B3GNT5	0.819959	0.773723	3.66221	0.0556597	1
B3GNT6	0.716049	0.666667	3.1316	0.0767883	1
B3GNT7	0.839506	0.812652	1.30144	0.25395	1
B3GNT8	0.863169	0.812652	5.33824	0.0208625	1
B3GNT9	0.384774	0.447689	4.4928	0.0340379	1
B3GNTL1	0.699588	0.608273	10.5249	0.00117774	1
B4GALNT1	0.868313	0.815085	6.09178	0.0135812	1
B4GALNT2	0.707819	0.574209	22.6566	1.93692e-06	0.0429492
B4GALNT3	0.779835	0.712895	6.73295	0.00946479	1
B4GALNT4	0.777778	0.676399	15.2027	9.6567e-05	1
B4GALT1	0.774691	0.652068	21.8471	2.95268e-06	0.0654727
B4GALT2	0.799383	0.712895	11.8508	0.000576371	1
B4GALT3	0.420782	0.403893	0.273234	0.601171	1
B4GALT4	0.867284	0.841849	1.34581	0.246011	1
B4GALT4-AS1	0.866255	0.839416	1.49711	0.221117	1
B4GALT5	0.75	0.686131	5.67213	0.0172365	1
B4GALT6	0.781893	0.671533	18.1357	2.05709e-05	0.456138
B4GALT7	0.794239	0.729927	6.49017	0.0108472	1
B9D1	0.574074	0.454988	16.0088	6.30489e-05	1
B9D2	0.86214	0.810219	5.60624	0.0178966	1
BAALC	0.566872	0.491484	6.31868	0.0119473	1
BAAT	0.79321	0.734793	5.33724	0.0208745	1
BABAM1	0.842593	0.773723	8.90399	0.00284548	1
BACE1	0.591564	0.537713	3.21208	0.0730963	1
BACE2	0.833333	0.805353	1.37871	0.24032	1
BACH1	0.825103	0.756691	8.17475	0.00424774	1
BACH1-IT2	0.832305	0.77129	6.71018	0.00958639	1
BACH2	0.691358	0.642336	2.95331	0.0857017	1
BAD	0.796296	0.761557	1.87091	0.171371	1
BAG1	0.772634	0.652068	21.0349	4.50986e-06	0.100002
BAG2	0.837449	0.827251	0.149882	0.698649	1
BAG3	0.817901	0.773723	3.31267	0.0687475	1
BAG4	0.580247	0.467153	14.4551	0.000143543	1
BAG5	0.764403	0.703163	5.40149	0.0201196	1
BAG6	0.858025	0.836983	0.85316	0.35566	1
BAGE2	0.81893	0.754258	7.14439	0.00751988	1
BAHD1	0.763374	0.664234	14.0353	0.000179406	1
BAIAP2	0.702675	0.600973	13.1067	0.000294235	1
BAIAP2-AS1	0.702675	0.600973	13.1067	0.000294235	1
BAIAP2L1	0.791152	0.742092	3.72923	0.0534679	1
BAIAP2L2	0.654321	0.593674	4.33259	0.0373894	1
BAIAP3	0.550412	0.600973	2.80308	0.0940832	1
BAK1	0.846708	0.819951	1.33762	0.247453	1
BAMBI	0.838477	0.80292	2.31989	0.127729	1
BANF1	0.794239	0.79562	2.35115e-29	1	1
BANF2	0.773663	0.737226	1.92307	0.165518	1
BANK1	0.843621	0.783455	6.85488	0.00883993	1
BANP	0.382716	0.457421	6.38378	0.0115168	1
BAP1	0.759259	0.681265	8.64806	0.0032741	1
BARD1	0.868313	0.836983	2.08943	0.148321	1
BARHL1	0.800412	0.739659	5.90953	0.0150592	1
BARHL2	0.786008	0.729927	4.80841	0.0283212	1
BARX2	0.61214	0.552311	4.044	0.0443287	1
BASP1	0.807613	0.720195	12.4261	0.000423385	1
BASP1P1	0.707819	0.627737	8.20435	0.00417901	1
BATF	0.755144	0.70073	4.15638	0.0414778	1
BATF2	0.805556	0.77129	1.87869	0.170483	1
BATF3	0.404321	0.396594	0.0432042	0.835341	1
BAX	0.838477	0.80292	2.31989	0.127729	1
BAZ1A	0.756173	0.703163	3.95196	0.0468167	1
BAZ1B	0.797325	0.744526	4.41373	0.0356508	1
BAZ2A	0.864198	0.815085	5.07511	0.0242718	1
BAZ2B	0.882716	0.83455	5.45018	0.0195663	1
BBC3	0.850823	0.800487	4.97413	0.0257292	1
BBIP1	0.81893	0.778589	2.76415	0.0963982	1
BBOX1	0.813786	0.766423	3.75516	0.0526447	1
BBS1	0.791152	0.768856	0.722663	0.395272	1
BBS10	0.848765	0.79562	5.48819	0.0191453	1
BBS12	0.840535	0.793187	4.19102	0.0406385	1
BBS2	0.40535	0.489051	7.91773	0.00489527	1
BBS4	0.813786	0.751825	6.43844	0.0111677	1
BBS5	0.841564	0.822384	0.641	0.423349	1
BBS7	0.839506	0.790754	4.42397	0.0354375	1
BBS9	0.800412	0.768856	1.55436	0.212493	1
BBX	0.872428	0.849148	1.15229	0.28307	1
BCAM	0.84465	0.800487	3.71259	0.0540036	1
BCAN	0.4393	0.416058	0.544607	0.46053	1
BCAP29	0.795267	0.766423	1.26544	0.260625	1
BCAP31	0.74177	0.712895	1.0879	0.296937	1
BCAR1	0.374486	0.445255	5.7587	0.0164072	1
BCAR3	0.760288	0.710462	3.52148	0.0605782	1
BCAR4	0.572016	0.656934	8.31007	0.00394258	1
BCAS1	0.711934	0.647202	5.3861	0.0202978	1
BCAS2	0.811728	0.751825	5.97476	0.0145121	1
BCAS3	0.673868	0.540146	21.6906	3.2036e-06	0.0710365
BCAS4	0.742798	0.673966	6.48482	0.01088	1
BCAT1	0.798354	0.734793	6.42402	0.0112587	1
BCAT2	0.837449	0.807786	1.58706	0.207747	1
BCCIP	0.819959	0.76399	5.37835	0.0203882	1
BCDIN3D	0.848765	0.810219	2.87409	0.0900157	1
BCDIN3D-AS1	0.848765	0.810219	2.87409	0.0900157	1
BCHE	0.831276	0.776156	5.45847	0.0194737	1
BCKDHA	0.86214	0.810219	5.60624	0.0178966	1
BCKDHB	0.731481	0.656934	7.42834	0.00642047	1
BCKDK	0.610082	0.659367	2.78629	0.0950743	1
BCL10	0.795267	0.720195	8.85375	0.00292488	1
BCL11A	0.891975	0.83455	8.18697	0.00421924	1
BCL11B	0.771605	0.698297	7.88904	0.00497352	1
BCL2	0.75823	0.63747	20.4054	6.26517e-06	0.138924
BCL2A1	0.808642	0.751825	5.3163	0.0211268	1
BCL2L1	0.79321	0.754258	2.34463	0.125715	1
BCL2L10	0.798354	0.727494	7.97429	0.00474463	1
BCL2L11	0.901235	0.875912	1.69237	0.193289	1
BCL2L12	0.834362	0.785888	4.27517	0.0386732	1
BCL2L13	0.662551	0.610706	3.17703	0.0746804	1
BCL2L14	0.79321	0.693431	15.3815	8.78445e-05	1
BCL2L15	0.807613	0.744526	6.52899	0.010613	1
BCL2L2	0.816872	0.759124	5.65902	0.0173658	1
BCL2L2-PABPN1	0.817901	0.759124	5.88474	0.0152727	1
BCL3	0.84465	0.800487	3.71259	0.0540036	1
BCL6	0.823045	0.773723	4.22381	0.0398604	1
BCL6B	0.524691	0.406326	15.725	7.32505e-05	1
BCL7A	0.783951	0.742092	2.6385	0.104302	1
BCL7B	0.797325	0.744526	4.41373	0.0356508	1
BCL7C	0.605967	0.656934	2.97561	0.0845282	1
BCL9	0.452675	0.459854	0.0345788	0.852481	1
BCL9L	0.595679	0.530414	4.77521	0.0288723	1
BCLAF1	0.711934	0.676399	1.57598	0.209341	1
BCO2	0.595679	0.545012	2.84081	0.091898	1
BCOR	0.77572	0.693431	10.0318	0.00153859	1
BCORL1	0.74177	0.695864	2.8475	0.0915164	1
BCR	0.6893	0.647202	2.15184	0.142399	1
BCRP2	0.700617	0.6618	1.85432	0.173281	1
BCRP3	0.690329	0.63747	3.44005	0.0636336	1
BCS1L	0.865226	0.836983	1.65518	0.198255	1
BCYRN1	0.878601	0.807786	11.2858	0.000781002	1
BDH1	0.795267	0.756691	2.31419	0.128198	1
BDH2	0.842593	0.788321	5.55982	0.0183773	1
BDKRB1	0.766461	0.686131	9.33553	0.00224753	1
BDKRB2	0.768519	0.686131	9.86704	0.00168266	1
BDNF	0.815844	0.76399	4.54294	0.0330547	1
BDNF-AS	0.815844	0.76399	4.54294	0.0330547	1
BDP1	0.738683	0.647202	11.3353	0.000760471	1
BEAN1	0.385802	0.447689	4.34047	0.0372166	1
BECN1	0.700617	0.540146	32.12	1.44935e-08	0.000321379
BEGAIN	0.773663	0.703163	7.33894	0.00674764	1
BEND2	0.778807	0.705596	8.02431	0.00461536	1
BEND3	0.670782	0.635036	1.48966	0.222269	1
BEND3P3	0.83642	0.768856	8.3499	0.00385708	1
BEND4	0.835391	0.751825	12.5981	0.000386149	1
BEND5	0.772634	0.708029	6.14674	0.0131655	1
BEND6	0.837449	0.824818	0.247533	0.618817	1
BEND7	0.816872	0.776156	2.79437	0.0945961	1
BEST1	0.812757	0.778589	1.91839	0.166034	1
BEST2	0.826132	0.756691	8.45269	0.00364503	1
BEST3	0.823045	0.788321	2.06591	0.150625	1
BEST4	0.796296	0.703163	13.5694	0.000229899	1
BET1	0.803498	0.756691	3.53269	0.0601702	1
BET1L	0.777778	0.678832	14.4969	0.000140392	1
BEX1	0.761317	0.688564	7.56713	0.00594424	1
BEX2	0.759259	0.686131	7.60646	0.00581596	1
BEX4	0.760288	0.686131	7.84119	0.00510691	1
BEX5	0.764403	0.690998	7.76323	0.00533205	1
BFAR	0.582305	0.673966	9.81573	0.00173026	1
BFSP1	0.774691	0.744526	1.30194	0.253859	1
BFSP2	0.845679	0.815085	1.76023	0.184596	1
BGLAP	0.441358	0.411192	0.951616	0.329308	1
BGN	0.740741	0.705596	1.63738	0.200686	1
BHLHA15	0.794239	0.744526	3.86876	0.0491929	1
BHLHA9	0.538066	0.440389	10.6399	0.00110673	1
BHLHB9	0.761317	0.688564	7.56713	0.00594424	1
BHLHE22	0.633745	0.569343	4.78978	0.0286292	1
BHLHE23	0.684156	0.603406	8.03944	0.00457697	1
BHLHE40	0.814815	0.781022	1.88996	0.169207	1
BHLHE40-AS1	0.813786	0.781022	1.76566	0.18392	1
BHLHE41	0.825103	0.751825	9.35905	0.00221888	1
BHMT	0.772634	0.654501	20.2181	6.90946e-06	0.15321
BHMT2	0.771605	0.654501	19.8272	8.47678e-06	0.187964
BICC1	0.842593	0.781022	7.14165	0.00753138	1
BICD1	0.782922	0.717762	6.43722	0.0111753	1
BICD2	0.804527	0.727494	9.59642	0.00194957	1
BID	0.67284	0.618005	3.61244	0.057349	1
BIK	0.650206	0.593674	3.73588	0.0532557	1
BIN1	0.893004	0.841849	6.57811	0.0103241	1
BIN2	0.830247	0.800487	1.54697	0.213584	1
BIN3	0.540123	0.418491	16.6119	4.58625e-05	1
BIRC2	0.595679	0.564477	1.03445	0.309116	1
BIRC3	0.597737	0.56691	1.00984	0.314942	1
BIRC5	0.703704	0.620438	8.80983	0.00299611	1
BIRC6	0.846708	0.812652	2.2078	0.137314	1
BIRC7	0.682099	0.608273	6.6923	0.009683	1
BIRC8	0.828189	0.798054	1.57378	0.209659	1
BIVM	0.680041	0.600973	7.6617	0.00564054	1
BIVM-ERCC5	0.680041	0.600973	7.6617	0.00564054	1
BLACE	0.748971	0.754258	0.0195065	0.888924	1
BLCAP	0.765432	0.717762	3.26235	0.0708875	1
BLID	0.598765	0.557178	1.89199	0.168977	1
BLK	0.539095	0.430657	13.1587	0.000286193	1
BLM	0.788066	0.725061	6.11155	0.0134301	1
BLMH	0.692387	0.596107	11.5704	0.000670114	1
BLNK	0.822016	0.783455	2.55176	0.110172	1
BLOC1S1	0.866255	0.815085	5.56963	0.0182746	1
BLOC1S2	0.804527	0.766423	2.32971	0.126925	1
BLOC1S3	0.847737	0.798054	4.774	0.0288927	1
BLOC1S4	0.814815	0.734793	10.7111	0.00106493	1
BLOC1S5	0.839506	0.778589	6.89762	0.00863107	1
BLOC1S5-TXNDC5	0.839506	0.776156	7.45279	0.0063338	1
BLOC1S6	0.76749	0.681265	10.7687	0.00103233	1
BLVRA	0.81893	0.773723	3.48499	0.0619278	1
BLVRB	0.855967	0.815085	3.35962	0.0668133	1
BLZF1	0.427984	0.416058	0.122881	0.72593	1
BMF	0.765432	0.671533	12.6761	0.000370353	1
BMI1	0.835391	0.798054	2.52858	0.111801	1
BMP1	0.542181	0.418491	17.1879	3.38591e-05	0.750792
BMP10	0.909465	0.863747	5.99166	0.0143736	1
BMP15	0.763374	0.717762	2.96516	0.0850761	1
BMP2	0.776749	0.705596	7.5386	0.00603911	1
BMP2K	0.865226	0.79562	10.136	0.00145399	1
BMP3	0.866255	0.798054	9.79546	0.00174943	1
BMP4	0.798354	0.734793	6.42402	0.0112587	1
BMP5	0.831276	0.815085	0.421101	0.516388	1
BMP6	0.838477	0.776156	7.1834	0.00735813	1
BMP7	0.691358	0.644769	2.66036	0.102878	1
BMP8A	0.795267	0.727494	7.22809	0.00717714	1
BMP8B	0.794239	0.722628	8.03764	0.00458151	1
BMPER	0.8107	0.766423	3.23817	0.071941	1
BMPR1A	0.811728	0.759124	4.60548	0.03187	1
BMPR1B	0.842593	0.785888	6.06673	0.0137751	1
BMPR2	0.820988	0.76399	5.59989	0.0179617	1
BMS1	0.871399	0.807786	8.7967	0.00301776	1
BMS1P20	0.692387	0.654501	1.73848	0.187332	1
BMS1P4	0.79321	0.749392	2.98356	0.0841139	1
BMS1P6	0.848765	0.778589	9.49817	0.00205677	1
BMX	0.778807	0.703163	8.5626	0.00343138	1
BNC1	0.804527	0.76399	2.645	0.103876	1
BNC2	0.756173	0.591241	37.152	1.09271e-09	2.42298e-05
BNIP1	0.787037	0.729927	5.00317	0.025301	1
BNIP2	0.782922	0.720195	5.96545	0.0145888	1
BNIP3	0.8107	0.756691	4.83778	0.0278427	1
BNIP3L	0.531893	0.437956	9.82404	0.00172245	1
BNIPL	0.446502	0.435523	0.100109	0.751699	1
BOC	0.868313	0.83455	2.43663	0.118531	1
BOD1	0.783951	0.720195	6.18152	0.0129092	1
BOD1L1	0.825103	0.734793	14.074	0.000175761	1
BOD1L2	0.766461	0.6618	15.7256	7.32257e-05	1
BOK	0.852881	0.80292	4.95032	0.0260858	1
BOK-AS1	0.851852	0.80292	4.72438	0.0297378	1
BOLA1	0.452675	0.450122	0.000788562	0.977597	1
BOLA2	0.602881	0.664234	4.36333	0.0367204	1
BOLA2B	0.604938	0.656934	3.09896	0.0783421	1
BOLA3	0.912551	0.861314	7.68417	0.00557074	1
BOLA3-AS1	0.91358	0.861314	8.05715	0.00453244	1
BOLL	0.872428	0.83455	3.15693	0.075605	1
BOP1	0.542181	0.467153	6.21733	0.0126506	1
BORA	0.660494	0.59854	4.55862	0.0327535	1
BPESC1	0.840535	0.810219	1.68482	0.194285	1
BPGM	0.773663	0.749392	0.819832	0.365229	1
BPHL	0.82716	0.793187	2.009	0.156368	1
BPI	0.763374	0.717762	2.96516	0.0850761	1
BPIFA1	0.797325	0.761557	1.99426	0.157896	1
BPIFA2	0.798354	0.761557	2.12189	0.145208	1
BPIFA3	0.797325	0.761557	1.99426	0.157896	1
BPIFA4P	0.797325	0.761557	1.99426	0.157896	1
BPIFB1	0.799383	0.76399	1.96512	0.160967	1
BPIFB2	0.794239	0.759124	1.89975	0.168106	1
BPIFB3	0.794239	0.759124	1.89975	0.168106	1
BPIFB4	0.795267	0.759124	2.02356	0.154876	1
BPIFB6	0.794239	0.756691	2.18149	0.139679	1
BPIFC	0.660494	0.613139	2.63072	0.104814	1
BPNT1	0.397119	0.381995	0.217282	0.641119	1
BPTF	0.693416	0.605839	9.58967	0.00195675	1
BRAF	0.768519	0.754258	0.251719	0.615867	1
BRAP	0.819959	0.785888	1.9617	0.161332	1
BRAT1	0.781893	0.742092	2.36434	0.124136	1
BRCA1	0.696502	0.540146	30.3589	3.59065e-08	0.00079619
BRCA2	0.688272	0.596107	10.5407	0.00116772	1
BRCC3	0.738683	0.708029	1.22477	0.268427	1
BRD1	0.649177	0.622871	0.758421	0.383823	1
BRD2	0.849794	0.810219	3.0479	0.0808418	1
BRD3	0.778807	0.722628	4.72341	0.0297546	1
BRD4	0.830247	0.749392	11.5755	0.000668265	1
BRD7	0.417695	0.489051	5.68599	0.0171009	1
BRD7P3	0.715021	0.639903	7.30825	0.00686387	1
BRD8	0.789095	0.686131	16.1602	5.82044e-05	1
BRD9	0.777778	0.710462	6.76904	0.00927526	1
BRDT	0.740741	0.686131	4.04664	0.0442594	1
BRE	0.864198	0.844282	0.78527	0.375534	1
BRF1	0.730453	0.676399	3.87576	0.0489882	1
BRF2	0.572016	0.472019	11.2376	0.000801582	1
BRI3	0.79321	0.746959	3.33064	0.0680004	1
BRI3BP	0.822016	0.793187	1.39778	0.237096	1
BRICD5	0.564815	0.618005	3.14131	0.0763324	1
BRINP1	0.809671	0.759124	4.21827	0.039991	1
BRINP2	0.40535	0.396594	0.0592665	0.807659	1
BRINP3	0.406379	0.384428	0.492113	0.482986	1
BRIP1	0.68107	0.564477	16.6739	4.43872e-05	0.984241
BRIX1	0.81893	0.756691	6.62065	0.0100803	1
BRK1	0.809671	0.76399	3.43719	0.0637442	1
BRMS1	0.789095	0.776156	0.215179	0.642738	1
BRMS1L	0.76749	0.710462	4.71747	0.0298577	1
BROX	0.391975	0.367397	0.637054	0.424779	1
BRPF1	0.817901	0.77129	3.69298	0.0546421	1
BRPF3	0.854938	0.844282	0.182245	0.669451	1
BRS3	0.745885	0.703163	2.48107	0.115224	1
BRSK1	0.833333	0.783455	4.50771	0.0337424	1
BRSK2	0.779835	0.683698	13.7771	0.000205833	1
BRWD1	0.835391	0.783455	4.93187	0.0263657	1
BRWD1-AS1	0.837449	0.785888	4.90465	0.0267844	1
BRWD1-IT2	0.837449	0.785888	4.90465	0.0267844	1
BRWD3	0.75823	0.710462	3.21462	0.0729831	1
BSCL2	0.806584	0.768856	2.29976	0.129394	1
BSDC1	0.795267	0.703163	13.2368	0.000274505	1
BSG	0.761317	0.656934	15.4537	8.45526e-05	1
BSN	0.75	0.676399	7.53717	0.00604388	1
BSN-AS2	0.751029	0.676399	7.76747	0.00531955	1
BSND	0.802469	0.710462	13.5058	0.000237833	1
BSPH1	0.84465	0.79562	4.58164	0.0323162	1
BSPRY	0.774691	0.742092	1.53101	0.215962	1
BST1	0.823045	0.734793	13.3563	0.000257554	1
BST2	0.842593	0.783455	6.59407	0.0102319	1
BSX	0.602881	0.552311	2.84371	0.0917321	1
BTAF1	0.802469	0.754258	3.73743	0.0532061	1
BTBD1	0.805556	0.761557	3.13798	0.0764887	1
BTBD10	0.808642	0.729927	10.1518	0.00144157	1
BTBD11	0.84465	0.798054	4.13641	0.04197	1
BTBD16	0.817901	0.77129	3.69298	0.0546421	1
BTBD17	0.70679	0.632603	7.02489	0.00803843	1
BTBD18	0.803498	0.773723	1.39221	0.238032	1
BTBD19	0.797325	0.703163	13.907	0.000192078	1
BTBD2	0.768519	0.671533	13.6121	0.000224732	1
BTBD3	0.777778	0.734793	2.73455	0.0981992	1
BTBD6	0.73251	0.676399	4.19939	0.0404386	1
BTBD7	0.759259	0.690998	6.62853	0.0100358	1
BTBD8	0.738683	0.683698	4.08447	0.0432789	1
BTBD9	0.84465	0.827251	0.526269	0.468179	1
BTC	0.863169	0.812652	5.33824	0.0208625	1
BTD	0.824074	0.776156	4.00132	0.0454645	1
BTF3	0.778807	0.6691	17.7827	2.47629e-05	0.549092
BTF3L4	0.746914	0.676399	6.86953	0.00876776	1
BTF3P11	0.668724	0.615572	3.37048	0.0663744	1
BTG1	0.846708	0.785888	7.10244	0.00769791	1
BTG2	0.393004	0.364964	0.844733	0.358047	1
BTG3	0.823045	0.761557	6.56525	0.0103989	1
BTG4	0.593621	0.542579	2.88049	0.0896589	1
BTK	0.75823	0.688564	6.8867	0.00868396	1
BTLA	0.867284	0.844282	1.08841	0.296824	1
BTN1A1	0.854938	0.80292	5.42085	0.0198977	1
BTN2A1	0.854938	0.800487	5.93649	0.0148305	1
BTN2A2	0.854938	0.800487	5.93649	0.0148305	1
BTN2A3P	0.854938	0.800487	5.93649	0.0148305	1
BTN3A1	0.854938	0.800487	5.93649	0.0148305	1
BTN3A2	0.854938	0.800487	5.93649	0.0148305	1
BTN3A3	0.854938	0.800487	5.93649	0.0148305	1
BTNL10	0.40535	0.355231	2.8417	0.0918467	1
BTNL2	0.855967	0.824818	1.92611	0.165184	1
BTNL3	0.778807	0.703163	8.5626	0.00343138	1
BTNL8	0.787037	0.708029	9.55472	0.00199436	1
BTNL9	0.795267	0.712895	10.6323	0.00111129	1
BTRC	0.809671	0.761557	3.81823	0.0506977	1
BUB1	0.902263	0.875912	1.85432	0.173282	1
BUB1B	0.765432	0.6691	13.3306	0.00026111	1
BUB3	0.816872	0.773723	3.14523	0.0761493	1
BUD13	0.591564	0.53528	3.51741	0.0607271	1
BUD31	0.789095	0.746959	2.71794	0.0992263	1
BVES	0.693416	0.639903	3.54498	0.0597259	1
BVES-AS1	0.694444	0.639903	3.69159	0.0546875	1
BYSL	0.825103	0.805353	0.633327	0.426137	1
BZRAP1	0.6893	0.588808	12.5456	0.00039714	1
BZRAP1-AS1	0.683128	0.591241	10.4017	0.00125902	1
BZW1	0.86214	0.805353	6.69444	0.00967143	1
BZW2	0.794239	0.751825	2.80106	0.0942022	1
C10orf10	0.866255	0.810219	6.66672	0.00982298	1
C10orf105	0.828189	0.781022	3.94156	0.0471072	1
C10orf107	0.847737	0.778589	9.18425	0.00244107	1
C10orf11	0.807613	0.742092	7.03944	0.00797339	1
C10orf111	0.838477	0.793187	3.79653	0.051359	1
C10orf113	0.838477	0.785888	5.12562	0.0235752	1
C10orf12	0.819959	0.778589	2.92175	0.0873931	1
C10orf120	0.816872	0.776156	2.79437	0.0945961	1
C10orf126	0.841564	0.805353	2.44304	0.118048	1
C10orf128	0.851852	0.77129	12.5993	0.000385894	1
C10orf131	0.820988	0.781022	2.7341	0.0982269	1
C10orf2	0.813786	0.766423	3.75516	0.0526447	1
C10orf25	0.866255	0.815085	5.56963	0.0182746	1
C10orf35	0.843621	0.768856	10.5028	0.00119194	1
C10orf53	0.851852	0.776156	11.1663	0.000832963	1
C10orf54	0.828189	0.781022	3.94156	0.0471072	1
C10orf55	0.792181	0.749392	2.8328	0.0923573	1
C10orf62	0.819959	0.781022	2.58148	0.108121	1
C10orf67	0.84465	0.800487	3.71259	0.0540036	1
C10orf71	0.849794	0.77129	11.8713	0.000570056	1
C10orf71-AS1	0.850823	0.77129	12.2319	0.000469792	1
C10orf76	0.811728	0.76399	3.78659	0.0516649	1
C10orf82	0.813786	0.781022	1.76566	0.18392	1
C10orf88	0.816872	0.773723	3.14523	0.0761493	1
C10orf90	0.822016	0.761557	6.32341	0.0119154	1
C10orf91	0.815844	0.754258	6.40906	0.011354	1
C10orf95	0.813786	0.761557	4.57408	0.0324593	1
C10orf99	0.826132	0.781022	3.57125	0.0587881	1
C11orf1	0.590535	0.542579	2.52771	0.111862	1
C11orf16	0.791152	0.708029	10.6902	0.00107703	1
C11orf21	0.771605	0.695864	8.41831	0.00371462	1
C11orf24	0.761317	0.754258	0.0448568	0.832268	1
C11orf31	0.803498	0.773723	1.39221	0.238032	1
C11orf40	0.778807	0.690998	11.4984	0.000696551	1
C11orf42	0.795267	0.70073	13.9289	0.000189857	1
C11orf44	0.599794	0.547445	3.04692	0.0808902	1
C11orf45	0.61214	0.557178	3.39881	0.0652437	1
C11orf49	0.819959	0.766423	4.9203	0.0265429	1
C11orf52	0.591564	0.542579	2.64268	0.104028	1
C11orf53	0.590535	0.547445	2.02538	0.15469	1
C11orf54	0.623457	0.59854	0.656503	0.417797	1
C11orf57	0.593621	0.542579	2.88049	0.0896589	1
C11orf58	0.813786	0.744526	8.03054	0.00459951	1
C11orf63	0.600823	0.552311	2.60643	0.106431	1
C11orf65	0.584362	0.542579	1.89271	0.168897	1
C11orf68	0.795267	0.785888	0.102751	0.748553	1
C11orf70	0.595679	0.56691	0.871144	0.350639	1
C11orf71	0.596708	0.547445	2.6827	0.101444	1
C11orf72	0.773663	0.759124	0.26701	0.605344	1
C11orf73	0.643004	0.608273	1.35364	0.244642	1
C11orf74	0.828189	0.756691	9.02525	0.00266275	1
C11orf80	0.780864	0.76399	0.380883	0.537131	1
C11orf84	0.797325	0.773723	0.833816	0.361171	1
C11orf85	0.805556	0.76399	2.7943	0.0946001	1
C11orf86	0.779835	0.76399	0.330131	0.565582	1
C11orf87	0.595679	0.542579	3.12883	0.076919	1
C11orf88	0.592593	0.542579	2.76027	0.096632	1
C11orf91	0.820988	0.761557	6.08684	0.0136193	1
C11orf94	0.839506	0.776156	7.45279	0.0063338	1
C11orf95	0.799383	0.781022	0.488271	0.4847	1
C11orf96	0.839506	0.783455	5.84716	0.0156022	1
C12orf10	0.869342	0.815085	6.36344	0.0116496	1
C12orf29	0.846708	0.783455	7.67374	0.00560302	1
C12orf4	0.815844	0.717762	15.9806	6.39952e-05	1
C12orf40	0.878601	0.822384	7.20413	0.00727359	1
C12orf42	0.847737	0.800487	4.31678	0.0377383	1
C12orf43	0.792181	0.744526	3.52752	0.0603579	1
C12orf45	0.849794	0.800487	4.74899	0.0293154	1
C12orf49	0.824074	0.785888	2.5222	0.112254	1
C12orf50	0.846708	0.783455	7.67374	0.00560302	1
C12orf54	0.860082	0.824818	2.54212	0.110846	1
C12orf56	0.841564	0.800487	3.15981	0.075472	1
C12orf57	0.806584	0.722628	11.4423	0.000717917	1
C12orf60	0.804527	0.708029	14.9169	0.00011235	1
C12orf65	0.784979	0.73236	4.21536	0.0400594	1
C12orf66	0.850823	0.807786	3.63103	0.0567118	1
C12orf71	0.826132	0.746959	10.9345	0.0009439	1
C12orf73	0.846708	0.805353	3.28252	0.0700214	1
C12orf74	0.847737	0.788321	6.81458	0.00904167	1
C12orf75	0.843621	0.79562	4.36972	0.0365829	1
C12orf76	0.824074	0.798054	1.13669	0.286352	1
C12orf77	0.800412	0.744526	4.99928	0.0253579	1
C12orf80	0.852881	0.788321	8.22408	0.00413383	1
C14orf1	0.757202	0.698297	4.90396	0.0267951	1
C14orf105	0.789095	0.756691	1.58094	0.208625	1
C14orf119	0.805556	0.756691	3.88219	0.0488009	1
C14orf132	0.770576	0.686131	10.4156	0.00124954	1
C14orf142	0.759259	0.688564	7.10949	0.00766767	1
C14orf159	0.754115	0.681265	7.45575	0.00632342	1
C14orf166	0.796296	0.754258	2.76949	0.0960766	1
C14orf169	0.72428	0.659367	5.54428	0.0185412	1
C14orf177	0.768519	0.695864	7.68681	0.00556258	1
C14orf178	0.743827	0.681265	5.36409	0.0205556	1
C14orf180	0.734568	0.673966	4.92917	0.026407	1
C14orf2	0.760288	0.705596	4.25426	0.039152	1
C14orf28	0.806584	0.761557	3.30109	0.0692338	1
C14orf37	0.786008	0.754258	1.50027	0.220629	1
C14orf39	0.778807	0.737226	2.5625	0.109425	1
C14orf79	0.733539	0.671533	5.1513	0.023229	1
C14orf80	0.727366	0.676399	3.4165	0.0645477	1
C14orf93	0.796296	0.756691	2.45118	0.117437	1
C15orf32	0.804527	0.744526	5.84485	0.0156227	1
C15orf38-AP3S2	0.787037	0.727494	5.44047	0.0196754	1
C15orf39	0.805556	0.742092	6.55997	0.0104298	1
C15orf40	0.805556	0.761557	3.13798	0.0764887	1
C15orf41	0.770576	0.705596	6.18393	0.0128916	1
C15orf43	0.762346	0.666667	13.0555	0.000302402	1
C15orf48	0.764403	0.683698	9.37356	0.00220137	1
C15orf52	0.764403	0.671533	12.3728	0.000435634	1
C15orf53	0.774691	0.693431	9.75828	0.00178517	1
C15orf54	0.773663	0.690998	10.0671	0.00150942	1
C15orf56	0.765432	0.6691	13.3306	0.00026111	1
C15orf57	0.746914	0.652068	12.3888	0.000431919	1
C15orf59	0.811728	0.756691	5.04325	0.024722	1
C15orf61	0.826132	0.759124	7.87837	0.00500296	1
C15orf65	0.814815	0.720195	14.8529	0.000116232	1
C16orf45	0.58642	0.676399	9.48404	0.00207267	1
C16orf46	0.372428	0.450122	6.97168	0.00828095	1
C16orf47	0.38786	0.445255	3.71448	0.0539424	1
C16orf52	0.589506	0.664234	6.48021	0.0109082	1
C16orf54	0.600823	0.656934	3.6166	0.0572058	1
C16orf58	0.608025	0.6618	3.33481	0.0678281	1
C16orf59	0.570988	0.63017	3.93731	0.0472262	1
C16orf62	0.583333	0.6691	8.56537	0.00342617	1
C16orf70	0.383745	0.447689	4.64787	0.0310921	1
C16orf71	0.572016	0.63747	4.85411	0.0275803	1
C16orf72	0.563786	0.647202	7.95936	0.00478393	1
C16orf74	0.378601	0.452555	6.27504	0.012245	1
C16orf78	0.425926	0.49635	5.51457	0.0188587	1
C16orf82	0.605967	0.671533	5.02458	0.02499	1
C16orf86	0.381687	0.447689	4.96625	0.0258466	1
C16orf87	0.429012	0.501217	5.79532	0.0160689	1
C16orf89	0.566872	0.644769	6.92745	0.00848826	1
C16orf90	0.573045	0.639903	5.07602	0.0242591	1
C16orf91	0.550412	0.59854	2.52974	0.111719	1
C16orf92	0.602881	0.656934	3.35294	0.067085	1
C16orf95	0.376543	0.447689	5.81061	0.0159298	1
C16orf96	0.573045	0.63747	4.70122	0.0301412	1
C16orf97	0.412551	0.493917	7.44668	0.00635536	1
C17orf100	0.529835	0.408759	16.4597	4.96949e-05	1
C17orf102	0.667695	0.564477	12.867	0.000334429	1
C17orf105	0.710905	0.540146	36.7859	1.31842e-09	2.92347e-05
C17orf107	0.538066	0.413625	17.3982	3.03109e-05	0.672113
C17orf112	0.701646	0.613139	9.92067	0.00163433	1
C17orf47	0.682099	0.576642	13.6745	0.000217386	1
C17orf49	0.524691	0.406326	15.725	7.32505e-05	1
C17orf50	0.700617	0.564477	23.2606	1.41467e-06	0.031369
C17orf51	0.610082	0.484185	18.1981	1.99077e-05	0.441434
C17orf53	0.710905	0.545012	34.7704	3.70969e-09	8.22586e-05
C17orf58	0.696502	0.605839	10.3256	0.00131196	1
C17orf62	0.701646	0.600973	12.8239	0.000342224	1
C17orf64	0.677984	0.552311	19.274	1.1324e-05	0.251097
C17orf67	0.699588	0.608273	10.5249	0.00117774	1
C17orf74	0.523663	0.391727	19.6072	9.51107e-06	0.210898
C17orf75	0.691358	0.593674	11.8915	0.000563912	1
C17orf77	0.707819	0.63747	6.32412	0.0119107	1
C17orf78	0.695473	0.56691	20.6276	5.57871e-06	0.123702
C17orf80	0.712963	0.632603	8.33547	0.00388784	1
C17orf82	0.683128	0.564477	17.3089	3.17699e-05	0.704465
C17orf89	0.705761	0.603406	13.3395	0.000259869	1
C17orf96	0.673868	0.523114	27.4916	1.57777e-07	0.00349854
C17orf97	0.533951	0.442822	9.23584	0.00237323	1
C17orf98	0.675926	0.520681	29.1969	6.53843e-08	0.00144983
C17orf99	0.702675	0.618005	9.0944	0.00256393	1
C18orf21	0.781893	0.681265	15.1484	9.93807e-05	1
C18orf25	0.760288	0.6691	11.8168	0.000587002	1
C18orf32	0.759259	0.6618	13.4393	0.000246408	1
C18orf42	0.779835	0.678832	15.1751	9.79866e-05	1
C18orf54	0.763374	0.659367	15.4194	8.60994e-05	1
C18orf63	0.746914	0.664234	9.4375	0.00212593	1
C18orf8	0.786008	0.673966	18.884	1.38914e-05	0.308027
C19orf12	0.865226	0.805353	7.55282	0.00599163	1
C19orf18	0.816872	0.768856	3.90594	0.0481156	1
C19orf24	0.766461	0.673966	12.3367	0.000444135	1
C19orf25	0.766461	0.671533	12.9838	0.000314203	1
C19orf33	0.845679	0.812652	2.06217	0.150995	1
C19orf35	0.77572	0.676399	14.5263	0.000138215	1
C19orf38	0.817901	0.749392	7.97757	0.00473604	1
C19orf43	0.826132	0.754258	9.04561	0.00263326	1
C19orf44	0.842593	0.77129	9.53071	0.00202062	1
C19orf45	0.806584	0.73236	8.98008	0.00272939	1
C19orf47	0.853909	0.812652	3.38617	0.0657455	1
C19orf48	0.838477	0.805353	2.00484	0.156798	1
C19orf52	0.816872	0.749392	7.71313	0.00548206	1
C19orf53	0.820988	0.754258	7.6607	0.00564366	1
C19orf54	0.861111	0.817518	3.93053	0.047417	1
C19orf57	0.824074	0.754258	8.47526	0.00360009	1
C19orf60	0.850823	0.785888	8.23694	0.00410463	1
C19orf66	0.819959	0.751825	7.95192	0.00480365	1
C19orf67	0.829218	0.759124	8.71537	0.00315539	1
C19orf68	0.842593	0.80292	2.95824	0.0854409	1
C19orf70	0.822016	0.720195	17.5514	2.7964e-05	0.620074
C19orf71	0.786008	0.693431	13.0145	0.000309096	1
C19orf73	0.834362	0.800487	2.06079	0.151131	1
C19orf81	0.839506	0.800487	2.81903	0.0931525	1
C19orf84	0.833333	0.805353	1.37871	0.24032	1
C1D	0.901235	0.86618	3.29796	0.0693659	1
C1GALT1	0.800412	0.76399	2.09233	0.14804	1
C1GALT1C1	0.748971	0.690998	4.65487	0.0309655	1
C1orf100	0.397119	0.379562	0.303596	0.581637	1
C1orf101	0.396091	0.381995	0.185304	0.666854	1
C1orf105	0.416667	0.403893	0.14531	0.703059	1
C1orf106	0.409465	0.389294	0.408083	0.522944	1
C1orf109	0.811728	0.727494	11.7172	0.000619245	1
C1orf111	0.407407	0.381995	0.675055	0.411295	1
C1orf112	0.425926	0.413625	0.13228	0.71608	1
C1orf115	0.395062	0.381995	0.155852	0.693004	1
C1orf116	0.384774	0.360097	0.647213	0.421111	1
C1orf122	0.812757	0.73236	10.7324	0.00105273	1
C1orf123	0.809671	0.710462	16.0046	6.31893e-05	1
C1orf127	0.743827	0.671533	7.1712	0.0074083	1
C1orf131	0.410494	0.350365	4.13091	0.0421067	1
C1orf137	0.825103	0.754258	8.75767	0.00308303	1
C1orf141	0.80144	0.734793	7.13188	0.00757255	1
C1orf145	0.40535	0.360097	2.29585	0.12972	1
[truncated: 20,176 more rows]

## Sheet: Supplementary Table S9
Supplementary Table S9 KS test of METABRIC cohort between CNA and mRNA z score
geneName	pvalue
A1BG	0.239221
A1CF	0.787251
A2M	0.524323
A3GALT2	0.65275
A4GALT	0.835063
A4GNT	0.743738
AAAS	0.784649
AACS	0.957835
AADAC	0.0311659
AADACL2	0.0508691
AADACL3	0.875026
AADACL4	0.991009
AADAT	0.515892
AAK1	0.40789
AAMP	0.555892
AANAT	0.539311
AARS	0.267115
AARS2	0.102038
AARSD1	0.467625
AASDH	0.933699
AASDHPPT	0.596355
AASS	0.357805
AATF	0.617159
AATK	0.347646
ABAT	0.151524
ABCA1	0.638167
ABCA10	0.685336
ABCA11P	0.842954
ABCA12	0.485633
ABCA13	0.47485
ABCA17P	0.745313
ABCA2	0.195652
ABCA3	0.597634
ABCA4	0.35567
ABCA5	0.0716873
ABCA6	0.953745
ABCA7	0.170847
ABCA8	0.936731
ABCA9	0.748841
ABCB1	0.366039
ABCB10	0.885186
ABCB11	0.0918772
ABCB4	0.863479
ABCB5	0.358943
ABCB6	0.406553
ABCB7	0.421539
ABCB8	0.219703
ABCB9	0.404112
ABCC1	0.995473
ABCC10	0.528118
ABCC11	0.736144
ABCC12	0.319367
ABCC13	0.711905
ABCC2	0.681779
ABCC3	0.441832
ABCC4	0.386842
ABCC5	0.420585
ABCC6	0.819452
ABCC8	0.691702
ABCC9	0.979743
ABCD1	0.452816
ABCD2	0.230115
ABCD3	0.44072
ABCD4	0.686754
ABCE1	0.361648
ABCF1	0.60807
ABCF2	0.695097
ABCF3	0.799761
ABCG1	0.988986
ABCG2	0.222249
ABCG4	0.931045
ABCG5	0.276812
ABCG8	0.4876
ABHD1	0.764909
ABHD11	0.936748
ABHD12	0.837726
ABHD12B	0.793212
ABHD13	0.356232
ABHD14A	0.49546
ABHD14B	0.637776
ABHD15	0.853499
ABHD16A	0.937777
ABHD16B	0.517326
ABHD2	0.924023
ABHD3	0.719261
ABHD4	0.705072
ABHD5	0.0560783
ABHD6	0.123329
ABHD8	0.537743
ABI1	0.150477
ABI2	0.290382
ABI3	0.667888
ABI3BP	0.191951
ABL1	0.156031
ABL2	0.924961
ABLIM1	0.226807
ABLIM2	0.124692
ABLIM3	0.578342
ABO	0.671372
ABR	0.122699
ABRA	0.391136
ABT1	0.952582
ABTB1	0.0623745
ABTB2	0.341108
ACAA1	0.633433
ACAA2	0.160035
ACACA	0.281296
ACACB	0.922245
ACAD10	0.289542
ACAD8	0.93904
ACAD9	0.0186998
ACADM	0.552034
ACADSB	0.0362157
ACADVL	0.214339
ACAN	0.361694
ACAP1	0.987408
ACAP2	0.0424368
ACAP3	0.160282
ACAT1	0.549226
ACAT2	0.229356
ACBD3	0.866054
ACBD4	0.538553
ACBD5	0.407827
ACBD6	0.493062
ACCS	0.636614
ACCSL	0.0233804
ACD	0.884507
ACE	0.27461
ACE2	0.781859
ACER1	0.374966
ACER2	0.355463
ACER3	0.463039
ACHE	0.586274
ACIN1	0.535451
ACLY	0.0896416
ACMSD	0.479135
ACO1	0.752116
ACO2	0.969134
ACOT1	0.136321
ACOT11	0.0548269
ACOT12	0.119182
ACOT13	0.190558
ACOT2	0.079339
ACOT4	0.0143811
ACOT6	0.241264
ACOT7	0.779707
ACOT8	0.405828
ACOT9	0.605269
ACOX1	0.313404
ACOX2	0.185212
ACOX3	0.990174
ACOXL	0.532398
ACP1	0.882263
ACP2	0.914134
ACP5	0.166073
ACP6	0.388039
ACPP	0.5271
ACPT	0.0828278
ACR	0.102064
ACRBP	0.320696
ACRC	0.3547
ACRV1	0.09535
ACSBG1	0.905612
ACSBG2	0.843024
ACSF3	0.373655
ACSL1	0.353439
ACSL3	0.322177
ACSL4	0.548857
ACSL5	0.573274
ACSL6	0.549602
ACSM1	0.234035
ACSM2A	0.631432
ACSM2B	0.468303
ACSM3	0.671535
ACSM4	0.0512298
ACSM5	0.501526
ACSS1	0.868911
ACSS2	0.780618
ACSS3	0.0721741
ACTA1	0.284334
ACTA2	0.453818
ACTB	0.0607956
ACTBL2	0.604475
ACTC1	0.114655
ACTG1	0.599236
ACTG2	0.676661
ACTL6A	0.291416
ACTL6B	0.646343
ACTL7A	0.0281913
ACTL7B	0.917935
ACTL8	0.156644
ACTL9	0.16714
ACTN1	0.161572
ACTN2	0.882369
ACTN3	0.230341
ACTN4	0.475531
ACTR10	0.0467292
ACTR1A	0.823012
ACTR1B	0.893779
ACTR2	0.292684
ACTR3	0.844743
ACTR3B	0.148694
ACTR3BP5	0.867014
ACTR5	0.764723
ACTR6	0.56752
ACTR8	0.141288
ACTRT1	0.407162
ACTRT2	0.28783
ACVR1	0.219485
ACVR1B	0.0718992
ACVR1C	0.482025
ACVR2A	0.553
ACVR2B	0.941215
ACVRL1	0.0977028
ACY1	0.671212
ACY3	0.740491
ACYP1	0.657195
ACYP2	0.536458
ADA	0.467494
ADAD1	0.130321
ADAD2	0.726878
ADAL	0.978428
ADAM10	0.172113
ADAM11	0.338324
ADAM12	0.13414
ADAM15	0.949694
ADAM17	0.254908
ADAM18	0.194675
ADAM19	0.981325
ADAM2	0.392053
ADAM20	0.848194
ADAM21	0.521155
ADAM22	0.311675
ADAM23	0.768267
ADAM28	0.60773
ADAM29	0.960332
ADAM30	0.89022
ADAM32	0.698419
ADAM33	0.984543
ADAM6	0.931798
ADAM7	0.169506
ADAM8	0.420987
ADAM9	0.694381
ADAMDEC1	0.441291
ADAMTS1	0.765304
ADAMTS10	0.155892
ADAMTS12	0.69813
ADAMTS13	0.6746
ADAMTS14	0.698881
ADAMTS15	0.890941
ADAMTS16	0.877884
ADAMTS17	0.574534
ADAMTS18	0.245056
ADAMTS2	0.316742
ADAMTS20	0.514211
ADAMTS3	0.404299
ADAMTS5	0.80772
ADAMTS6	0.597222
ADAMTS7	0.248051
ADAMTS8	0.699333
ADAMTS9	0.435711
ADAMTSL1	0.351323
ADAMTSL2	0.0652739
ADAMTSL3	0.748176
ADAMTSL4	0.636034
ADAMTSL5	0.638091
ADAP1	0.961855
ADAP2	0.511475
ADAR	0.691871
ADARB1	0.173684
ADARB2-AS1	0.75352
ADAT2	0.307137
ADCK1	0.352921
ADCK2	0.541001
ADCK3	0.0177823
ADCK4	0.860389
ADCK5	0.73877
ADCY1	0.696269
ADCY10	0.115595
ADCY2	0.191655
ADCY3	0.162605
ADCY4	0.802288
ADCY5	0.807104
ADCY6	0.851685
ADCY7	0.582129
ADCY8	0.232191
ADCY9	0.368603
ADCYAP1	0.204408
ADCYAP1R1	0.960688
ADD1	0.955005
ADD2	0.515952
ADD3	0.256174
ADH1A	0.119064
ADH1C	0.268618
ADH4	0.433767
ADH5	0.344009
ADH6	0.854686
ADH7	0.0713272
ADHFE1	0.991339
ADI1	0.663527
ADIG	0.806226
ADIPOR1	0.228663
ADIPOR2	0.136953
ADK	0.976982
ADM	0.48789
ADNP	0.184315
ADNP2	0.974221
ADO	0.0193639
ADORA1	0.569687
ADORA2A	0.691015
ADORA2B	0.151595
ADORA3	0.712251
ADPGK	0.52445
ADPRH	0.0571998
ADPRHL1	0.638981
ADPRHL2	0.00718015
ADRA1A	0.393502
ADRA1B	0.38886
ADRA1D	0.8249
ADRA2A	0.0710085
ADRA2B	0.873344
ADRA2C	0.704472
ADRB1	0.665857
ADRB2	0.51321
ADRB3	0.879099
ADRBK2	0.415439
ADRM1	0.846318
ADSL	0.0711607
ADSS	0.108567
ADSSL1	0.302219
AEBP1	0.077071
AEBP2	0.104146
AEN	0.0348475
AES	0.329346
AFAP1	0.783862
AFAP1L2	0.0891644
AFF1	0.676929
AFF2	0.229959
AFF3	0.142858
AFF4	0.213039
AFG3L1P	0.66087
AFG3L2	0.462927
AFM	0.82852
AFMID	0.021265
AFP	0.496946
AFTPH	0.0457013
AGA	0.332112
AGAP1	0.978272
AGAP2	0.553165
AGAP3	0.0728438
AGAP4	0.859787
AGAP6	0.789808
AGBL1	0.787655
AGBL2	0.159545
AGBL4	0.781159
AGBL5	0.094808
AGER	0.509466
AGFG1	0.79267
AGFG2	0.46926
AGGF1	0.152555
AGL	0.34997
AGMAT	0.192528
AGMO	0.75713
AGPAT1	0.298785
AGPAT2	0.742869
AGPAT3	0.589674
AGPAT4	0.965031
AGPAT5	0.642725
AGPS	0.979949
AGR2	0.393832
AGR3	0.703776
AGRN	0.392569
AGRP	0.574105
AGT	0.977882
AGTPBP1	0.846457
AGTR1	0.197298
AGTR2	0.213919
AGTRAP	0.431606
AGXT	0.145478
AHCTF1	0.477158
AHCY	0.981607
AHCYL1	0.873661
AHCYL2	0.510276
AHDC1	0.32962
AHI1	0.364943
AHNAK	0.519288
AHNAK2	0.993818
AHR	0.37075
AHRR	0.633878
AHSA1	0.848361
AHSA2	0.465715
AHSG	0.225445
AHSP	0.981954
AICDA	0.652649
AIDA	0.0497111
AIF1	0.309599
AIF1L	0.348515
AIFM1	0.651225
AIFM2	0.954507
AIFM3	0.15825
AIG1	0.922212
AIM1	0.489981
AIM1L	0.76072
AIM2	0.141133
AIMP1	0.83568
AIMP2	0.313539
AIP	0.516578
AIPL1	0.559292
AIRE	0.0206931
AJAP1	0.317182
AK2	0.402628
AK3	0.786624
AK4	0.100609
AK5	0.965935
AK7	0.153611
AK8	0.274313
AKAP1	0.369185
AKAP10	0.880894
AKAP11	0.799069
AKAP12	0.971531
AKAP13	0.350075
AKAP14	0.0479256
AKAP2	0.0717511
AKAP3	0.259515
AKAP4	0.737144
AKAP5	0.0145937
AKAP7	0.901673
AKAP8	0.706433
AKAP8L	0.759301
AKAP9	0.943292
AKIP1	0.422617
AKIRIN1	0.646013
AKIRIN2	0.792796
AKNA	0.812916
AKNAD1	0.707688
AKR1A1	0.922682
AKR1B1	0.537859
AKR1B10	0.625653
AKR1B15	0.594762
AKR1C1	0.985945
AKR1C2	0.485286
AKR1C3	0.27304
AKR1C4	0.332008
AKR1D1	0.987323
AKR1E2	0.135716
AKR7A2	0.415187
AKR7A3	0.177699
AKT1	0.116587
AKT1S1	0.809917
AKT2	0.527944
AKT3	0.796111
AKTIP	0.923384
ALAD	0.458853
ALAS1	0.499457
ALAS2	0.21927
ALB	0.844121
ALCAM	0.641107
ALDH16A1	0.239936
ALDH18A1	0.0616736
ALDH1A1	0.611846
ALDH1A2	0.786998
ALDH1A3	0.419977
ALDH1L1	0.34604
ALDH1L2	0.31498
ALDH2	0.442459
ALDH3A1	0.830521
ALDH3A2	0.418284
ALDH3B1	0.417761
ALDH3B2	0.925663
ALDH4A1	0.478881
ALDH5A1	0.142986
ALDH6A1	0.691916
ALDH7A1	0.998586
ALDH8A1	0.155735
ALDH9A1	0.686097
ALDOA	0.694114
ALDOB	0.68143
ALDOC	0.864736
ALG1	0.253148
ALG10B	0.291749
ALG11	0.349049
ALG12	0.540539
ALG13	0.247549
ALG14	0.94161
ALG1L	0.279161
ALG1L2	0.303176
ALG2	0.11892
ALG3	0.986703
ALG5	0.393582
ALG6	0.356194
ALG8	0.794104
ALG9	0.464136
ALK	0.435255
ALKBH1	0.13684
ALKBH2	0.281819
ALKBH3	0.0369861
ALKBH4	0.836846
ALKBH5	0.292098
ALKBH6	0.601246
ALKBH7	0.292753
ALKBH8	0.732001
ALLC	0.247938
ALMS1	0.963071
ALOX12	0.545093
ALOX12B	0.117816
ALOX15	0.484159
ALOX15B	0.67651
ALOX5	0.833656
ALOX5AP	0.968639
ALOXE3	0.694698
ALPI	0.200229
ALPK2	0.704026
ALPK3	0.944387
ALPL	0.755761
ALS2	0.369835
ALS2CL	0.962943
ALS2CR11	0.947686
ALS2CR12	0.532663
ALX1	0.907131
ALX3	0.518139
ALX4	0.280747
AMACR	0.0886431
AMBN	0.240897
AMBP	0.0114703
AMBRA1	0.385663
AMD1	0.812467
AMDHD1	0.719168
AMDHD2	0.553766
AMELX	0.454075
AMFR	0.689147
AMH	0.60222
AMHR2	0.900433
AMIGO1	0.171603
AMIGO3	0.917338
AMMECR1	0.547716
AMMECR1L	0.196238
AMN	0.958844
AMOT	0.325607
AMOTL1	0.222536
AMOTL2	0.637854
AMPD1	0.805153
AMPD2	0.550733
AMPD3	0.888368
AMPH	0.978741
AMT	0.476665
AMTN	0.135656
AMY1A	0.874631
AMY2A	0.569178
AMY2B	0.328584
AMZ2	0.719696
ANAPC1	0.819662
ANAPC10	0.120165
ANAPC11	0.892278
ANAPC13	0.864327
ANAPC16	0.924764
ANAPC2	0.650243
ANAPC4	0.180558
ANAPC5	0.654719
ANAPC7	0.829542
ANG	0.789607
ANGEL1	0.731128
ANGEL2	0.382869
ANGPT1	0.29923
ANGPT2	0.876191
ANGPT4	0.55999
ANGPTL1	0.370866
ANGPTL2	0.0734579
ANGPTL3	0.85439
ANGPTL4	0.131593
ANGPTL5	0.705379
ANGPTL6	0.635075
ANGPTL7	0.498863
ANK1	0.0200234
ANK2	0.633438
ANK3	0.0743561
ANKAR	0.0736161
ANKFN1	0.569864
ANKFY1	0.999557
ANKH	0.186987
ANKHD1	0.237771
ANKK1	0.0799192
ANKLE1	0.615548
ANKLE2	0.584308
ANKMY1	0.0702774
ANKMY2	0.190985
ANKRA2	0.348323
ANKRD1	0.546424
ANKRD10	0.772728
ANKRD11	0.412812
ANKRD12	0.585174
ANKRD13A	0.973309
ANKRD13B	0.0656703
ANKRD13C	0.633947
ANKRD13D	0.730098
ANKRD16	0.0906072
ANKRD17	0.218578
ANKRD2	0.911026
ANKRD20A3	0.973908
ANKRD20A4	0.152462
ANKRD20A5P	0.257671
ANKRD22	0.592003
ANKRD23	0.462119
ANKRD24	0.678689
ANKRD26	0.600617
ANKRD27	0.124547
ANKRD28	0.359767
ANKRD29	0.167232
ANKRD30A	0.325514
ANKRD30B	0.643814
ANKRD31	0.722657
ANKRD33	0.138163
ANKRD34A	0.464084
ANKRD34B	0.965716
ANKRD34C	0.431986
ANKRD35	0.490949
ANKRD36	0.984677
ANKRD36B	0.754572
ANKRD37	0.0490044
ANKRD39	0.304238
ANKRD40	0.552112
ANKRD42	0.259787
ANKRD44	0.176244
ANKRD46	0.725267
ANKRD49	0.183631
ANKRD50	0.272214
ANKRD53	0.997631
ANKRD55	0.425791
ANKRD6	0.350604
ANKRD7	0.0539849
ANKRD9	0.220546
ANKS1A	0.886033
ANKS1B	0.462584
ANKS3	0.740462
ANKS6	0.615557
ANKZF1	0.687841
ANLN	0.0981073
ANO1	0.33234
ANO10	0.352886
ANO2	0.815744
ANO3	0.264228
ANO4	0.340529
ANO5	0.585321
ANO6	0.308858
ANO7	0.73262
ANO8	0.636342
ANO9	0.548802
ANP32A	0.0426287
ANP32B	0.0492159
ANP32C	0.602439
ANP32D	0.0447659
ANP32E	0.945776
ANPEP	0.948875
ANTXR1	0.781834
ANTXR2	0.521998
ANTXRL	0.892057
ANXA1	0.116283
ANXA10	0.653313
ANXA11	0.1749
ANXA13	0.0773376
ANXA2	0.0428059
ANXA3	0.355864
ANXA4	0.723662
ANXA5	0.5736
ANXA7	0.288584
ANXA8	0.190288
ANXA9	0.200355
AOC2	0.796141
AOC3	0.758978
AOX1	0.642007
AP1AR	0.945585
AP1B1	0.165237
AP1G1	0.51225
AP1G2	0.477297
AP1M1	0.399263
AP1M2	0.576641
AP1S1	0.880604
AP1S2	0.252443
AP1S3	0.19248
AP2A1	0.640142
AP2A2	0.407799
AP2B1	0.780272
AP2M1	0.782955
AP2S1	0.647948
AP3B1	0.526651
AP3B2	0.102545
AP3D1	0.266497
AP3M1	0.209795
AP3M2	0.841431
AP3S1	0.0710661
AP4B1	0.739175
AP4E1	0.833274
AP4M1	0.832822
AP4S1	0.221169
APAF1	0.331923
APBA1	0.399502
APBA2	0.370857
APBA3	0.246672
APBB1	0.945114
APBB1IP	0.410922
APBB3	0.0744384
APC	0.541311
APC2	0.194
APCDD1	0.962411
APCDD1L	0.487775
APCS	0.0490442
APEH	0.349223
APEX1	0.642047
APEX2	0.61737
APH1A	0.297602
APH1B	0.625083
API5	0.294757
APIP	0.171058
APITD1	0.858903
APLN	0.00196497
APLNR	0.528236
APLP1	0.0524141
APLP2	0.422019
APOA1	0.0900779
APOA1BP	0.737446
APOA2	0.452926
APOA4	0.121573
APOA5	0.464068
APOB	0.356334
APOBEC1	0.358304
APOBEC2	0.0528695
APOBEC3A	0.307893
APOBEC3C	0.907342
APOBEC3D	0.798296
APOBEC3F	0.140954
APOBEC3G	0.357001
APOBEC3H	0.791722
APOBEC4	0.274303
APOC1	0.696129
APOC3	0.125304
APOC4-APOC2	0.572142
APOD	0.210989
APOE	0.368374
APOH	0.4023
APOL1	0.0789056
APOL2	0.295064
APOL3	0.644046
APOL4	0.601746
APOL5	0.790241
APOLD1	0.40087
APOM	0.167556
APOOL	0.187225
APP	0.097112
APPBP2	0.0166668
APPL1	0.582482
APPL2	0.133544
APRT	0.422583
APTX	0.574698
AQP1	0.983202
AQP10	0.0201961
AQP11	0.734778
AQP12B	0.0943498
AQP3	0.610006
AQP4	0.0669078
AQP5	0.164782
AQP6	0.0569799
AQP7	0.0789948
AQP7P1	0.812657
AQP8	0.188858
AQP9	0.106019
AQR	0.348021
AR	0.643674
ARAF	0.590862
ARAP1	0.739565
ARAP2	0.48815
ARAP3	0.913826
ARC	0.62363
ARCN1	0.578943
ARF1	0.723898
ARF3	0.311527
ARF4	0.359281
ARF5	0.177091
ARFGAP1	0.975475
ARFGAP2	0.366142
ARFGAP3	0.542939
ARFGEF1	0.278982
ARFGEF2	0.699807
ARFIP1	0.187945
ARFRP1	0.38675
ARG1	0.927083
ARG2	0.504038
ARGFXP2	0.750768
ARGLU1	0.909824
ARHGAP1	0.252159
ARHGAP10	0.967764
ARHGAP11A	0.838904
ARHGAP11B	0.287949
ARHGAP12	0.440769
ARHGAP15	0.257204
ARHGAP17	0.938604
ARHGAP18	0.826375
ARHGAP19	0.384714
ARHGAP20	0.933462
ARHGAP21	0.644831
ARHGAP22	0.448008
ARHGAP23	0.926808
ARHGAP24	0.174408
ARHGAP25	0.508605
ARHGAP26	0.84532
ARHGAP27	0.633603
ARHGAP28	0.543203
ARHGAP29	0.438984
ARHGAP30	0.21164
ARHGAP31	0.0013304
ARHGAP32	0.516794
ARHGAP33	0.772166
ARHGAP36	0.289831
ARHGAP39	0.460254
ARHGAP4	0.422239
ARHGAP42	0.835991
ARHGAP44	0.941134
ARHGAP5	0.0225226
ARHGAP6	0.207778
ARHGAP9	0.0416656
ARHGDIA	0.274308
ARHGDIB	0.545856
ARHGDIG	0.0237688
ARHGEF1	0.688776
ARHGEF10	0.0491873
ARHGEF10L	0.454477
ARHGEF11	0.708194
ARHGEF12	0.462396
ARHGEF15	0.206698
ARHGEF16	0.465339
ARHGEF17	0.182276
ARHGEF18	0.298593
ARHGEF19	0.549583
ARHGEF2	0.201382
ARHGEF25	0.87693
ARHGEF3	0.683796
ARHGEF33	0.234527
ARHGEF35	0.954928
ARHGEF37	0.860406
ARHGEF38	0.0699686
ARHGEF4	0.629964
ARHGEF40	0.770676
ARHGEF5	0.427049
ARHGEF6	0.975247
ARHGEF7	0.710927
ARHGEF9	0.126126
ARID1A	0.542596
ARID1B	0.796084
ARID2	0.850134
ARID3A	0.0312861
ARID3B	0.808437
ARID3C	0.0321308
ARID4A	0.873343
ARID4B	0.603734
ARID5A	0.82205
ARID5B	0.904961
ARIH1	0.121093
ARIH2	0.632648
ARL1	0.932863
ARL11	0.446508
ARL13A	0.425719
ARL13B	0.881809
ARL14	0.409372
ARL15	0.872026
ARL16	0.892107
ARL17B	0.8028
ARL2	0.0493289
ARL2BP	0.931783
ARL3	0.261395
ARL4A	0.227692
ARL4C	0.811663
ARL4D	0.067547
ARL5A	0.0531437
ARL5B	0.116149
ARL5C	0.654031
ARL6	0.480868
ARL6IP1	0.568725
ARL6IP4	0.891203
ARL6IP5	0.543902
ARL8A	0.785983
ARL8B	0.122506
ARL9	0.628846
ARMC1	0.316894
ARMC10	0.359055
ARMC2	0.742985
ARMC4	0.907322
ARMC5	0.00187579
ARMC6	0.152476
ARMC7	0.723374
ARMC8	0.993783
ARMC9	0.411484
ARMCX1	0.31237
ARMCX3	0.158797
ARMCX5	0.846241
ARMCX6	0.71544
ARNT	0.68378
ARNT2	0.282153
ARNTL	0.881696
ARNTL2	0.226952
ARPC1A	0.00147742
ARPC1B	0.523644
ARPC2	0.468686
ARPC3	0.381063
ARPC4	0.234423
ARPC5	0.931813
ARPC5L	0.196671
ARPP19	0.473829
ARPP21	0.50025
ARR3	0.530433
ARRB1	0.957331
ARRB2	0.00534943
ARRDC1	0.846752
ARRDC2	0.886986
ARRDC3	0.0683855
ARRDC4	0.370357
ARRDC5	0.441189
ARSA	0.71162
ARSB	0.507906
ARSD	0.942038
ARSE	0.2033
ARSF	0.204817
ARSG	0.879706
ARSH	0.196092
ARSI	0.556128
ARSJ	0.833199
ARSK	0.405452
ART1	0.435368
ART3	0.889075
ART4	0.257622
ART5	0.522127
ARTN	0.984771
ARV1	0.758947
ARVCF	0.108425
ARX	0.208611
ASAH1	0.57389
ASAH2	0.826801
ASAH2B	0.3783
ASAP1	0.187559
ASAP2	0.626636
ASAP3	0.992377
ASB1	0.24382
ASB10	0.163453
ASB11	0.922175
ASB12	0.384866
ASB13	0.14682
ASB14	0.602514
ASB15	0.492851
ASB16	0.285579
ASB17	0.431696
ASB2	0.393532
ASB4	0.993053
ASB5	0.595822
ASB6	0.636257
ASB7	0.210101
ASB8	0.0857152
ASB9	0.575259
ASCC2	0.883434
ASCC3	0.246822
ASCL1	0.863752
ASCL2	0.185843
ASCL3	0.638839
ASCL4	0.15632
ASF1A	0.572977
ASF1B	0.91493
ASGR1	0.131072
ASGR2	0.816952
ASH1L	0.456585
ASH2L	0.635984
ASIP	0.576849
ASL	0.302558
ASNA1	0.977935
ASNS	0.390723
ASNSD1	0.74186
ASPA	0.517836
ASPDH	0.99452
ASPH	0.442187
ASPHD1	0.882955
ASPHD2	0.0805205
ASPM	0.928342
ASPN	0.530738
ASPRV1	0.00435881
ASPSCR1	0.851314
ASRGL1	0.688768
ASS1	0.300916
ASTE1	0.192514
ASTL	0.773421
ASTN1	0.249417
ASTN2	0.227951
ASXL1	0.189217
ASXL2	0.0804927
ASXL3	0.62227
ASZ1	0.579867
ATAD1	0.911421
ATAD2	0.704306
ATAD3A	0.197231
ATAD3B	0.84809
ATAD3C	0.0274612
ATAD5	0.764164
ATAT1	0.758847
ATCAY	0.125774
ATE1	0.281991
ATF1	0.577972
ATF2	0.971975
ATF3	0.100754
ATF4	0.876045
ATF5	0.978887
ATF6	0.92682
ATF6B	0.505999
ATF7IP	0.770284
ATF7IP2	0.152972
ATG10	0.783918
ATG14	0.0214377
ATG16L1	0.282362
ATG16L2	0.517437
ATG2A	0.442087
ATG2B	0.037914
ATG3	0.399776
ATG4A	0.363245
ATG4B	0.0390241
ATG4C	0.838965
ATG4D	0.0305772
ATG5	0.0701117
ATG7	0.233161
ATG9A	0.222436
ATHL1	0.198474
ATIC	0.770763
ATL1	0.840131
ATL2	0.701458
ATL3	0.6416
ATM	0.121951
ATMIN	0.263698
ATN1	0.520476
ATOH1	0.593185
ATOH7	0.868726
ATOH8	0.146052
ATOX1	0.990678
ATP10A	0.979632
ATP10D	0.120796
ATP11A	0.357505
ATP11B	0.075842
ATP11C	0.699468
ATP12A	0.485047
ATP13A1	0.860927
ATP13A2	0.952232
ATP13A3	0.30352
ATP13A4	0.933514
ATP13A5	0.444485
ATP1A1	0.943533
ATP1A2	0.281314
ATP1A3	0.302635
ATP1A4	0.950817
ATP1B1	0.0457718
ATP1B2	0.330316
ATP1B3	0.127843
ATP1B4	0.516034
ATP2A1	0.230034
ATP2A2	0.263579
ATP2A3	0.499276
ATP2B1	0.126925
ATP2B2	0.374174
ATP2B3	0.43255
ATP2B4	0.101618
ATP2C1	0.185307
ATP2C2	0.242477
ATP4A	0.292083
ATP4B	0.848286
ATP5A1	0.124552
ATP5B	0.0140831
ATP5C1	0.0777413
ATP5D	0.690415
ATP5E	0.465937
ATP5EP2	0.869785
ATP5F1	0.542887
ATP5G1	0.815599
ATP5G2	0.366039
ATP5G3	0.052309
ATP5H	0.672908
ATP5I	0.704005
ATP5J	0.637251
ATP5J2	0.171278
ATP5L	0.70452
ATP5O	0.546448
ATP5S	0.309277
ATP6AP1	0.001643
ATP6AP1L	0.244384
ATP6AP2	0.81696
ATP6V0A1	0.466474
ATP6V0A2	0.140166
ATP6V0A4	0.549417
ATP6V0B	0.958807
ATP6V0C	0.28794
ATP6V0D1	0.44564
ATP6V0E1	0.351258
ATP6V0E2	0.748106
ATP6V1A	0.122782
ATP6V1B1	0.0707667
ATP6V1B2	0.226178
ATP6V1C1	0.592318
ATP6V1C2	0.0832577
ATP6V1D	0.231681
ATP6V1E1	0.595527
ATP6V1E2	0.638258
ATP6V1F	0.637279
ATP6V1G1	0.68554
ATP6V1G2	0.0495919
ATP6V1G3	0.0694446
ATP6V1H	0.595735
ATP7A	0.937062
ATP7B	0.694751
ATP8A1	0.389218
ATP8A2	0.497736
ATP8B1	0.136328
ATP8B2	0.675102
ATP8B3	0.159368
ATP9A	0.956183
ATP9B	0.0982693
ATPAF1	0.537694
ATPAF2	0.683982
ATPIF1	0.660723
ATR	0.0747096
ATRIP	0.290374
ATRN	0.269466
ATRX	0.158699
ATXN1	0.963906
ATXN10	0.449491
ATXN1L	0.545836
ATXN2	0.51403
ATXN2L	0.12173
ATXN3	0.414493
ATXN3L	0.073414
ATXN7	0.554938
ATXN7L2	0.0711143
ATXN7L3	0.219585
ATXN7L3B	0.590919
AUH	0.801974
AUP1	0.0337509
AURKA	0.731777
AURKAIP1	0.559524
AURKAPS1	0.409871
AURKB	0.223044
AURKC	0.906695
AUTS2	0.10655
AVEN	0.501705
AVIL	0.519337
AVL9	0.00263396
AVP	0.0727719
AVPI1	0.757856
AVPR1A	0.653457
AVPR1B	0.0577376
AWAT1	0.124609
AXDND1	0.51705
AXIN1	0.991502
AXIN2	0.331152
AXL	0.1304
AZGP1	0.868096
AZI2	0.747334
AZIN1	0.140006
AZU1	0.162089
B2M	0.0235425
B3GALNT1	0.239803
B3GALNT2	0.042556
B3GALT1	0.354725
B3GALT2	0.104211
B3GALT4	0.59208
B3GALT5	0.307163
B3GAT1	0.11989
B3GAT2	0.111012
B3GAT3	0.844151
B3GNT2	0.109395
B3GNT3	0.327647
B3GNT4	0.878553
B3GNT5	0.339482
B3GNT6	0.649808
B3GNT7	0.832581
B3GNT8	0.743023
B3GNT9	0.462915
B3GNTL1	0.674361
B4GALNT1	0.195582
B4GALNT2	0.40582
B4GALNT3	0.886577
B4GALNT4	0.95475
B4GALT1	0.122933
B4GALT2	0.709882
B4GALT3	0.238299
B4GALT4	0.56841
B4GALT5	0.699869
B4GALT6	0.00723267
B9D1	0.270067
BAALC	0.592014
BAAT	0.16881
BABAM1	0.566613
BACE1	0.111486
BACE2	0.463541
BACH1	0.672964
BACH2	0.51883
BAD	0.540527
BAG3	0.0107884
BAG4	0.26806
BAG5	0.465296
BAG6	0.634477
BAHD1	0.926339
BAIAP2	0.639266
BAIAP2L1	0.721183
BAIAP2L2	0.638467
BAIAP3	0.0446318
BAK1	0.211728
BAMBI	0.361747
BANF1	0.633558
BANF2	0.241267
BANK1	0.7322
BANP	0.875269
BAP1	0.709421
BARD1	0.534883
BARHL1	0.148027
BARHL2	0.592051
BARX1	0.0582417
BARX2	0.254313
BASP1	0.700013
BATF	0.574467
BATF2	0.883646
BATF3	0.344476
BAX	0.024853
BAZ1A	0.61413
BAZ1B	0.614422
BAZ2A	0.784617
BAZ2B	0.29798
BBC3	0.957378
BBOX1	0.478487
BBS1	0.645929
BBS10	0.478546
BBS2	0.79436
BBS4	0.747974
BBS5	0.552819
BBS7	0.246075
BBS9	0.818794
BBX	0.385302
BCAM	0.472896
BCAN	0.573087
BCAP29	0.0823792
BCAP31	0.340255
BCAR1	0.631621
BCAR3	0.700491
BCAS1	0.108763
BCAS2	0.0537845
BCAS3	0.263448
BCAS4	0.324273
BCAT1	0.494916
BCAT2	0.660972
BCCIP	0.238421
BCDIN3D	0.868685
BCHE	0.239958
BCKDHA	0.599449
BCKDHB	0.385661
BCKDK	0.101281
BCL10	0.654062
BCL11A	0.934958
BCL11B	0.126845
BCL2	0.454781
BCL2A1	0.40824
BCL2L1	0.855627
BCL2L10	0.78222
BCL2L11	0.082979
BCL2L12	0.110879
BCL2L13	0.886268
BCL2L14	0.146431
BCL2L15	0.650644
BCL2L2	0.300376
BCL3	0.809657
BCL6	0.168955
BCL6B	0.663562
BCL7A	0.677954
BCL7B	0.72106
BCL7C	0.597611
BCL9	0.66752
BCL9L	0.828559
BCLAF1	0.432868
BCO2	0.54634
BCOR	0.520834
BCORL1	0.818795
BCR	0.825132
BCRP2	0.799203
BCS1L	0.70475
BDH1	0.0401287
BDKRB1	0.243277
BDKRB2	0.744143
BDNF	0.758544
BDP1	0.874794
BEAN1	0.516604
BECN1	0.185765
BEGAIN	0.709099
BEND3	0.378648
BEND4	0.40248
BEND5	0.380526
BEND6	0.253381
BEND7	0.531741
BEST1	0.505968
BEST2	0.370123
BEST3	0.649645
BET1	0.069604
BET1L	0.306797
BEX1	0.535519
BEX2	0.0383906
BEX4	0.585424
BEX5	0.00384827
BFAR	0.956775
BFSP1	0.413787
BFSP2	0.223522
BGN	0.501879
BHLHA15	0.920717
BHLHB9	0.368204
BHLHE22	0.834148
BHLHE23	0.269069
BHLHE40	0.645225
BHLHE41	0.734485
BHMT	0.870487
BICC1	0.347625
BICD1	0.601202
BICD2	0.0461541
BID	0.891104
BIK	0.279685
BIN1	0.177107
BIN2	0.487955
BIN3	0.278528
BIRC2	0.247826
BIRC3	0.425152
BIRC5	0.359355
BIRC6	0.0342454
BIRC7	0.177875
BIRC8	0.546428
BIVM	0.0961261
BLCAP	0.926806
BLID	0.660595
BLK	0.454474
BLM	0.243155
BLMH	0.698792
BLNK	0.419977
BLOC1S2	0.299827
BLOC1S3	0.60161
BLVRA	0.310587
BLVRB	0.5516
BMF	0.218893
BMI1	0.529784
BMP1	0.318508
BMP10	0.137579
BMP15	0.981876
BMP2	0.0998248
BMP2K	0.333554
BMP3	0.552998
BMP4	0.465348
BMP5	0.462092
BMP6	0.393773
BMP7	0.327146
BMP8A	0.230466
BMPER	0.204346
BMPR1A	0.0125068
BMPR1B	0.863923
BMPR2	0.951939
BMS1	0.513339
BMS1P4	0.0840699
BMS1P5	0.665147
BMX	0.289031
BNC1	0.851656
BNC2	0.34365
BNIP1	0.101609
BNIP2	0.423608
BNIP3	0.152918
BNIP3L	0.813515
BNIPL	0.777035
BOC	0.277288
BOD1	0.0360769
BOK	0.354938
BOLA1	0.965356
BOLA2	0.239254
BOLA2B	0.208379
BOLA3	0.168788
BOLL	0.297123
BOP1	0.978544
BPGM	0.613728
BPHL	0.711288
BPI	0.674598
BPIFA1	0.151474
BPNT1	0.261931
BPTF	0.801346
BRAF	0.73296
BRAT1	0.384079
BRCA1	0.0631985
BRCA2	0.466914
BRD1	0.771496
BRD2	0.687646
BRD3	0.360566
BRD4	0.0461382
BRD7	0.213526
BRD8	0.608183
BRD9	0.41711
BRDT	0.632657
BRE	0.725255
BRF1	0.892998
BRF2	0.73137
BRI3	0.107232
BRI3BP	0.881464
BRIX1	0.489821
BRMS1	0.948369
BRMS1L	0.951257
BROX	0.926369
BRPF1	0.95069
BRPF3	0.0318898
BRS3	0.688963
BRSK1	0.613773
BRSK2	0.0897829
BRWD1	0.943388
BRWD1-IT2	0.828937
BRWD3	0.851435
BSCL2	0.563715
BSDC1	0.298563
BSG	0.410538
BSN	0.27559
BSND	0.826657
BST1	0.398311
BST2	0.539251
BSX	0.93293
BTAF1	0.982897
BTBD1	0.548936
BTBD10	0.178035
BTBD11	0.331461
BTBD16	0.273004
BTBD17	0.725964
BTBD18	0.0205979
BTBD3	0.624188
BTBD6	0.572549
BTBD7	0.862242
BTBD8	0.909211
BTBD9	0.0306072
BTC	0.153897
BTD	0.258152
BTF3	0.429025
BTF3L4	0.720444
BTG1	0.201329
BTG2	0.849148
BTG3	0.0206997
BTG4	0.848777
BTK	0.145606
BTLA	0.327255
BTN1A1	0.232967
BTN2A1	0.0174542
BTN2A2	0.606461
BTN3A1	0.719304
BTN3A2	0.386768
BTN3A3	0.996848
BTNL2	0.482555
BTNL3	0.483676
BTNL8	0.707865
BTRC	0.554628
BUB1	0.946329
BUB3	0.949785
BUD13	0.782186
BUD31	0.432544
BVES	0.641062
BYSL	0.435535
BZRAP1	0.999431
BZW1	0.680335
BZW2	0.598669
C10orf10	0.447901
C10orf11	0.574324
C10orf111	0.589958
C10orf113	0.546471
C10orf12	0.426665
C10orf120	0.657971
C10orf128	0.635928
C10orf2	0.210093
C10orf53	0.916699
C10orf62	0.825641
C10orf71	0.981218
C10orf76	0.367695
C10orf82	0.0892944
C10orf88	0.901207
C10orf90	0.280834
C10orf91	0.043317
C10orf95	0.185761
C10orf99	0.91589
C11orf1	0.405406
C11orf16	0.084332
C11orf24	0.875322
C11orf31	0.38124
C11orf40	0.551617
C11orf42	0.631048
C11orf44	0.677993
C11orf45	0.0319536
C11orf49	0.571371
C11orf53	0.745102
C11orf54	0.151538
C11orf57	0.601212
C11orf58	0.774856
C11orf63	0.177635
C11orf65	0.387081
C11orf68	0.455016
C11orf70	0.299627
C11orf71	0.223016
C11orf73	0.526594
C11orf74	0.483881
C11orf80	0.556199
C11orf84	0.911953
C11orf85	0.482265
C11orf87	0.226127
C11orf88	0.286115
C11orf94	0.0851402
C11orf95	0.77864
C11orf96	0.465466
C12orf10	0.475859
C12orf29	0.99677
C12orf4	0.467085
C12orf40	0.171455
C12orf42	0.653218
C12orf43	0.923086
C12orf45	0.957519
C12orf49	0.544035
C12orf50	0.181766
C12orf54	0.172829
C12orf56	0.769751
C12orf57	0.539877
C12orf60	0.514595
C12orf71	0.797742
C12orf75	0.150887
C12orf76	0.431379
C14orf105	0.457283
C14orf142	0.175904
C14orf166	0.533753
C14orf169	0.796487
C14orf177	0.217805
C14orf178	0.61073
C14orf180	0.881971
C14orf2	0.270086
C14orf28	0.117881
C14orf37	0.884526
C14orf39	0.131668
C14orf79	0.785687
C14orf80	0.397616
C14orf93	0.609318
C15orf32	0.851925
C15orf41	0.915668
C15orf43	0.363376
C15orf48	0.461173
C15orf53	0.975314
C15orf56	0.402925
C15orf57	0.46948
C15orf59	0.762636
C15orf61	0.18207
C15orf62	0.750558
C16orf13	0.357677
C16orf45	0.128232
C16orf46	0.290106
C16orf47	0.437293
C16orf52	0.499405
C16orf54	0.0286866
C16orf59	0.417795
C16orf62	0.620139
C16orf70	0.880828
C16orf71	0.909191
C16orf72	0.981447
C16orf74	0.21993
C16orf78	0.360698
C16orf82	0.285901
C16orf86	0.829528
C16orf87	0.182529
C16orf89	0.298052
C16orf90	0.799724
C16orf91	0.992413
C17orf100	0.554779
C17orf107	0.505062
C17orf47	0.879376
C17orf50	0.571016
C17orf51	0.275885
C17orf53	0.4928
C17orf58	0.178001
C17orf62	0.0368925
C17orf64	0.866384
C17orf67	0.107083
C17orf74	0.574271
C17orf75	0.187309
C17orf78	0.0261318
C17orf80	0.0270997
C17orf82	0.695254
C17orf97	0.0279311
C17orf98	0.397789
C18orf21	0.0721319
C18orf25	0.189191
C18orf32	0.374134
C18orf54	0.219474
C18orf8	0.392021
C19orf12	0.764045
C19orf18	0.588452
C19orf24	0.352417
C19orf25	0.530546
C19orf33	0.146682
C19orf38	0.658773
C19orf43	0.412003
C19orf44	0.422361
C19orf45	0.194432
C19orf47	0.297376
C19orf48	0.691263
C19orf52	0.855804
C19orf53	0.969662
C19orf54	0.657123
C19orf57	0.242469
C19orf60	0.676554
C19orf66	0.394013
C19orf67	0.537736
C19orf70	0.942882
C19orf73	0.0801546
C1D	0.909351
C1GALT1	0.702376
C1GALT1C1	0.27532
C1orf100	0.929155
C1orf101	0.853629
C1orf105	0.147631
C1orf106	0.219257
C1orf109	0.461509
C1orf111	0.970897
C1orf112	0.731969
C1orf115	0.521206
C1orf116	0.17017
C1orf122	0.112035
C1orf123	0.029082
C1orf127	0.0832481
C1orf131	0.0761902
C1orf141	0.978147
C1orf146	0.58961
C1orf158	0.0460666
C1orf159	0.308308
C1orf162	0.54232
C1orf167	0.285647
C1orf168	0.512651
C1orf185	0.369588
C1orf189	0.848852
C1orf194	0.766501
C1orf198	0.6105
C1orf204	0.709084
C1orf21	0.426715
C1orf226	0.099869
C1orf228	0.255797
C1orf35	0.233737
C1orf43	0.718403
C1orf50	0.47683
C1orf53	0.114494
C1orf54	0.942378
C1orf56	0.701298
C1orf61	0.336793
C1orf64	0.774588
C1orf74	0.471529
C1orf87	0.182948
C1orf94	0.192502
C1orf95	0.0902353
C1QA	0.641944
C1QB	0.705441
C1QBP	0.93418
C1QC	0.897106
C1QL1	0.96538
C1QL2	0.945363
C1QL3	0.395041
C1QL4	0.511225
C1QTNF1	0.2667
C1QTNF2	0.638177
C1QTNF3	0.375812
C1QTNF4	0.663753
C1QTNF5	0.801596
C1QTNF6	0.398479
C1QTNF7	0.685097
C1QTNF8	0.809078
C1QTNF9	0.713857
C1R	0.661829
C1S	0.390981
C2	0.722273
C20orf141	0.022615
C20orf144	0.850243
C20orf173	0.615673
C20orf194	0.576263
C20orf195	0.0819595
C20orf202	0.828037
C20orf24	0.606909
C20orf27	0.23562
C20orf85	0.440898
C20orf96	0.0520356
C21orf2	0.389758
C21orf33	0.809325
C21orf58	0.183532
C21orf59	0.489156
C21orf62	0.665624
C21orf91	0.392769
C21orf91-OT1	0.011001
C22orf15	0.790093
C22orf23	0.796665
C22orf31	0.520119
C22orf39	0.667639
C22orf42	0.868875
C22orf46	0.188266
C2CD2	0.321612
C2CD2L	0.511188
C2CD3	0.46888
C2CD4A	0.0589638
C2CD4B	0.303136
C2orf15	0.229706
C2orf16	0.263513
C2orf27A	0.0123852
C2orf27B	0.727101
C2orf40	0.60519
C2orf42	0.0907554
C2orf44	0.171854
C2orf47	0.602168
C2orf49	0.342389
C2orf57	0.77782
C2orf66	0.252605
C2orf69	0.921533
C2orf71	0.438584
C2orf74	0.626574
C2orf76	0.316997
C2orf78	0.374756
C2orf81	0.908927
C2orf82	0.749833
C2orf83	0.339631
C2orf88	0.813419
C3	0.652245
C3orf14	0.64985
C3orf17	0.932522
C3orf18	0.707182
C3orf20	0.992057
C3orf22	0.124131
C3orf30	0.934636
C3orf36	0.0587092
C3orf52	0.80119
C3orf56	0.633264
C3orf58	0.483108
C3orf67	0.109808
C3orf70	0.9295
C3orf79	0.888815
C4A	0.957591
C4B	0.694973
C4BPA	0.248513
C4BPB	0.933362
C4orf17	0.545664
C4orf19	0.978228
C4orf22	0.837396
C4orf26	0.212041
C4orf27	0.694501
C4orf32	0.211147
C4orf36	0.398283
C4orf45	0.519525
C4orf47	0.802646
C4orf48	0.589601
C4orf51	0.862473
C5	0.85719
C5orf15	0.543333
C5orf22	0.707408
C5orf24	0.867412
C5orf28	0.874928
C5orf30	0.0186077
C5orf34	0.952684
C5orf38	0.0472829
C5orf42	0.945115
C5orf45	0.877867
C5orf46	0.762289
C5orf51	0.518112
C5orf58	0.252155
C6	0.608693
C6orf1	0.694475
C6orf10	0.260425
C6orf106	0.17819
C6orf118	0.49738
C6orf120	0.395161
C6orf132	0.879532
C6orf141	0.837702
C6orf15	0.797069
C6orf163	0.186539
C6orf201	0.152282
C6orf203	0.663408
C6orf222	0.559643
C6orf223	0.675366
C6orf226	0.845978
C6orf25	0.413286
C6orf47	0.755983
C6orf48	0.174477
C6orf52	0.84077
C6orf58	0.441904
C6orf62	0.0997467
C6orf89	0.00233308
C7	0.28619
C7orf13	0.978624
C7orf25	0.137067
C7orf26	0.921947
C7orf33	0.632417
C7orf34	0.751517
C7orf43	0.473296
C7orf49	0.716435
C7orf50	0.930983
C7orf55	0.974841
C7orf57	0.148084
C7orf61	0.833503
C7orf62	0.128991
C7orf66	0.431517
C7orf69	0.557714
C7orf72	0.197405
C8A	0.290846
C8B	0.908994
C8G	0.974144
C8orf31	0.158186
C8orf34	0.93051
C8orf37	0.541027
C8orf4	0.543097
C8orf44	0.877628
C8orf46	0.278188
C8orf49	0.0894959
C8orf58	0.947131
C8orf59	0.169334
C8orf74	0.644639
C8orf82	0.0337659
C8orf86	0.466125
C9	0.593826
C9orf116	0.293685
C9orf131	0.886418
C9orf135	0.320921
C9orf139	0.862787
C9orf142	0.726107
C9orf152	0.318612
C9orf153	0.807586
C9orf16	0.811281
C9orf163	0.876408
C9orf172	0.256641
C9orf173	0.458012
C9orf24	0.958346
C9orf3	0.100215
C9orf43	0.269275
C9orf47	0.200261
C9orf50	0.313579
C9orf57	0.584729
C9orf62	0.0880027
C9orf72	0.284472
C9orf78	0.757258
C9orf84	0.652223
C9orf85	0.755506
C9orf9	0.597253
CA1	0.126537
CA10	0.542717
CA11	0.954441
CA12	0.475309
CA13	0.471097
CA14	0.0795057
CA2	0.301582
CA3	0.573382
CA4	0.943833
CA5A	0.622253
CA5B	0.545106
CA6	0.161362
CA7	0.505007
CA8	0.665663
CA9	0.844775
CAB39	0.378764
CAB39L	0.475751
CABIN1	0.512841
CABLES1	0.246642
CABLES2	0.0142758
CABP1	0.0153427
CABP2	0.199143
CABP4	0.468555
CABP5	0.15084
CABS1	0.43993
CABYR	0.981308
CACHD1	0.387732
CACNA1A	0.646977
CACNA1B	0.118652
CACNA1C	0.38808
CACNA1D	0.388907
CACNA1E	0.149677
CACNA1F	0.475266
CACNA1G	0.868551
CACNA1H	0.118576
CACNA1I	0.0941496
CACNA1S	0.894519
CACNA2D1	0.836211
CACNA2D2	0.599503
CACNA2D3	0.227337
CACNA2D4	0.216206
CACNB1	0.211924
CACNB2	0.449404
CACNB3	0.0928603
CACNB4	0.556137
CACNG1	0.141972
CACNG2	0.574308
CACNG3	0.443273
CACNG4	0.661742
CACNG5	0.455865
CACNG6	0.0674573
CACNG7	0.544943
CACNG8	0.419014
CACYBP	0.338932
CAD	0.0152591
CADM1	0.644945
CADM2	0.995337
CADM3	0.73426
CADM4	0.339293
CADPS	0.21525
CADPS2	0.903129
CAGE1	0.0340924
CALB1	0.606626
CALB2	0.272421
CALCA	0.448633
CALCB	0.638976
CALCOCO1	0.79099
CALCOCO2	0.781333
CALCR	0.536325
CALCRL	0.515525
CALD1	0.0345831
CALHM2	0.187218
CALM1	0.919731
CALM2	0.426407
CALM3	0.600187
CALML3	0.111588
CALML4	0.74538
CALML5	0.0459252
CALML6	0.248316
CALN1	0.0854817
CALR	0.0972455
CALR3	0.584619
CALU	0.610228
CALY	0.863954
CAMK1	0.552548
CAMK1D	0.165616
CAMK1G	0.24368
CAMK2A	0.768345
CAMK2B	0.591527
CAMK2D	0.218349
CAMK2G	0.718136
CAMK2N1	0.801488
CAMK2N2	0.34288
CAMK4	0.257107
CAMKK1	0.217263
CAMKK2	0.837989
CAMKMT	0.525748
CAMKV	0.334168
CAMLG	0.684786
CAMP	0.250493
CAMSAP1	0.0197836
CAMTA1	0.920856
CAMTA2	0.24813
CAND1	0.968976
CAND2	0.601808
CANT1	0.515259
CANX	0.253097
CAP1	0.739494
CAP2	0.565315
CAPG	0.224105
CAPN1	0.542039
CAPN10	0.640767
CAPN11	0.0290144
CAPN12	0.730809
CAPN13	0.91152
CAPN14	0.317526
CAPN2	0.290216
CAPN3	0.760914
CAPN5	0.456601
CAPN7	0.866857
CAPN8	0.0857819
CAPN9	0.85136
CAPNS1	0.268868
CAPNS2	0.428707
CAPRIN1	0.108081
CAPRIN2	0.745028
CAPS	0.305859
CAPS2	0.307489
CAPSL	0.305616
CAPZA1	0.512904
CAPZA2	0.488738
CAPZA3	0.673672
CAPZB	0.229647
CARD10	0.835598
CARD11	0.762388
CARD14	0.0295542
CARD16	0.509026
CARD17	0.448491
CARD18	0.767906
CARD9	0.544878
CARHSP1	0.634879
CARKD	0.039934
CARM1	0.502878
CARS	0.304535
CARS2	0.419523
CARTPT	0.474501
CASC1	0.65012
CASC3	0.41639
CASC4	0.666847
CASC5	0.110469
CASD1	0.794827
CASK	0.295722
CASKIN1	0.145226
CASKIN2	0.482769
CASP1	0.408007
CASP10	0.589875
CASP12	0.549135
CASP14	0.04503
CASP2	0.100066
CASP3	0.528254
CASP4	0.717279
CASP5	0.480446
[truncated: 14,197 more rows]

## Sheet: Supplementary Table S10
Supplementary Table S10 DEGs between CNAB11 high group and CNAB11 low group
	logFC	t	P.Value	adj.P.Val	B
AURKA	1.27627	10.3378	1.18279e-23	5.43816e-20	42.8294
FAM83D	1.01125	10.1831	4.90605e-23	1.80454e-19	41.4432
DSN1	1.05859	9.52689	1.70499e-20	2.55725e-17	35.7453
KPNA2	1.17706	9.44278	3.53069e-20	4.32886e-17	35.0369
PSMD12	1.43263	8.85948	4.77597e-18	2.73678e-15	30.2642
SPAG5	1.03601	8.68425	1.98599e-17	8.9084e-15	28.8793
NOL11	1.62009	8.31112	3.82289e-16	9.63106e-14	26.0075
ACTL6A	1.25926	7.95419	5.85581e-15	1.02566e-12	23.3603
DSCC1	1.6663	7.94557	6.24708e-15	1.08387e-12	23.2976
AMZ2	1.45006	7.76038	2.47187e-14	3.52405e-12	21.9646
FOXM1	1.16638	7.72481	3.20932e-14	4.43779e-12	21.7117
TBC1D31	1.29151	7.45246	2.29164e-13	2.4374e-11	19.8085
EME1	1.27222	7.22287	1.14748e-12	9.95441e-11	18.2506
UBE2O	1.14513	7.18368	1.50425e-12	1.26322e-10	17.9889
TOP2A	1.18039	7.05224	3.69511e-12	2.60371e-10	17.1206
MCM4	1.09329	7.00765	4.99655e-12	3.37837e-10	16.8292
C8orf76	1.84097	6.99045	5.61076e-12	3.67215e-10	16.7172
RAD51AP1	1.10696	6.92492	8.70762e-12	5.56048e-10	16.2929
RAD54B	1.10602	6.82213	1.7226e-11	1.00572e-09	15.6346
NPLOC4	1.0748	6.81437	1.81303e-11	1.05146e-09	15.5852
SKA2	1.17065	6.7441	2.87468e-11	1.53241e-09	15.1406
TACO1	1.25064	6.69358	3.99392e-11	2.02348e-09	14.8236
CYB561	1.08841	6.63508	5.82926e-11	2.82121e-09	14.4591
YWHAB	1.00451	6.57614	8.50836e-11	3.94149e-09	14.0948
LRRC59	1.65327	6.4586	1.79281e-10	7.70363e-09	13.377
MCM10	1.08267	6.38891	2.77383e-10	1.13363e-08	12.957
SRP68	1.23231	6.33839	3.79638e-10	1.4988e-08	12.655
SUV39H2	1.00805	6.33799	3.80587e-10	1.4988e-08	12.6526
ATAD2	1.14732	6.30118	4.77724e-10	1.8342e-08	12.434
POLR2K	1.46813	6.29074	5.09421e-10	1.9357e-08	12.3722
NCAPD2	1.16227	6.24313	6.82095e-10	2.47913e-08	12.0916
YTHDF1	1.40858	6.24273	6.83731e-10	2.48018e-08	12.0893
GID8	1.26144	6.21736	7.98193e-10	2.83937e-08	11.9405
INTS2	1.11717	6.19458	9.16712e-10	3.22974e-08	11.8075
NELFCD	1.23001	6.18535	9.69477e-10	3.38324e-08	11.7537
PTDSS1	1.26812	6.15622	1.15628e-09	3.94031e-08	11.5844
YWHAZ	1.33195	6.15227	1.18423e-09	4.01091e-08	11.5615
GTPBP4	1.04261	6.14934	1.20534e-09	4.06741e-08	11.5445
METTL2A	1.26807	6.14149	1.26369e-09	4.24873e-08	11.4991
TLK2	1.46404	6.10092	1.61244e-09	5.2672e-08	11.265
NUDCD1	1.3866	6.09402	1.68046e-09	5.44109e-08	11.2254
RAE1	1.58525	6.08096	1.81694e-09	5.81813e-08	11.1504
FAM91A1	1.09703	6.08047	1.82222e-09	5.81813e-08	11.1476
CSTF1	1.46181	6.03279	2.42019e-09	7.30866e-08	10.8752
MTDH	1.30631	5.98777	3.15833e-09	9.19065e-08	10.6197
MTBP	1.35385	5.9727	3.45124e-09	9.93298e-08	10.5347
DERL1	1.53974	5.92791	4.48742e-09	1.24289e-07	10.2828
CCDC47	1.06875	5.92085	4.67623e-09	1.28551e-07	10.2433
DPM1	1.12201	5.91051	4.96664e-09	1.35723e-07	10.1856
SMARCD2	1.36123	5.79533	9.66215e-09	2.42755e-07	9.5478
INTS8	1.04493	5.71058	1.56519e-08	3.70468e-07	9.08593
RTFDC1	1.33115	5.70887	1.58042e-08	3.73112e-07	9.07666
TMEM65	1.17006	5.67625	1.8996e-08	4.35767e-07	8.90062
OSBPL2	1.08373	5.62857	2.48153e-08	5.53186e-07	8.64498
FTSJ3	1.23428	5.60114	2.8913e-08	6.30769e-07	8.49883
UBE2V2	1.13184	5.59331	3.01997e-08	6.53414e-07	8.4572
DCAF13	1.44765	5.58156	3.22337e-08	6.90117e-07	8.39488
TAF4	1.21209	5.50579	4.89379e-08	9.79343e-07	7.99588
MTERF3	1.22164	5.46677	6.05597e-08	1.17114e-06	7.79238
SLC35B1	1.47602	5.31646	1.35915e-07	2.35228e-06	7.02108
CDC6	1.62722	5.15264	3.20744e-07	5.00394e-06	6.20331
CLTC	1.56734	5.10643	4.06913e-07	6.18474e-06	5.97696
NME1	1.10044	5.07714	4.727e-07	7.07358e-06	5.83447
MTFR1	1.0388	5.06588	5.00617e-07	7.42487e-06	5.77993
RAB22A	1.39883	5.05311	5.34227e-07	7.8537e-06	5.71817
ENY2	1.00697	5.00986	6.65005e-07	9.48806e-06	5.51014
UTP18	1.6402	4.96	8.54238e-07	1.17504e-05	5.27238
CDC123	1.10637	4.93716	9.57373e-07	1.29368e-05	5.16421
AGO2	1.20094	4.93561	9.64792e-07	1.30275e-05	5.15689
CDK12	2.16739	4.84946	1.47662e-06	1.86771e-05	4.75331
STARD3	3.14186	4.8241	1.67165e-06	2.0633e-05	4.63578
EMC2	1.21788	4.80171	1.86423e-06	2.25264e-05	4.5325
TUBD1	1.37777	4.76523	2.22457e-06	2.62425e-05	4.36519
VMP1	1.20122	4.75456	2.3421e-06	2.74879e-05	4.31647
CPNE1	1.04542	4.72716	2.67171e-06	3.08833e-05	4.19189
SMG8	1.41318	4.70708	2.9412e-06	3.34518e-05	4.101
ERBB2	3.861	4.66239	3.63778e-06	4.01094e-05	3.90007
HCCS	1.10177	4.57886	5.38673e-06	5.62883e-05	3.52936
TRIM37	1.13835	4.5777	5.41605e-06	5.64983e-05	3.52424
PTRH2	1.25652	4.51664	7.18735e-06	7.1566e-05	3.25737
PGAP3	2.59152	4.45452	9.55264e-06	9.15013e-05	2.98933
PSMD3	3.49681	4.3535	1.5061e-05	0.000134264	2.56102
UBE2Z	1.37775	4.3509	1.52371e-05	0.000135637	2.5501
FBXL20	2.25291	4.31274	1.80522e-05	0.000156825	2.39083
MIEN1	2.666	4.28705	2.022e-05	0.000173364	2.28436
MED1	2.65264	4.0893	4.74555e-05	0.000359306	1.48528
CCNE1	1.01932	4.05163	5.56078e-05	0.000411854	1.33717
POP4	1.62818	4.01951	6.35948e-05	0.000461006	1.2119
MSL1	1.80747	3.9765	7.59997e-05	0.000536549	1.04571
TTI1	1.02354	3.96847	7.85574e-05	0.000553332	1.01486
PPM1D	1.20532	3.91006	9.97655e-05	0.00067307	0.79229
ORMDL3	2.12366	3.68249	0.000245833	0.00144122	-0.0443702
GRB7	2.28201	3.66535	0.000262611	0.00152549	-0.105408
GSDMB	1.39173	3.57024	0.000377039	0.0020668	-0.439186
CCT6A	1.33255	3.47367	0.000539822	0.00279186	-0.769367
FBXO47	2.10441	3.42613	0.000642165	0.00323652	-0.928691
PRR11	2.24855	3.13291	0.00179122	0.00763971	-1.86404
MED24	1.26942	3.09711	0.00201955	0.00843159	-1.97266
USP32	1.02908	3.06105	0.0022763	0.00933457	-2.08084
CASC3	1.50221	3.04449	0.00240392	0.00976378	-2.13009
LAPTM4B	1.17396	3.00286	0.00275431	0.0108864	-2.25276
HRH3	1.07212	2.92422	0.00354671	0.0133335	-2.48002
HEATR6	1.41679	2.77772	0.00559694	0.0194486	-2.88756
RPS6KB1	1.5428	2.75594	0.00597995	0.0205411	-2.9464
ATG5	1.01798	2.71435	0.00677761	0.0227707	-3.0575
USP26	1.23224	2.62965	0.00870455	0.0278894	-3.2786
BYSL	1.09661	2.58525	0.00989933	0.0309308	-3.39175
CWC25	1.10104	2.52475	0.0117622	0.0354529	-3.54288
KCNK9	1.16009	2.47581	0.013491	0.0395776	-3.66257
ATCAY	1.87936	2.47293	0.0135991	0.0398058	-3.66952
C17orf64	3.87705	2.46586	0.0138686	0.0404661	-3.68661
